# Supplementary material for: Antibiotic prescription among outpatients in a prefecture of Japan, 2012–2013: a retrospective claims database study
Source: PubMed Central journal article supplement — BMJ Open. 2019 Apr 3;9(4):e026251. doi: 10.1136/bmjopen-2018-026251 (PMC6500307; doi:10.1136/bmjopen-2018-026251), 2019-04-03
Supplement: bmjopen-2018-026251.draft_revisions.pdf [file bmjopen-2018-026251.draft_revisions.pdf]

# BMJ Open

BMJ Open is committed to open peer review. As part of this commitment we make the peer review history of every article we publish publicly available.

When an article is published we post the peer reviewers' comments and the authors' responses online. We also post the versions of the paper that were used during peer review. These are the versions that the peer review comments apply to.

The versions of the paper that follow are the versions that were submitted during the peer review process. They are not the versions of record or the final published versions. They should not be cited or distributed as the published version of this manuscript.

BMJ Open is an open access journal and the full, final, typeset and author-corrected version of record of the manuscript is available on our site with no access controls, subscription charges or pay-per-view fees (<http://bmjopen.bmj.com>).

If you have any questions on BMJ Open's open peer review process please email [editorial.bmjopen@bmj.com](mailto:editorial.bmjopen@bmj.com)

# BMJ Open

## Antibiotic prescription among outpatients in a prefecture of Japan, 2012–2013: A retrospective claims database study

|                               |                                                                                                                                                                                                                                                                                                                                                                                                                                                                                                                                                                                                                                                                                                                                                                                                                                    |
|-------------------------------|------------------------------------------------------------------------------------------------------------------------------------------------------------------------------------------------------------------------------------------------------------------------------------------------------------------------------------------------------------------------------------------------------------------------------------------------------------------------------------------------------------------------------------------------------------------------------------------------------------------------------------------------------------------------------------------------------------------------------------------------------------------------------------------------------------------------------------|
| Journal:                      | <i>BMJ Open</i>                                                                                                                                                                                                                                                                                                                                                                                                                                                                                                                                                                                                                                                                                                                                                                                                                    |
| Manuscript ID                 | bmjopen-2018-026251                                                                                                                                                                                                                                                                                                                                                                                                                                                                                                                                                                                                                                                                                                                                                                                                                |
| Article Type:                 | Research                                                                                                                                                                                                                                                                                                                                                                                                                                                                                                                                                                                                                                                                                                                                                                                                                           |
| Date Submitted by the Author: | 23-Aug-2018                                                                                                                                                                                                                                                                                                                                                                                                                                                                                                                                                                                                                                                                                                                                                                                                                        |
| Complete List of Authors:     | <p>Hashimoto, Hideki; Jichi Medical University Hospital, Division of General Internal Medicine</p> <p>Matsui, Hiroki; Jichi Medical University, Data Science Center; School of Public Health, University of Tokyo, Department of Clinical Epidemiology and Health Economics</p> <p>Sasabuchi, Yusuke; Jichi Medical University, Data Science Center</p> <p>Yasunaga, Hideo; Jichi Medical University, Data Science Center; School of Public Health, The University of Tokyo, Department of Clinical Epidemiology and Health Economics</p> <p>Kotani, Kazuhiko; Jichi Medical University, Division of Community and Family Medicine</p> <p>Nagai, Ryoza; Jichi Medical University, President</p> <p>Hatakeyama, Shuji; Jichi Medical University Hospital, Division of General Internal Medicine/Division of Infectious Diseases</p> |
| Keywords:                     | Epidemiology < INFECTIOUS DISEASES, Public health < INFECTIOUS DISEASES, INFECTIOUS DISEASES                                                                                                                                                                                                                                                                                                                                                                                                                                                                                                                                                                                                                                                                                                                                       |
|                               |                                                                                                                                                                                                                                                                                                                                                                                                                                                                                                                                                                                                                                                                                                                                                                                                                                    |

SCHOLARONE™  
Manuscripts

only

1  
2  
3  
4  
5  
6 1 **Antibiotic prescription among outpatients in a prefecture of Japan, 2012–2013: A**  
7  
8  
9 2 **retrospective claims database study**  
10  
11  
12  
13 3

14  
15 4 Hideki Hashimoto<sup>1</sup>, Hiroki Matsui<sup>2,3</sup>, Yusuke Sasabuchi<sup>2</sup>, Hideo Yasunaga<sup>2,3</sup>, Kazuhiko  
16  
17  
18 5 Kotani<sup>4</sup>, Ryozo Nagai<sup>5</sup>, Shuji Hatakeyama<sup>1,6\*</sup>  
19  
20  
21  
22 6

23  
24  
25 7 <sup>1</sup>Division of General Internal Medicine, Jichi Medical University Hospital, 3311-1  
26  
27  
28 8 Yakushiji, Shimotsuke-shi, Tochigi 329-0498, Japan.

29  
30  
31 9 <sup>2</sup>Data Science Center, Jichi Medical University, 3311-1 Yakushiji, Shimotsuke-shi,  
32  
33  
34 10 Tochigi 329-0498, Japan.

35  
36  
37 11 <sup>3</sup>Department of Clinical Epidemiology and Health Economics, School of Public Health,  
38  
39  
40 12 University of Tokyo, 7-3-1 Hongo, Bunkyo-ku, Tokyo 113-0033, Japan.

41  
42  
43 13 <sup>4</sup>Division of Community and Family Medicine, Jichi Medical University, 3311-1  
44  
45  
46 14 Yakushiji, Shimotsuke-shi, Tochigi 329-0498, Japan.

47  
48  
49 15 <sup>5</sup>President, Jichi Medical University, 3311-1 Yakushiji, Shimotsuke-shi, Tochigi  
50  
51  
52 16 329-0498, Japan.

1  
2  
3  
4  
5  
6 17 <sup>6</sup>Division of Infectious Diseases, Jichi Medical University Hospital, 3311-1 Yakushiji,  
7

8  
9 18 Shimotsuke-shi, Tochigi 329-0498, Japan.  
10

11  
12 19  
13

14  
15 20 **\*Corresponding author:**  
16

17  
18 21 Shuji Hatakeyama, M.D., Ph.D.  
19

20  
21 22 Division of General Internal Medicine/Division of Infectious Diseases, Jichi Medical  
22

23 23 University Hospital, 3311-1 Yakushiji, Shimotsuke-shi, Tochigi 329-0498, Japan.  
24

25  
26 24 Phone: +81-285-58-7498  
27

28  
29 25 Fax: +81-285-40-5160  
30

31 26 E-mail: shatake-tky@umin.ac.jp  
32

33  
34 27  
35

36  
37 28 **Key words:** antibiotic, antimicrobial stewardship, antimicrobial-resistance, big data,  
38

39 29 inappropriate prescribing  
40

41  
42 30 **Running title:** Antibiotic prescriptions in Japan  
43

44  
45 31 **Word count for the main text:** 2,511 words  
46

47  
48 32  
49  
50  
51  
52  
53  
54  
55  
56  
57  
58  
59  
60

1  
2  
3  
4  
5  
6 33 **Abstract**

7  
8  
9 34 **Objectives:** To investigate antibiotic prescribing patterns and identify factors associated  
10  
11  
12 35 with antibiotic prescriptions, with the aim of reducing inappropriate use.

13  
14  
15 36 **Design:** Retrospective cohort study.

16  
17  
18 37 **Setting:** Database of public health insurance claims in Kumamoto prefecture (Japan).

19  
20  
21 38 **Participants:** Individuals who joined the national or late elders' health insurance  
22  
23  
24 39 system between April 2012 and March 2013.

25  
26  
27 40 **Main outcome measures:** Of 7,770,481 patients, 682,822 had a code for antibiotics.

28  
29  
30 41 Third-generation cephalosporins (35%), macrolides (32%), and quinolones (21%) were

31  
32  
33 42 most frequently prescribed. Acute respiratory tract infections (ARTIs), including viral

34  
35  
36 43 upper respiratory infections (URI) (22%), pharyngitis (18%), bronchitis (11%), and

37  
38  
39 44 sinusitis (10%) were most frequently diagnosed for antibiotic prescribing; then,

40  
41  
42 45 gastrointestinal infections (9%), urinary tract infections (8%); and skin, cutaneous, and

43  
44  
45 46 mucosal infections (5%). Antibiotic prescribing rates for viral URI, pharyngitis,

46  
47  
48 47 bronchitis, sinusitis, and gastrointestinal infections were 35%, 54%, 53%, 57%, and

49  
50  
51 48 30%, respectively. In multivariable analysis for ARTIs and gastrointestinal infections,

1  
2  
3  
4  
5  
6 49 patient age (10–19 years especially), gender (male), and facility scale (clinic or  
7  
8  
9 50 small-sized hospital visits) were associated with increased antibiotic prescribing.

11  
12 51 **Conclusions:** Broad-spectrum antibiotics constituted 88% of oral antibiotic  
13  
14  
15 52 prescriptions. Approximately 70% of antibiotics were prescribed for ARTIs and  
16  
17  
18 53 gastroenteritis with modest benefit from antibiotic treatment. The quality of antibiotic  
19  
20  
21 54 prescribing needs to be improved. Antimicrobial stewardship interventions should target  
22  
23  
24 55 ARTIs and gastroenteritis, as well as young patients and small-sized institution groups.  
25  
26

27 56  
28  
29  
30  
31  
32  
33  
34  
35  
36  
37  
38  
39  
40  
41  
42  
43  
44  
45  
46  
47  
48  
49  
50  
51  
52  
53  
54  
55  
56  
57  
58  
59  
60

1  
2  
3  
4  
5  
6 **57 Strength and limitations of this study**  
7

- 8  
9 • 58 This is the first Japanese study to describe antibiotic prescription patterns linked to  
10  
11  
12 59 individual diagnoses data, comprehensively, by use of the public health insurance  
13  
14  
15 60 claims database.  
16  
17  
18 • 61 This study included patients older than 65 years of age, who were hardly included  
19  
20  
21 62 in previous Japanese studies.  
22  
23  
24 • 63 The accuracy of the diagnosis has not been validated due to the nature of the  
25  
26  
27 64 administrative claims database.  
28  
29  
30  
31 • 65 There are some unmeasured potential confounding factors such as out-of-hour  
32  
33  
34 66 visits and physician specialty.  
35  
36  
37  
38  
39  
40  
41  
42  
43  
44  
45  
46  
47  
48  
49  
50  
51  
52  
53  
54  
55  
56  
57  
58  
59  
60

1  
2  
3  
4  
5  
6 **68 Introduction**  
7

8  
9 **69** There is a growing concern about infections by antimicrobial-resistant bacteria.  
10

11  
12 **70** Antimicrobial resistance results in increased health care costs, prolonged hospitalization,  
13  
14  
15 **71** and death.<sup>1-3</sup> The World Health Organization launched the global action plan to combat  
16  
17  
18 **72** the antimicrobial-resistant bacteria in 2015<sup>4</sup> and requested Member States to endorse  
19  
20  
21 **73** national action plans within two years. The government of Japan launched a national  
22  
23  
24 **74** action plan in 2016 in response to the request.<sup>5</sup>  
25  
26  
27

28 **75** Since antimicrobial use is one of the important factors in the emergence of  
29  
30  
31 **76** antimicrobial resistance,<sup>6</sup> it is essential to reduce the inappropriate use of antibiotics. In  
32  
33  
34 **77** Japan, a previous study, based on sales data, revealed that oral antibiotics accounts for  
35  
36  
37 **78** more than 90% of the total antibiotic consumption and that broad-spectrum antibiotics  
38  
39  
40 **79** (third-generation cephalosporins, macrolides, and fluoroquinolones) accounts for 77%  
41  
42  
43 **80** of oral antibiotic consumption (daily doses defined per 1,000 inhabitants per day).<sup>7</sup> The  
44  
45  
46 **81** Japanese national action plan aims to reduce the total antimicrobial use to two-thirds,  
47  
48  
49 **82** and the use of oral cephalosporins, quinolones, and macrolides to one-half, by 2020. To  
50  
51  
52 **83** accomplish the reduction of inappropriate antimicrobial use, it is important to determine  
53  
54  
55  
56  
57  
58  
59  
60



1  
2  
3  
4  
5  
6 84 the antimicrobial prescribing patterns and factors associated with antibiotic prescription.  
7  
8  
9 85 However, such information is limited in Japan to date. Although a few recent studies<sup>8,9</sup>  
10  
11  
12 86 described the prescription patterns for upper respiratory tract infections and bronchitis,  
13  
14  
15 87 the prescription patterns of infections other than acute respiratory tract infections  
16  
17  
18 88 (ARTIs) have not been clarified. In addition, patients older than 65 years of age were  
19  
20  
21 89 hardly included in these studies; because these studies relied on data from  
22  
23  
24 90 employee-based insurance claims database. With the high rate in aging population in  
25  
26  
27 91 Japan, it is important to describe the prescription patterns in the elderly.

28  
29  
30  
31 92 In this study, we described oral antibiotic prescribing patterns for all infections and in  
32  
33  
34 93 all ages, using Japanese administrative claims database. Also, we aimed to identify  
35  
36  
37 94 factors associated with antibiotic prescriptions for ARTIs and gastrointestinal infections,  
38  
39  
40 95 the targets of the antimicrobial stewardship guideline formulated by the government of  
41  
42  
43 96 Japan.<sup>10</sup>

44  
45  
46  
47 97  
48  
49  
50  
51  
52  
53  
54  
55  
56  
57  
58  
59  
60

1  
2  
3  
4  
5  
6 98 **Methods**

7  
8  
9 99 *Data sources*

10 We conducted a retrospective analysis using the administrative health insurance  
11  
12  
13  
14  
15 101 claims database of Kumamoto prefecture, situated in the southwestern region of Japan,  
16  
17  
18 102 with a population of about 1.7 million. This database covers approximately 780,000  
19  
20  
21 103 residents of Kumamoto prefecture who joined the national health insurance system (for  
22  
23  
24 104 those younger than 75 years of age),<sup>11</sup> or the late elders' health insurance system (for  
25  
26  
27 105 those aged 75 years and older).<sup>12</sup>

28  
29  
30  
31 106 The database is composed of medical (inpatient and outpatient) and pharmacy claims.  
32  
33  
34 107 It provides monthly information about patient demographics (year and month of birth  
35  
36  
37 108 and gender), diagnoses, date of diagnoses, medical procedures, medications, scale  
38  
39  
40 109 (number of beds) of the medical facility, as well as the identification numbers assigned  
41  
42  
43 110 to each individual, medical facility, and dispensing pharmacy. The diagnoses were  
44  
45  
46 111 coded according to the International Classification of Diseases and Related Health  
47  
48  
49 112 Problems, 10th Revision (ICD-10).

50  
51  
52  
53 113

1  
2  
3  
4  
5  
6 114 *Data preparation*  
7  
8

9 115 We linked the medical and pharmacy claims, on the database, using an identification  
10  
11  
12 116 number unique to each patient, medical facility, and dispensing pharmacy. We identified  
13  
14  
15 117 all newly diagnosed outpatients, with any infectious diseases, between April 2012 and  
16  
17  
18 118 March 2013. Infectious diseases diagnoses are categorized according to the indication  
19  
20  
21 119 for antibiotic use (Table S1, available as supplementary data). This categorization is  
22  
23  
24 120 based on the study by Fleming-Dutra KE *et al.*<sup>13</sup> Bronchitis and bronchiolitis were  
25  
26  
27 121 divided into two categories based on whether the patients had chronic obstructive  
28  
29  
30 122 pulmonary disease (COPD) as comorbidity or not, because of differing need of  
31  
32  
33 123 treatment with antibiotics. If a patient had multiple infectious diagnoses in one month, a  
34  
35  
36 124 single infectious diagnosis, selected in order from Group 1 (antibiotics are usually  
37  
38  
39 125 indicated) to Group 3 (antibiotics are rarely indicated), and the first-listed diagnosis in  
40  
41  
42 126 alphabetical order of ICD-10 codes in the selected group; was included in the analyses  
43  
44  
45 127 (Table S1).

46  
47  
48  
49 128 We also identified all outpatients with any antibiotic prescriptions. Topical,  
50  
51  
52 129 intramuscular, and intravenous antibiotics were excluded. Antibiotics were categorized  
53  
54  
55  
56  
57  
58  
59  
60

1  
2  
3  
4  
5  
6 130 according to the Anatomical Therapeutic Chemical (ATC) classification system  
7  
8  
9 131 (<http://www.whooc.no/atcddd/>) into: tetracyclines (J01A), penicillins (J01C), first- and  
10  
11  
12 132 second-generation cephalosporins (J01DB and J01DC), third-generation cephalosporins  
13  
14  
15 133 (J01DD), sulphonamides and trimethoprim (J01E), macrolides (J01FA), quinolones  
16  
17  
18 134 (J01M), and others (J01B, J01DH, J01DI, J01FF, J01G, and J01X). We assumed that  
19  
20  
21 135 third-generation cephalosporins accounted for most of cephalosporins used in Japan;  
22  
23  
24 136 hence, we divided cephalosporins into two groups: first/second- and third-generation  
25  
26  
27  
28 137 cephalosporins.  
29  
30

31 138

### 34 139 *Data Analysis*

36  
37 140 We calculated the frequency of antibiotic prescription for all visits with infections  
38  
39  
40 141 (according to diagnosis and antibiotic class). For ARTIs (including pharyngitis, sinusitis,  
41  
42  
43 142 bronchitis/bronchiolitis, and viral upper respiratory infections [URI]) and  
44  
45  
46 143 gastrointestinal infections separately, we performed multivariable logistic regression  
47  
48  
49  
50 144 analyses to identify the factors associated with antibiotic prescriptions. The variables  
51  
52  
53 145 were as follows: age and gender of patients and scale (number of beds) of the medical  
54  
55  
56  
57  
58  
59  
60

1  
2  
3  
4  
5  
6 146 facilities. Generalized estimating equations with exchangeable correlation structure  
7  
8  
9 147 were used to account for the clustering of the medical facilities. *P*-values < 0.05 were  
10  
11  
12 148 considered statistically significant. All statistical analyses were performed with the  
13  
14  
15 149 statistical package R, v.3.5.0 (<http://cran.r-project.org>).  
16  
17  
18  
19 150

20  
21  
22 151 *Patient involvement*  
23

24 152 No patients were involved in the development of the research question or the outcome  
25  
26  
27  
28 153 measures, nor were they involved in developing plans for design or implementation of  
29  
30  
31 154 the study. No patients were asked to advise on interpretation or writing up of results.  
32  
33  
34 155 There are no plans to disseminate the study results to the relevant patient community.  
35  
36  
37 156

1  
2  
3  
4  
5  
6 157 **Results**  
7

8  
9 158 In total, there were 7,770,481 patients between April 2012 and March 2013.  
10

11  
12 159 Antibiotics were prescribed in 682,822 patients. Among these, third-generation  
13

14  
15 160 cephalosporins were most frequently prescribed (237,372 patients, 35%), followed by  
16

17  
18 161 macrolides (215,656 patients, 32%) and quinolones (145,135 patients, 21%). This trend  
19

20  
21 162 was observed regardless of age group (Table 1) and scale of the medical facility (Table  
22

23  
24 163 2), except with those less than 9 years of age in whom the systemic use of quinolones is  
25

26  
27 164 not recommended. Information about facility scale was available from 669,086 out of  
28

29  
30 165 682,822 patients. Of these, antibiotics were prescribed most frequently at clinics  
31

32  
33 166 (530,916 patients, 79%), followed by small-sized (< 200 beds; 78,546 patients, 12%),  
34

35  
36 167 medium-sized (200–499 beds; 45,271 patients, 7%), and large-sized (500 beds or more;  
37

38  
39 168 14,353 patients, 2%) hospitals (Table 2).  
40  
41

42  
43 169 We could link the individual diagnoses to the antibiotic prescription in 447,232  
44

45  
46 170 patients (Table 3). Of these patients, approximately 60% of antibiotics were prescribed  
47

48  
49 171 for ARTIs; viral URI (96,989 patients, 22%), followed by pharyngitis (78,469 patients,  
50

51  
52 172 18%), bronchitis without COPD (47,248 patients, 11%), and sinusitis (45,456 patients,  
53

1  
2  
3  
4  
5  
6 173 10%). Other than ARTIs, there were frequent antibiotic prescriptions for gastrointestinal  
7  
8  
9 174 infections (41,309 patients, 9%), urinary tract infections (37,674 patients, 8%), and skin,  
10  
11  
12 175 cutaneous, and mucosal infections (23,572 patients, 5%). The antibiotic prescription  
13  
14  
15 176 rates for viral URI, pharyngitis, bronchitis (without underlying COPD), sinusitis, and  
16  
17  
18 177 gastrointestinal infections were 35% (96,989 out of 274,441 patients), 54% (78,469 out  
19  
20  
21 178 of 146,508 patients), 53% (47,248 out of 89,479 patients), 57% (45,456 out of 80,078  
22  
23  
24 179 patients), and 30% (41,309 out of 137,661 patients), respectively (Table 3).

25  
26  
27  
28 180 Table 4 shows the results of the logistic regression analysis about antibiotic  
29  
30  
31 181 prescription for ARTIs. Male gender was associated with more antibiotic prescription  
32  
33  
34 182 (adjusted odds ratio [OR], 1.10; 95% confidence interval [CI], 1.08 to 1.11). With  
35  
36  
37 183 patients aged 65 years or older as reference, patients aged 10 to 19 years were more  
38  
39  
40 184 likely to be prescribed antibiotics (adjusted OR, 2.75; 95% CI, 2.69 to 2.82), followed  
41  
42  
43 185 by patients aged 20 to 64 years (adjusted OR, 1.92; 95% CI, 1.89 to 1.94), and patients  
44  
45  
46 186 younger than 10 years (adjusted OR, 1.48; 95% CI, 1.46 to 1.50). With facility scale,  
47  
48  
49 187 with large-sized (500 beds or more) hospitals as reference, clinic (adjusted OR, 4.24;  
50  
51  
52 188 95% CI, 4.03 to 4.45), small-sized (< 200 beds) hospitals (adjusted OR, 2.07; 95% CI,  
53  
54  
55  
56  
57  
58  
59  
60

1  
2  
3  
4  
5  
6 189 1.97 to 2.18), and medium-sized (200–499 beds) hospitals (adjusted OR, 1.71; 95% CI,  
7  
8  
9 190 1.62 to 1.80) were significantly associated with more antibiotic prescription.

10  
11  
12 191 Similar results were shown with the logistic regression analysis for gastrointestinal  
13  
14  
15 192 infections (Table 5). Male gender was associated with slightly more antibiotic  
16  
17  
18 193 prescription (adjusted OR, 1.04; 95% CI, 1.01 to 1.06) than female gender. Patients  
19  
20  
21 194 aged 10 to 19 years (adjusted OR, 1.92; 95% CI, 1.83 to 2.00), 20 to 64 years (adjusted  
22  
23  
24 195 OR, 1.55; 95% CI, 1.51 to 1.60), and younger than 10 years (adjusted OR, 1.76; 95% CI,  
25  
26  
27 196 1.71 to 1.82) received more antibiotic prescriptions compared with patients aged 65  
28  
29  
30 197 years or older. With reference to large-sized ( $\geq 500$  beds) hospital, clinic (adjusted OR,  
31  
32  
33 198 1.88; 95% CI, 1.68 to 2.10) and small-sized ( $< 200$  beds) hospital (adjusted OR, 1.17;  
34  
35  
36 199 95% CI, 1.04 to 1.32) were associated with frequent antibiotic prescription for  
37  
38  
39 200 gastrointestinal infections.

40  
41  
42  
43 201  
44  
45  
46  
47  
48  
49  
50  
51  
52  
53  
54  
55  
56  
57  
58  
59  
60



1  
2  
3  
4  
5  
6       202    **Discussion**

7  
8  
9       203    We described oral antibiotic prescription patterns in outpatient care setting, in Japan.  
10  
11  
12       204    To the best of our knowledge, this is the first Japanese study to comprehensively  
13  
14  
15       205    describe antibiotic prescription patterns linked to individual diagnoses data, by use of  
16  
17  
18       206    the claims database. Broad-spectrum antibiotics consisting of third-generation  
19  
20  
21       207    cephalosporins, macrolides, and quinolones accounted for nearly 90% of antibiotic  
22  
23  
24       208    prescriptions in the primary care settings. Prescription of penicillin, a representative  
25  
26  
27       209    narrow-spectrum antibiotic, was only 5%. This prescription pattern is consistent with  
28  
29  
30       210    the results of an analysis of antibiotic sales data in Japan in which 77% of oral  
31  
32  
33       211    antibiotics shipped, were broad-spectrum.<sup>7</sup> In contrast, the use of cephalosporins,  
34  
35  
36       212    macrolides, and quinolones in the United States of America (USA) and Europe were  
37  
38  
39       213    much lower than Japan. Hicks *et al.*<sup>14</sup> analyzed the sales data of oral antibiotics in the  
40  
41  
42       214    USA and showed that cephalosporins, macrolides, and quinolones accounted for 48% of  
43  
44  
45       215    the total oral antibiotics. In their study, penicillin had the largest share of the antibiotics  
46  
47  
48       216    (23%). Data from the European Surveillance of Antimicrobial Consumption project<sup>15</sup>  
49  
50  
51       217    also showed that cephalosporins, macrolides, and quinolones accounted for about one  
52  
53  
54  
55  
56  
57  
58  
59  
60

1  
2  
3  
4  
5  
6 218 third of the total oral antibiotic consumptions, in Europe. This study demonstrated a  
7  
8  
9 219 rather high ratio of broad-spectrum to narrow-spectrum oral antibiotics, in Japan;  
10  
11  
12 220 therefore, the quality of antibiotic prescribing needs to be improved.  
13  
14

15 221 Among antibiotics linked with individual diagnosis data, over 60% of antibiotics were  
16  
17  
18 222 prescribed for ARTIs, followed by gastrointestinal infections (9%), urinary tract  
19  
20  
21 223 infections (8%); and skin, cutaneous, and mucosal infections (5%). Surprisingly, viral  
22  
23  
24 224 URI (common cold) was the most frequent infection associated with antibiotic  
25  
26  
27  
28 225 prescription. In the ambulatory care setting in the USA, antibiotics were prescribed  
29  
30  
31 226 most frequently for acute respiratory conditions (41–44%), followed by skin and  
32  
33  
34 227 mucosal conditions (15–19%), urinary tract infections (7–8%), and gastrointestinal  
35  
36  
37 228 conditions (5–6%).<sup>13,16</sup> Another study using primary care data in the United Kingdom  
38  
39  
40 229 (UK)<sup>17</sup> demonstrated that 46% of antibiotics were prescribed for respiratory tract  
41  
42  
43 230 conditions, followed by urogenital tract (23%), and skin conditions (10%). Only 1%  
44  
45  
46 231 was prescribed for gastrointestinal conditions. Our study demonstrated a higher  
47  
48  
49  
50 232 proportion of antibiotic prescription for ARTIs (approximately 15% higher than those in  
51  
52  
53 233 USA or UK) and gastrointestinal infections (approximately 5% higher), in Japan.  
54  
55  
56  
57  
58  
59  
60

1  
2  
3  
4  
5  
6 234 Antibiotics were prescribed for 35% of viral URI and approximately 50–60% of  
7  
8  
9 235 pharyngitis, bronchitis, and sinusitis in our study. These prescription rates were  
10  
11  
12 236 approximately similar to the USA study results;<sup>13</sup> showing a rate of 30% for viral URI,  
13  
14  
15 237 62% for pharyngitis, 65% for bronchitis, and 72% for sinusitis. Medically, antibiotics  
16  
17  
18 238 are rarely indicated for ARTIs.<sup>18</sup> Antibiotics have no role in the treatment of both viral  
19  
20  
21 239 URI (common cold) and the majority of acute bronchitis, which are caused by viral  
22  
23  
24 240 infection. Only a minority of patients with bronchitis (< 10%), for example patients who  
25  
26  
27  
28 241 have underlying COPD or whooping cough, may derive any benefit from antibiotic  
29  
30  
31 242 treatment. With pharyngitis, antibiotics are mainly indicated only for streptococcal  
32  
33  
34 243 pharyngitis, which account for 5%–15% of pharyngitis in adults and 20%–30% in  
35  
36  
37 244 children.<sup>19,20</sup>

40 245 The antibiotic prescription rate for gastrointestinal infections was 3 times higher than  
41  
42  
43 246 the rate reported in the USA (30% vs 10%).<sup>13</sup> As most acute gastroenteritis are  
44  
45  
46  
47 247 self-limiting, Japanese national guideline recommended the non-usage of antibiotics for  
48  
49  
50 248 gastroenteritis unless symptoms are severe.<sup>10</sup> Based on our study, approximately 70% of  
51  
52  
53 249 oral antibiotics are prescribed for ARTIs or acute gastroenteritis; however, most (>

1  
2  
3  
4  
5  
6 250 80%), did not require antibiotics. Therefore, there is need for suitable targets for the  
7  
8  
9 251 reduction of unnecessary antibiotic use in accordance with antimicrobial stewardship  
10  
11  
12 252 program.

13  
14  
15 253 The logistic regression analyses revealed several factors associated with antibiotic  
16  
17  
18 254 prescriptions for ARTIs and gastrointestinal infections. The smaller the facility scale,  
19  
20  
21 255 the higher the odds of antibiotic prescribing observed. Recent studies from Japan<sup>8</sup> and  
22  
23  
24 256 Taiwan<sup>21</sup> have found similar results. As family practitioners, pediatricians, and internists  
25  
26  
27  
28 257 usually prescribe a high number of antibiotic courses,<sup>14</sup> greater adherence to treatment  
29  
30  
31 258 guidelines among physicians in these specialties is particularly important. It has also  
32  
33  
34 259 been reported that mid- or late-career stage physicians (because the effect of training  
35  
36  
37 260 received during medical education might have reduced, after this long time) were more  
38  
39  
40 261 likely to prescribe antibiotics for nonbacterial acute URI.<sup>22</sup>

41  
42  
43 262 Patient age was another factor associated with antibiotic prescription. In this study,  
44  
45  
46 263 antibiotic prescription rates for ARTIs and gastrointestinal infections were highest in  
47  
48  
49 264 patients aged 10–19 years, followed by patients aged 20–64 years (ARTIs) or 0–9 years  
50  
51  
52  
53 265 (gastrointestinal infections). A previous study in Dutch primary care showed similar  
54  
55  
56  
57  
58  
59  
60

1  
2  
3  
4  
5  
6 266 results of antibiotic over-prescribing for ARTIs in patients aged 31–65 years (i.e., not in  
7  
8  
9 267 children or the elderly).<sup>23</sup> As adolescents and young adults generally pose a much lower  
10  
11  
12 268 risk of disease complications than young children or elderly, antimicrobial stewardship  
13  
14  
15 269 should be focused on these age groups of patients. In this study, male sex was also  
16  
17  
18 270 associated with increased antibiotic prescribing. Although sex difference was observed  
19  
20  
21 271 in another study, the results differed; females were more likely to have high prescribing  
22  
23  
24 272 in the USA.<sup>14</sup>

25  
26  
27  
28 273 Our study has several limitations. First, our results do not represent the entire  
29  
30  
31 274 antibiotic prescription patterns in Japan because the claims database used in this study  
32  
33  
34 275 was composed of claims in only one prefecture. Geographical diversity may be present,  
35  
36  
37 276 as observed in the previous study from the USA.<sup>14</sup> Second, since we used an  
38  
39  
40 277 administrative claims database; the accuracy of the diagnosis was not validated. In  
41  
42  
43 278 addition, we could not link diagnosis and antibiotic prescriptions on a one-to-one level  
44  
45  
46 279 when patients had multiple infectious diagnoses. Third, there may be other potential  
47  
48  
49  
50 280 confounding factors that were not included in this study. For example, information on  
51  
52  
53 281 out-of-hour visits,<sup>8</sup> non-physician practitioners or non-specialty physician,<sup>8, 21, 24</sup> and  
54  
55  
56  
57  
58  
59  
60

1  
2  
3  
4  
5  
6 282 patient's low-per capita income, black race, or low-education,<sup>14</sup> which have been  
7  
8  
9 283 reported as potential factors associated with inappropriate antibiotics prescribing, could  
10  
11  
12 284 not be extracted from the claims database in this study. Fourth, we found no follow-up  
13  
14  
15 285 visit when patients had multiple visits for a single infection. Consequently,  
16  
17  
18 286 inappropriate antibiotic prescription might be underestimated rather than overestimated.

21 287 In conclusion, this Japanese study demonstrated that third-generation cephalosporins,  
22  
23  
24 288 macrolides, and quinolones accounted for 88% of oral antibiotic prescription.  
25  
26  
27  
28 289 Approximately 60% of antibiotic prescription was provided for ARTIs, with viral URI  
29  
30  
31 290 and pharyngitis being the two ARTI diagnoses with the largest antibiotic prescriptions.  
32  
33  
34 291 Gastrointestinal infections were the second most common diagnosis for antibiotic  
35  
36  
37 292 prescribing. The scale of the facilities (clinic or small-sized hospital) and patient age  
38  
39  
40 293 (adolescents and young adults) were factors associated with antibiotic over-prescription.  
41  
42  
43 294 Antimicrobial stewardship interventions should focus on targeting antibiotic prescribing  
44  
45  
46 295 for these infectious diagnoses, and patients and institution groups. Further nationwide  
47  
48  
49 296 studies are needed to support our data, and longitudinal studies using medical-claims  
50  
51  
52 297 data are needed to evaluate the effectiveness of antimicrobial stewardship.  
53  
54  
55  
56  
57  
58  
59  
60

1  
2  
3  
4  
5  
6 298 **Authors' contributions**

7  
8  
9 299 HH and SH conceived the study, interpreted the data and results, and drafted the  
10  
11  
12 300 manuscript. HH, HM, YS, and HY collected, organized, and analyzed the data, and  
13  
14  
15 301 performed statistical analyses. KK and RN conceived the study and collected and  
16  
17  
18 302 interpreted the data. All authors critically revised the manuscript for intellectual content.  
19  
20  
21 303 All authors read and approved the final manuscript.  
22  
23  
24  
25 304

26  
27  
28 305 **Funding**

29  
30  
31 306 This work was funded by ImPACT Program of Council for Science, Technology, and  
32  
33  
34 307 Innovation (Cabinet Office, Government of Japan) and by MEXT KAKENHI, Grant  
35  
36  
37 308 Number 16K09254.  
38  
39

40 309  
41  
42  
43 310 **Competing interests**

44  
45  
46 311 None declared.  
47  
48  
49  
50 312

51  
52  
53 313 **Data sharing**

1  
2  
3  
4  
5  
6 314 No additional data available.  
7  
8

9 315  
10  
11

12 316 **Transparency declarations**  
13  
14

15 317 The lead author (the manuscript's guarantor) affirms that the manuscript is an honest,  
16  
17  
18 318 accurate, and transparent account of the study reported; that no important aspects of the  
19  
20  
21 319 study have been omitted; and that any discrepancies from the study as planned have  
22  
23  
24  
25 320 been explained.  
26  
27

28 321  
29  
30

31 322 **Ethical approval**  
32  
33

34 323 This study was approved by the Ethics Committee of the Jichi Medical University  
35  
36  
37 324 (Number 17-002).  
38  
39  
40  
41  
42  
43  
44  
45  
46  
47  
48  
49  
50  
51  
52  
53  
54  
55  
56  
57  
58  
59  
60



325 **Table 1.** Frequency of oral antibiotic prescriptions by age and antibiotic groups

326

| Antibiotic groups<br>coded by ATC* classification** | Number of visits with antibiotic prescription |        |         |         |          |
|-----------------------------------------------------|-----------------------------------------------|--------|---------|---------|----------|
|                                                     | Age Group, y                                  |        |         |         |          |
|                                                     | 0–9                                           | 10–19  | 20–64   | ≥ 65    | All ages |
| Penicillins                                         | 7,495                                         | 1,724  | 8,574   | 14,924  | 32,717   |
| First/second-generation cephalosporins              | 964                                           | 411    | 2,987   | 5,719   | 10,081   |
| Third-generation cephalosporins                     | 52,082                                        | 16,367 | 60,621  | 108,302 | 237,372  |
| Macrolides                                          | 28,597                                        | 14,691 | 56,719  | 115,649 | 215,656  |
| Quinolones                                          | 7,286                                         | 4,158  | 48,843  | 84,848  | 145,135  |
| Sulphonamides and trimethoprim                      | 32                                            | 53     | 1,389   | 4,520   | 5,994    |
| Tetracyclines                                       | 915                                           | 1,366  | 4,366   | 5,147   | 11,794   |
| Other antibiotics                                   | 6,901                                         | 2,021  | 7,186   | 7,965   | 24,073   |
| All antibiotics                                     | 104,272                                       | 40,791 | 190,685 | 347,074 | 682,822  |

327 \*ATC: Anatomical Therapeutic Chemical

328 \*\*Penicillins, J01C; First-generation cephalosporins, J01DB; Second-generation cephalosporins,

329 J01DC; Third-generation cephalosporins, J01DD; Macrolides, J01FA; Quinolones, J01M;

330 Sulphonamides and trimethoprim, J01E; Tetracyclines, J01A; Other antibiotics, J01B, J01DH,

331 J01DI, J01FF, J01G, and J01X

332 **Table 2.** Frequency of oral antibiotic prescriptions by facility scale and antibiotic group\*

333

| Antibiotic groups<br>coded by ATC** classification*** | Number of visits with antibiotic prescription |                             |                                |                             |                |
|-------------------------------------------------------|-----------------------------------------------|-----------------------------|--------------------------------|-----------------------------|----------------|
|                                                       | Facility scale (clinic and hospitals)         |                             |                                |                             | All facilities |
|                                                       | Clinic                                        | Small-sized (< 200<br>beds) | Medium-sized (200–499<br>beds) | Large-sized (≥ 500<br>beds) |                |
| Penicillins                                           | 25,225                                        | 3,453                       | 2,968                          | 565                         | 32,211         |
| First/second-generation cephalosporins                | 6,755                                         | 1,789                       | 1,245                          | 158                         | 9947           |
| Third-generation cephalosporins                       | 187,928                                       | 25,463                      | 15,252                         | 4,139                       | 232,782        |
| Macrolides                                            | 169,980                                       | 26,307                      | 11,319                         | 3,833                       | 211,439        |
| Quinolones                                            | 110,770                                       | 17,877                      | 9,992                          | 3,402                       | 142,041        |
| Sulphonamides and trimethoprim                        | 712                                           | 1,069                       | 2,234                          | 1,618                       | 5,633          |
| Tetracyclines                                         | 9,477                                         | 846                         | 803                            | 320                         | 11,446         |
| Other antibiotics                                     | 20,069                                        | 1,742                       | 1,458                          | 318                         | 23,587         |
| All antibiotics                                       | 530,916                                       | 78,546                      | 45,271                         | 14,353                      | 669,086        |

334 \*13,736 patients with antibiotic prescription were excluded due to missing data about facility scale.

335 \*\*ATC: Anatomical Therapeutic Chemical

336 \*\*\*Penicillins, J01C; First-generation cephalosporins, J01DB; Second-generation cephalosporins, J01DC; Third-generation cephalosporins, J01DD;

337 Macrolides, J01FA; Quinolones, J01M; Sulphonamides and trimethoprim, J01E; Tetracyclines, J01A; Other antibiotics, J01B, J01DH, J01DI, J01FF,

338 J01G, and J01X

339 **Table 3.** Frequency of oral antibiotic prescriptions by antibiotic groups and diagnoses

340

| Diagnoses                              | All visits | Visits with any antibiotic prescription and prescription rate (%) | Number of visits with antibiotic prescriptions by antibiotic groups* |                                         |                        |             |             |      |               |                   |
|----------------------------------------|------------|-------------------------------------------------------------------|----------------------------------------------------------------------|-----------------------------------------|------------------------|-------------|-------------|------|---------------|-------------------|
|                                        |            |                                                                   | Penicillins                                                          | 1 <sup>st</sup> /2 <sup>nd</sup> cephem | 3 <sup>rd</sup> cephem | Macrolide s | Quinolone s | ST   | Tetracyclines | Other antibiotics |
| Miscellaneous bacterial infections     | 45,061     | 20,429 (45.3)                                                     | 2,969                                                                | 468                                     | 7,404                  | 7,868       | 5,731       | 181  | 444           | 728               |
| STD                                    | 14,051     | 3,931 (28.0)                                                      | 86                                                                   | 76                                      | 836                    | 1515        | 496         | 14   | 147           | 1,260             |
| Bacterial Pneumonia                    | 47,035     | 21,473 (45.7)                                                     | 916                                                                  | 121                                     | 5,044                  | 8,568       | 11,236      | 191  | 238           | 316               |
| Abdominal infection                    | 9,208      | 2,077 (22.6)                                                      | 69                                                                   | 29                                      | 680                    | 142         | 1,086       | ≤ 10 | ≤ 10          | 177               |
| Orthopedic infection                   | 1,749      | 380 (21.7)                                                        | 36                                                                   | 22                                      | 225                    | 21          | 93          | ≤ 10 | 19            | 22                |
| Urinary tract infections               | 97,948     | 37,674 (38.5)                                                     | 1,195                                                                | 567                                     | 14,735                 | 1,998       | 20,229      | 429  | 521           | 1,232             |
| PID                                    | 11,621     | 1,763 (15.2)                                                      | 84                                                                   | 26                                      | 1127                   | 164         | 167         | ≤ 10 | ≤ 10          | 273               |
| GI infections                          | 137,661    | 41,309 (30.0)                                                     | 2,121                                                                | 264                                     | 12,060                 | 8603        | 13206       | 196  | 232           | 9,680             |
| Skin, cutaneous and mucosal infections | 62,202     | 23,572 (37.9)                                                     | 1,167                                                                | 1,337                                   | 15,311                 | 1,975       | 2,848       | 25   | 997           | 1,615             |
| Suppurative otitis media               | 16,059     | 9,958 (62.0)                                                      | 1,566                                                                | 18                                      | 5,213                  | 1,972       | 3,654       | ≤ 10 | 92            | 812               |

|                             |         |               |       |      |        |        |        |      |       |      |
|-----------------------------|---------|---------------|-------|------|--------|--------|--------|------|-------|------|
| Pharyngitis                 | 146,508 | 78,469 (53.6) | 4,372 | 450  | 35,958 | 27,454 | 16,387 | 121  | 301   | 976  |
| Sinusitis                   | 80,078  | 45,456 (56.8) | 3,654 | 481  | 15,282 | 20,677 | 11,441 | ≤ 10 | 779   | 766  |
| Bronchitis with COPD        | 6,832   | 4,313 (63.1)  | 208   | 14   | 912    | 2,178  | 1,762  | 28   | 11    | 17   |
| Acne                        | 6,939   | 2,030 (29.3)  | ≤ 10  | 32   | 174    | 739    | 41     | ≤ 10 | 1,050 | 62   |
| Nonbacterial GI infections  | 1,215   | 116 (9.5)     | ≤ 10  | ≤ 10 | 42     | 38     | 33     | ≤ 10 | ≤ 10  | 14   |
| Nonsuppurative otitis media | 2,807   | 888 (31.6)    | 63    | ≤ 10 | 384    | 481    | 128    | ≤ 10 | ≤ 10  | 26   |
| Viral URI                   | 274,441 | 96,989 (35.3) | 4,839 | 825  | 44,475 | 37,001 | 16,941 | 160  | 790   | 601  |
| Influenza                   | 22,868  | 8,665 (37.9)  | 296   | 74   | 3,030  | 3,934  | 2,040  | ≤ 10 | 47    | 69   |
| Viral pneumonia             | 15      | ≤ 10          | ≤ 10  | ≤ 10 | ≤ 10   | ≤ 10   | ≤ 10   | ≤ 10 | ≤ 10  | ≤ 10 |
| Bronchitis without COPD     | 89,479  | 47,248 (52.8) | 1,509 | 332  | 14,521 | 22,779 | 11,078 | 58   | 250   | 346  |
| Noninfectious diarrhea      | 1,597   | 50 (3.1)      | ≤ 10  | ≤ 10 | ≤ 10   | 19     | 15     | ≤ 10 | ≤ 10  | ≤ 10 |
| Fever                       | 2,908   | 438 (15.1)    | 20    | ≤ 10 | 190    | 103    | 156    | ≤ 10 | ≤ 10  | ≤ 10 |

341 1<sup>st</sup>/2<sup>nd</sup> cephem, first/second-generation cephalosporins; 3<sup>rd</sup> cephem, third-generation cephalosporins; ST, Sulphonamides and trimethoprim; STD, sexual  
 342 transmitted diseases; PID, pelvic inflammatory diseases; GI infections, gastrointestinal infections; COPD, chronic obstructive pulmonary disease; URI,  
 343 upper respiratory infections

344 \*Antibiotics were coded according to Anatomical Therapeutic Chemical (ATC) codes: Penicillins, J01C; First-generation cephalosporins, J01DB;  
 345 Second-generation cephalosporins, J01DC; Third-generation cephalosporins, J01DD; Macrolides, J01FA; Quinolones, J01M; Sulphonamides and

1  
2  
3  
4  
5  
6  
7  
8  
9  
10  
11  
12  
13  
14  
15  
16  
17  
18  
19  
20  
21  
22  
23  
24  
25  
26  
27  
28  
29  
30  
31  
32  
33  
34  
35  
36  
37  
38  
39  
40  
41  
42  
43  
44  
45  
46  
47

346 trimethoprim, J01E; Tetracyclines, J01A; Other antibiotics, J01B, J01DH, J01DI, J01FF, J01G, and J01X

For peer review only

347 **Table 4.** Factors associated with antibiotic prescription for acute upper respiratory infections\*

348

| Characteristics         | Antibiotic prescription, n (%) | Unadjusted odds ratio (95% CI) | Adjusted odds ratio (95% CI) |
|-------------------------|--------------------------------|--------------------------------|------------------------------|
| <b>Patient age</b>      |                                |                                |                              |
| 0–9                     | 44,413 (50.4)                  | 1.66 (1.64 to 1.69)            | 1.48 (1.46 to 1.50)          |
| 10–19                   | 20,822 (65.1)                  | 3.08 (3.00 to 3.15)            | 2.75 (2.69 to 2.82)          |
| 20–64                   | 85,952 (54.6)                  | 1.98 (1.95 to 2.00)            | 1.92 (1.89 to 1.94)          |
| ≥ 65                    | 121,289 (37.9)                 | 1                              | 1                            |
| <b>Patient sex</b>      |                                |                                |                              |
| Male                    | 112,643 (47.4)                 | 1.13 (1.12 to 1.14)            | 1.10 (1.08 to 1.11)          |
| Female                  | 155,038 (44.4)                 | 1                              | 1                            |
| <b>Facility scale</b>   |                                |                                |                              |
| Clinic                  | 233,078 (49.8)                 | 4.48 (4.27 to 4.70)            | 4.24 (4.03 to 4.45)          |
| Hospital (< 200 beds)   | 23,012 (30.8)                  | 2.01 (1.91 to 2.11)            | 2.07 (1.97 to 2.18)          |
| Hospital (200–499 beds) | 9,327 (28.2)                   | 1.77 (1.68 to 1.89)            | 1.71 (1.62 to 1.80)          |
| Hospital (≥ 500 beds)   | 2,064 (18.2)                   | 1                              | 1                            |

349 CI, confidence interval

350 \*Acute upper respiratory infections include viral upper respiratory infections, pharyngitis, bronchitis, and sinusitis.

351 **Table 5.** Factors associated with antibiotic prescription for gastrointestinal infections.

352

| Characteristics         | Antibiotic prescription, n (%) | Unadjusted odds ratio (95% CI) | Adjusted odds ratio (95% CI) |
|-------------------------|--------------------------------|--------------------------------|------------------------------|
| <b>Patient age</b>      |                                |                                |                              |
| 0–9                     | 10,809 (37.0)                  | 1.92 (1.86 to 1.98)            | 1.76 (1.71 to 1.82)          |
| 10–19                   | 4,395 (38.7)                   | 2.07 (1.98 to 2.16)            | 1.92 (1.83 to 2.00)          |
| 20–64                   | 12,310 (32.4)                  | 1.57 (1.53 to 1.61)            | 1.55 (1.51 to 1.60)          |
| ≥ 65                    | 13,795 (23.4)                  | 1                              | 1                            |
| <b>Patient sex</b>      |                                |                                |                              |
| Male                    | 59,937 (30.9)                  | 1.09 (1.06 to 1.12)            | 1.04 (1.01 to 1.06)          |
| Female                  | 74,902 (29.1)                  | 1                              | 1                            |
| <b>Facility type</b>    |                                |                                |                              |
| Clinic                  | 33,712 (32.9)                  | 2.03 (1.82 to 2.27)            | 1.88 (1.68 to 2.10)          |
| Hospital (< 200 beds)   | 4,056 (21.7)                   | 1.15 (1.02 to 1.29)            | 1.17 (1.04 to 1.32)          |
| Hospital (200–499 beds) | 2,214 (18.9)                   | 0.97 (0.86 to 1.09)            | 0.93 (0.82 to 1.05)          |
| Hospital (≥ 500 beds)   | 396 (19.4)                     | 1                              | 1                            |

353 CI, confidence interval

1  
2  
3  
4  
5  
6 **354 References**  
7

- 8  
9 355 1. de Kraker ME, Wolkewitz M, Davey PG et al. Clinical impact of antimicrobial  
10  
11  
12 356 resistance in European hospitals: excess mortality and length of hospital stay related to  
13  
14  
15 357 methicillin-resistant *Staphylococcus aureus* bloodstream infections. *Antimicrob Agents*  
16  
17  
18 358 *Chemother* 2011; 55: 1598-605.  
19  
20  
21 359 2. Stewardson AJ, Allignol A, Beyersmann J et al. The health and economic burden of  
22  
23  
24 360 bloodstream infections caused by antimicrobial-susceptible and non-susceptible  
25  
26  
27  
28 361 *Enterobacteriaceae* and *Staphylococcus aureus* in European hospitals, 2010 and 2011: a  
29  
30  
31 362 multicentre retrospective cohort study. *Euro Surveill* 2016; 21: pii=30319.  
32  
33  
34 363 3. Ammerlaan HS, Harbarth S, Buiting AG et al. Secular trends in nosocomial  
35  
36  
37 364 bloodstream infections: antibiotic-resistant bacteria increase the total burden of  
38  
39  
40  
41 365 infection. *Clin Infect Dis* 2013; 56: 798-805.  
42  
43  
44 366 4. World Health Organization. Global action plan on antimicrobial resistance. Available  
45  
46  
47 367 at: [http://apps.who.int/iris/bitstream/10665/193736/1/9789241509763\\_eng.pdf?ua=1](http://apps.who.int/iris/bitstream/10665/193736/1/9789241509763_eng.pdf?ua=1)  
48  
49  
50 368 (Accessed: August 3, 2018).  
51  
52  
53 369 5. The Government of Japan. National Action Plan on Antimicrobial Resistance (AMR)  
54  
55



- 1  
2  
3  
4  
5  
6 370 2016-2020. Available at:  
7  
8  
9 371 <https://www.mhlw.go.jp/file/06-Seisakujouhou-10900000-Kenkoukyoku/0000138942.p>  
10  
11  
12 372 df. (Accessed: August 3, 2018).  
13  
14  
15 373 6. Tacconelli E. Antimicrobial use: risk driver of multidrug resistant microorganisms in  
16  
17  
18 374 healthcare settings. *Curr Opin Infect Dis* 2009; 22: 352-8.  
19  
20  
21 375 7. Muraki Y, Yagi T, Tsuji Y et al. Japanese antimicrobial consumption surveillance:  
22  
23  
24 376 First report on oral and parenteral antimicrobial consumption in Japan (2009-2013). *J*  
25  
26  
27 377 *Glob Antimicrob Resist* 2016; 7: 19-23.  
28  
29  
30  
31 378 8. Yoshida S, Takeuchi M, Kawakami K. Prescription of antibiotics to pre-school  
32  
33  
34 379 children from 2005 to 2014 in Japan: a retrospective claims database study. *J Public*  
35  
36  
37 380 *Health (Oxf)* 2018; 40: 397-403.  
38  
39  
40 381 9. Higashi T, Fukuhara S. Antibiotic prescriptions for upper respiratory tract infection in  
41  
42  
43 382 Japan. *Intern Med* 2009; 48: 1369-75.  
44  
45  
46  
47 383 10. The Government of Japan, Ministry of Health, Labour and Welfare. Manual  
48  
49  
50 384 of Antimicrobial Stewardship (1st Edition). Available at: <http://www.mhlw.go.jp/file>  
51  
52  
53 385 [e/06-Seisakujouhou-10900000-Kenkoukyoku/0000193504.pdf](http://www.mhlw.go.jp/file/06-Seisakujouhou-10900000-Kenkoukyoku/0000193504.pdf). (Accessed: August 3,  
54  
55

1  
2  
3  
4  
5  
6 386 2018).

7  
8  
9 387 11. Kumamoto prefectural government. 2012 Kumamoto National Health Insuranc  
10  
11  
12 388 e business situation report. Available at: <http://www.pref.kumamoto.jp.e.qp.hp.trans>  
13  
14  
15 389 er.com/kiji\_2735.html (Accessed: August 3, 2018).

16  
17  
18 390 12. Kumamoto prefectural government. The situation such as Kumamoto elderly  
19  
20  
21 391 aged 75 or over medical expenses. Available at: <http://www.pref.kumamoto.jp.e.qp>.  
22  
23  
24 392 hp.transer.com/kiji\_13777.html (Accessed: August 3, 2018).

25  
26  
27  
28 393 13. Fleming-Dutra KE, Hersh AL, Shapiro DJ et al. Prevalence of Inappropriate  
29  
30  
31 394 Antibiotic Prescriptions Among US Ambulatory Care Visits, 2010-2011. JAMA 2016;  
32  
33  
34 395 315: 1864-73.

35  
36  
37 396 14. Hicks LA, Bartoces MG, Roberts RM et al. US outpatient antibiotic prescribing  
38  
39  
40 397 variation according to geography, patient population, and provider specialty in 2011.  
41  
42  
43 398 Clin Infect Dis 2015; 60: 1308-16.

44  
45  
46 399 15. ESAC-Net surveillance data. Surveillance of antimicrobial consumption in Europe.  
47  
48  
49 400 Available at:  
50  
51  
52 401 <http://ecdc.europa.eu/en/publications/Publications/antimicrobial-consumption-europe-es>  
53  
54

55 32  
56  
57  
58  
59  
60

1  
2  
3  
4  
5  
6 402 ac-net-2012.pdf (Accessed: August 3, 2018).  
7

8  
9 403 16. Shapiro DJ, Hicks LA, Pavia AT et al. Antibiotic prescribing for adults in  
10  
11  
12 404 ambulatory care in the USA, 2007-09. *J Antimicrob Chemother* 2014; 69: 234-40.  
13

14  
15 405 17. Dolk FCK, Pouwels KB, Smith DRM et al. Antibiotics in primary care in  
16  
17  
18 406 England: which antibiotics are prescribed and for which conditions? *J Antimicrob*  
19  
20  
21 407 *Chemother* 2018; 73: ii2-ii10.  
22

23  
24 408 18. Harris AM, Hicks LA, Qaseem A. Appropriate Antibiotic Use for Acute Respiratory  
25  
26  
27 409 Tract Infection in Adults: Advice for High-Value Care From the American College of  
28  
29  
30 410 Physicians and the Centers for Disease Control and Prevention. *Ann Intern Med* 2016;  
31  
32  
33 411 164: 425-434.  
34

35  
36  
37 412 19. Bisno AL. Acute pharyngitis: etiology and diagnosis. *Pediatrics* 1996; 97: 949-54.  
38

39  
40 413 20. Ebell MH, Smith MA, Barry HC et al. The rational clinical examination. Does this  
41  
42  
43 414 patient have strep throat? *JAMA* 2000; 284: 2912-8.  
44

45  
46 415 21. Lee ML, Cho CY, Hsu CL, et al. Recent trends in antibiotic prescriptions for acute  
47  
48  
49 416 respiratory tract infections in pediatric ambulatory care in Taiwan, 2000-2009: A  
50  
51  
52 417 nationwide population-based study. *J Microbiol Immunol Infect* 2016; 49: 554-560.  
53

- 1  
2  
3  
4  
5  
6 418 22. Silverman M, Povitz M, Sontrop JM, et al. Antibiotic Prescribing for Nonbacterial  
7  
8  
9 419 Acute Upper Respiratory Infections in Elderly Persons. *Ann Intern Med* 2017; 166:  
10  
11  
12 420 765-774.
- 15 421 23. Akkerman AE, van der Wouden JC, Kuyvenhoven MM et al. Antibiotic prescribing  
16  
17  
18 422 for respiratory tract infections in Dutch primary care in relation to patient age and  
19  
20  
21 423 clinical entities. *J Antimicrob Chemother* 2004; 54: 1116-1121.
- 24 424 24. Schmidt ML, Spencer MD, Davidson LE. Patient, Provider, and Practice  
25  
26  
27 425 Characteristics Associated with Inappropriate Antimicrobial Prescribing in Ambulatory  
28  
29  
30 426 Practices. *Infect Control Hosp Epidemiol*. 2018; 39:307-315.
- 31  
32  
33  
34  
35  
36  
37  
38  
39  
40  
41  
42  
43  
44  
45  
46  
47  
48  
49  
50  
51  
52  
53  
54  
55  
56  
57  
58  
59  
60

1 **Table S1.** Classification of infections by groups with corresponding ICD-10 codes  
 2

|                                                                        | Diagnosis                          | ICD-10 codes                                                                                                                                                                                                                                                                                                                                                                                                                                                                                                                                                                                                                                                            |
|------------------------------------------------------------------------|------------------------------------|-------------------------------------------------------------------------------------------------------------------------------------------------------------------------------------------------------------------------------------------------------------------------------------------------------------------------------------------------------------------------------------------------------------------------------------------------------------------------------------------------------------------------------------------------------------------------------------------------------------------------------------------------------------------------|
| <b>Group 1: Infections for which antibiotics are usually indicated</b> |                                    |                                                                                                                                                                                                                                                                                                                                                                                                                                                                                                                                                                                                                                                                         |
| 1                                                                      | Miscellaneous bacterial infections | Tuberculosis (A15–A19); Certain zoonotic bacterial diseases (A20–A28); Other bacterial diseases including listeriosis, diphtheria, bartonellosis, erysipelas, and rickettsioses (A30–A37, A39–A49, A75–A79); Bacterial meningitis, encephalitis, and intracranial abscess (G00, G042, G049, G06); Mastoiditis (H70); Infective endocarditis (I33, T826); Acute epiglottitis (J051); Deep neck space infections (J36, J390, J391); Abscess of lung and mediastinum; Pyothorax (J85, J86); Infections of the jaws and mouth (K102, K122); Infections due to cardiac and vascular devices (T827); Infection due to internal prosthetic devices, implants and grafts (T857) |
| 2                                                                      | Sexually transmitted infections    | Infections with a predominantly sexual mode of transmission (A50–A64); Other spirochetal diseases (A65–A69); Other diseases caused by chlamydia (A70–A74)                                                                                                                                                                                                                                                                                                                                                                                                                                                                                                               |
| 3                                                                      | Pneumonia                          | Bacterial pneumonia (J13–J18)                                                                                                                                                                                                                                                                                                                                                                                                                                                                                                                                                                                                                                           |
| 4                                                                      | Abdominal infections               | Acute appendicitis (K35); Abscess of anal and rectal regions, intestine, and liver (K61, K630, K750); Peritonitis (K65); Cholecystitis and cholangitis (K800, K801, K803, K804, K810, K819, K830)                                                                                                                                                                                                                                                                                                                                                                                                                                                                       |
| 5                                                                      | Orthopedic infections              | Pyogenic arthritis and prosthetic joint infection (M00, T845); necrotizing fasciitis (M726); Infective myositis, synovitis and bursitis (M600, M650–M651, M710–M711); Osteomyelitis (M462–M465, M86)                                                                                                                                                                                                                                                                                                                                                                                                                                                                    |
| 6                                                                      | Urinary tract infections           | Acute pyelonephritis/pyonephrosis ((N10, N12, N136); Renal abscess (N151); Kidney infection, unspecified (N159); Acute cystitis (N300); Cystitis, unspecified (N308, N309); Urethritis and urethral abscess (N34); Urinary tract infections, unspecified (N390); Prostatitis and abscess of prostate (N41); Orchitis and epididymitis (N45); Catheter associated urinary tract infections (T835)                                                                                                                                                                                                                                                                        |

|   |                              |                                                                                                               |
|---|------------------------------|---------------------------------------------------------------------------------------------------------------|
| 7 | Pelvic inflammatory diseases | Pelvic inflammatory diseases (N70–N73, N751, N760–N764); Infections of genitourinary tract in pregnancy (O23) |
|---|------------------------------|---------------------------------------------------------------------------------------------------------------|

### Group 2 : Infections for which antibiotics are potentially indicated

|   |                                        |                                                                                                                                                                                                                                                                                           |
|---|----------------------------------------|-------------------------------------------------------------------------------------------------------------------------------------------------------------------------------------------------------------------------------------------------------------------------------------------|
| 1 | Gastrointestinal infections            | Intestinal infectious diseases (A00–A07, A09); Diverticulitis of intestine (K57)                                                                                                                                                                                                          |
| 2 | Skin, cutaneous and mucosal infections | Infections of other skin and subcutaneous tissue including cellulitis, cutaneous abscess, furuncle, carbuncle, impetigo, acute lymphadenitis, folliculitis, mastitis (H050, J340, L00–L08, N61, T814); Infections of the eye and adnexa (H00, H440); Infective otitis externa (H600–H603) |
| 3 | Suppurative otitis media               | Suppurative and unspecified otitis media (H66)                                                                                                                                                                                                                                            |
| 4 | Pharyngitis                            | Streptococcal pharyngitis/tonsillitis (J020, J030); Acute pharyngitis/tonsillitis, unspecified (J029, J039); Scarlet fever (A38)                                                                                                                                                          |
| 5 | Sinusitis                              | Acute sinusitis (J01); Chronic sinusitis (J32)                                                                                                                                                                                                                                            |
| 6 | Bronchitis and bronchiolitis with COPD | Acute bronchitis (J20) *; Acute bronchiolitis (J21) *; Unspecified acute lower respiratory infection (J22) *                                                                                                                                                                              |
| 7 | Acne                                   | Acne (L70)                                                                                                                                                                                                                                                                                |

### Group 3: Infections for which antibiotics are rarely indicated

|   |                                           |                                                                                                                                                                                                                                                                                                     |
|---|-------------------------------------------|-----------------------------------------------------------------------------------------------------------------------------------------------------------------------------------------------------------------------------------------------------------------------------------------------------|
| 1 | Nonbacterial gastrointestinal infections  | Viral and other specified intestinal infections (A08)                                                                                                                                                                                                                                               |
| 2 | Nonsuppurative otitis media               | Nonsuppurative otitis media (H65)                                                                                                                                                                                                                                                                   |
| 3 | Viral upper respiratory infection         | Acute nasopharyngitis [common cold] (J00); Acute pharyngitis/tonsillitis due to other specified organisms (J028, J038); Acute laryngitis and tracheitis (J04); Acute obstructive laryngitis [croup] (J050); Acute upper respiratory infections of multiple and unspecified sites (J06); Cough (R05) |
| 4 | Influenza                                 | Influenza (J10, J11)                                                                                                                                                                                                                                                                                |
| 5 | Viral pneumonia                           | Viral pneumonia (J12)                                                                                                                                                                                                                                                                               |
| 6 | Bronchitis and bronchiolitis without COPD | Acute bronchitis (J20) **; Acute bronchiolitis (J21) **; Unspecified acute lower respiratory infection (J22) **                                                                                                                                                                                     |
| 7 | Noninfectious diarrhea                    | Noninfective gastroenteritis and colitis, unspecified (K529)                                                                                                                                                                                                                                        |

1  
2  
3  
4  
5  
6  
7  
8  
9  
10  
11  
12  
13  
14  
15  
16  
17  
18  
19  
20  
21  
22  
23  
24  
25  
26  
27  
28  
29  
30  
31  
32  
33  
34  
35  
36  
37  
38  
39  
40  
41  
42  
43  
44  
45  
46  
47  
48  
49  
50  
51  
52  
53  
54  
55  
56  
57  
58  
59  
60

|   |       |                               |
|---|-------|-------------------------------|
| 8 | Fever | Fever of unknown origin (R50) |
|---|-------|-------------------------------|

3 \*includes visits in which ICD-10 code for COPD (J41–J44) are present

4 \*\*includes visits in which ICD-10 code for COPD (J41–J44) are not present

For peer review only

## STROBE Statement—checklist of items that should be included in reports of observational studies

|                              | Item No | Recommendation                                                                                                                                                                                                                                                                                                                                                                                                                                                         | Page No |
|------------------------------|---------|------------------------------------------------------------------------------------------------------------------------------------------------------------------------------------------------------------------------------------------------------------------------------------------------------------------------------------------------------------------------------------------------------------------------------------------------------------------------|---------|
| <b>Title and abstract</b>    | 1       | (a) Indicate the study's design with a commonly used term in the title or the abstract                                                                                                                                                                                                                                                                                                                                                                                 | 1       |
|                              |         | (b) Provide in the abstract an informative and balanced summary of what was done and what was found                                                                                                                                                                                                                                                                                                                                                                    | 3       |
| <b>Introduction</b>          |         |                                                                                                                                                                                                                                                                                                                                                                                                                                                                        |         |
| Background/rationale         | 2       | Explain the scientific background and rationale for the investigation being reported                                                                                                                                                                                                                                                                                                                                                                                   | 5       |
| Objectives                   | 3       | State specific objectives, including any prespecified hypotheses                                                                                                                                                                                                                                                                                                                                                                                                       | 6       |
| <b>Methods</b>               |         |                                                                                                                                                                                                                                                                                                                                                                                                                                                                        |         |
| Study design                 | 4       | Present key elements of study design early in the paper                                                                                                                                                                                                                                                                                                                                                                                                                | 7       |
| Setting                      | 5       | Describe the setting, locations, and relevant dates, including periods of recruitment, exposure, follow-up, and data collection                                                                                                                                                                                                                                                                                                                                        | 7–8     |
| Participants                 | 6       | (a) <i>Cohort study</i> —Give the eligibility criteria, and the sources and methods of selection of participants. Describe methods of follow-up<br><i>Case-control study</i> —Give the eligibility criteria, and the sources and methods of case ascertainment and control selection. Give the rationale for the choice of cases and controls<br><i>Cross-sectional study</i> —Give the eligibility criteria, and the sources and methods of selection of participants | 9       |
|                              |         | (b) <i>Cohort study</i> —For matched studies, give matching criteria and number of exposed and unexposed<br><i>Case-control study</i> —For matched studies, give matching criteria and the number of controls per case                                                                                                                                                                                                                                                 |         |
| Variables                    | 7       | Clearly define all outcomes, exposures, predictors, potential confounders, and effect modifiers. Give diagnostic criteria, if applicable                                                                                                                                                                                                                                                                                                                               | 9       |
| Data sources/<br>measurement | 8*      | For each variable of interest, give sources of data and details of methods of assessment (measurement). Describe comparability of assessment methods if there is more than one group                                                                                                                                                                                                                                                                                   | 8–9     |
| Bias                         | 9       | Describe any efforts to address potential sources of bias                                                                                                                                                                                                                                                                                                                                                                                                              |         |
| Study size                   | 10      | Explain how the study size was arrived at                                                                                                                                                                                                                                                                                                                                                                                                                              |         |
| Quantitative variables       | 11      | Explain how quantitative variables were handled in the analyses. If applicable, describe which groupings were chosen and why                                                                                                                                                                                                                                                                                                                                           |         |
| Statistical methods          | 12      | (a) Describe all statistical methods, including those used to control for confounding                                                                                                                                                                                                                                                                                                                                                                                  | 9–10    |
|                              |         | (b) Describe any methods used to examine subgroups and interactions                                                                                                                                                                                                                                                                                                                                                                                                    | 9–10    |
|                              |         | (c) Explain how missing data were addressed                                                                                                                                                                                                                                                                                                                                                                                                                            |         |
|                              |         | (d) <i>Cohort study</i> —If applicable, explain how loss to follow-up was addressed<br><i>Case-control study</i> —If applicable, explain how matching of cases and controls was addressed<br><i>Cross-sectional study</i> —If applicable, describe analytical methods taking account of sampling strategy                                                                                                                                                              |         |
|                              |         | (e) Describe any sensitivity analyses                                                                                                                                                                                                                                                                                                                                                                                                                                  |         |

Continued on next page



1  
2  
3  
4  
5  
6  
7  
8  
9  
10  
11  
12  
13  
14  
15  
16  
17  
18  
19  
20  
21  
22  
23  
24  
25  
26  
27  
28  
29  
30  
31  
32  
33  
34  
35  
36  
37  
38  
39  
40  
41  
42  
43  
44  
45  
46  
47  
48  
49  
50  
51  
52  
53  
54  
55  
56  
57  
58  
59  
60

| <b>Results</b>           |     |                                                                                                                                                                                                              |           |
|--------------------------|-----|--------------------------------------------------------------------------------------------------------------------------------------------------------------------------------------------------------------|-----------|
| Participants             | 13* | (a) Report numbers of individuals at each stage of study—eg numbers potentially eligible, examined for eligibility, confirmed eligible, included in the study, completing follow-up, and analysed            | 11        |
|                          |     | (b) Give reasons for non-participation at each stage                                                                                                                                                         |           |
|                          |     | (c) Consider use of a flow diagram                                                                                                                                                                           |           |
| Descriptive data         | 14* | (a) Give characteristics of study participants (eg demographic, clinical, social) and information on exposures and potential confounders                                                                     | 11        |
|                          |     | (b) Indicate number of participants with missing data for each variable of interest                                                                                                                          |           |
|                          |     | (c) <i>Cohort study</i> —Summarise follow-up time (eg, average and total amount)                                                                                                                             |           |
| Outcome data             | 15* | <i>Cohort study</i> —Report numbers of outcome events or summary measures over time                                                                                                                          | 11        |
|                          |     | <i>Case-control study</i> —Report numbers in each exposure category, or summary measures of exposure                                                                                                         |           |
|                          |     | <i>Cross-sectional study</i> —Report numbers of outcome events or summary measures                                                                                                                           |           |
| Main results             | 16  | (a) Give unadjusted estimates and, if applicable, confounder-adjusted estimates and their precision (eg, 95% confidence interval). Make clear which confounders were adjusted for and why they were included | 12–<br>13 |
|                          |     | (b) Report category boundaries when continuous variables were categorized                                                                                                                                    |           |
|                          |     | (c) If relevant, consider translating estimates of relative risk into absolute risk for a meaningful time period                                                                                             |           |
| Other analyses           | 17  | Report other analyses done—eg analyses of subgroups and interactions, and sensitivity analyses                                                                                                               |           |
| <b>Discussion</b>        |     |                                                                                                                                                                                                              |           |
| Key results              | 18  | Summarise key results with reference to study objectives                                                                                                                                                     | 14–<br>18 |
| Limitations              | 19  | Discuss limitations of the study, taking into account sources of potential bias or imprecision. Discuss both direction and magnitude of any potential bias                                                   | 18–<br>19 |
| Interpretation           | 20  | Give a cautious overall interpretation of results considering objectives, limitations, multiplicity of analyses, results from similar studies, and other relevant evidence                                   | 19–<br>20 |
| Generalisability         | 21  | Discuss the generalisability (external validity) of the study results                                                                                                                                        | 18        |
| <b>Other information</b> |     |                                                                                                                                                                                                              |           |
| Funding                  | 22  | Give the source of funding and the role of the funders for the present study and, if applicable, for the original study on which the present article is based                                                | 21        |

\*Give information separately for cases and controls in case-control studies and, if applicable, for exposed and unexposed groups in cohort and cross-sectional studies.

**Note:** An Explanation and Elaboration article discusses each checklist item and gives methodological background and published examples of transparent reporting. The STROBE checklist is best used in conjunction with this article (freely available on the Web sites of PLoS Medicine at <http://www.plosmedicine.org/>, Annals of Internal Medicine at <http://www.annals.org/>, and Epidemiology at <http://www.epidem.com/>). Information on the STROBE Initiative is available at [www.strobe-statement.org](http://www.strobe-statement.org).

# BMJ Open

## Antibiotic prescription among outpatients in a prefecture of Japan, 2012–2013: A retrospective claims database study

|                                 |                                                                                                                                                                                                                                                                                                                                                                                                                                                                                                                                                                                                                                                                                                                                                                                                     |
|---------------------------------|-----------------------------------------------------------------------------------------------------------------------------------------------------------------------------------------------------------------------------------------------------------------------------------------------------------------------------------------------------------------------------------------------------------------------------------------------------------------------------------------------------------------------------------------------------------------------------------------------------------------------------------------------------------------------------------------------------------------------------------------------------------------------------------------------------|
| Journal:                        | <i>BMJ Open</i>                                                                                                                                                                                                                                                                                                                                                                                                                                                                                                                                                                                                                                                                                                                                                                                     |
| Manuscript ID                   | bmjopen-2018-026251.R1                                                                                                                                                                                                                                                                                                                                                                                                                                                                                                                                                                                                                                                                                                                                                                              |
| Article Type:                   | Research                                                                                                                                                                                                                                                                                                                                                                                                                                                                                                                                                                                                                                                                                                                                                                                            |
| Date Submitted by the Author:   | 12-Dec-2018                                                                                                                                                                                                                                                                                                                                                                                                                                                                                                                                                                                                                                                                                                                                                                                         |
| Complete List of Authors:       | Hashimoto, Hideki; Jichi Medical University Hospital, Division of General Internal Medicine<br>Matsui, Hiroki; Jichi Medical University, Data Science Center; School of Public Health, University of Tokyo, Department of Clinical Epidemiology and Health Economics<br>Sasabuchi, Yusuke; Jichi Medical University, Data Science Center<br>Yasunaga, Hideo; Jichi Medical University, Data Science Center; School of Public Health, The University of Tokyo, Department of Clinical Epidemiology and Health Economics<br>Kotani, Kazuhiko; Jichi Medical University, Division of Community and Family Medicine<br>Nagai, Ryozi; Jichi Medical University, President<br>Hatakeyama, Shuji; Jichi Medical University Hospital, Division of General Internal Medicine/Division of Infectious Diseases |
| <b>Primary Subject Heading</b>: | Infectious diseases                                                                                                                                                                                                                                                                                                                                                                                                                                                                                                                                                                                                                                                                                                                                                                                 |
| Secondary Subject Heading:      | Epidemiology, Public health                                                                                                                                                                                                                                                                                                                                                                                                                                                                                                                                                                                                                                                                                                                                                                         |
| Keywords:                       | Epidemiology < INFECTIOUS DISEASES, Public health < INFECTIOUS DISEASES, INFECTIOUS DISEASES                                                                                                                                                                                                                                                                                                                                                                                                                                                                                                                                                                                                                                                                                                        |
|                                 |                                                                                                                                                                                                                                                                                                                                                                                                                                                                                                                                                                                                                                                                                                                                                                                                     |

SCHOLARONE™  
Manuscripts

1  
2  
3  
4  
5  
6  
7 **1 Antibiotic prescription among outpatients in a prefecture of Japan, 2012–2013: A**  
8  
9  
10 **2 retrospective claims database study**

11  
12  
13  
14  
15  
16  
17 4 Hideki Hashimoto<sup>1</sup>, Hiroki Matsui<sup>2,3</sup>, Yusuke Sasabuchi<sup>2</sup>, Hideo Yasunaga<sup>2,3</sup>, Kazuhiko  
18  
19  
20 5 Kotani<sup>4</sup>, Ryozo Nagai<sup>5</sup>, Shuji Hatakeyama<sup>1,6\*</sup>

21  
22  
23  
24  
25  
26  
27 7 <sup>1</sup>Division of General Internal Medicine, Jichi Medical University Hospital, 3311-1  
28  
29  
30 8 Yakushiji, Shimotsuke-shi, Tochigi 329-0498, Japan.

31  
32  
33 9 <sup>2</sup>Data Science Center, Jichi Medical University, 3311-1 Yakushiji, Shimotsuke-shi,  
34  
35  
36  
37 10 Tochigi 329-0498, Japan.

38  
39  
40 11 <sup>3</sup>Department of Clinical Epidemiology and Health Economics, School of Public Health,  
41  
42  
43 12 University of Tokyo, 7-3-1 Hongo, Bunkyo-ku, Tokyo 113-0033, Japan.

44  
45  
46 13 <sup>4</sup>Division of Community and Family Medicine, Jichi Medical University, 3311-1  
47  
48  
49 14 Yakushiji, Shimotsuke-shi, Tochigi 329-0498, Japan.

50  
51  
52  
53 15 <sup>5</sup>President, Jichi Medical University, 3311-1 Yakushiji, Shimotsuke-shi, Tochigi 329-  
54  
55  
56 16 0498, Japan.

1  
2  
3  
4  
5  
6  
7 17 <sup>6</sup>Division of Infectious Diseases, Jichi Medical University Hospital, 3311-1 Yakushiji,

8  
9  
10 18 Shimotsuke-shi, Tochigi 329-0498, Japan.

11  
12  
13 19

14  
15  
16 20 **\*Corresponding author:**

17  
18  
19 21 Shuji Hatakeyama, M.D., Ph.D.

20  
21  
22 22 Division of General Internal Medicine/Division of Infectious Diseases, Jichi Medical

23  
24 23 University Hospital, 3311-1 Yakushiji, Shimotsuke-shi, Tochigi 329-0498, Japan.

25  
26  
27 24 Phone: +81-285-58-7498

28  
29  
30 25 Fax: +81-285-40-5160

31  
32  
33 26 E-mail: shatake-ky@umin.ac.jp

34  
35  
36 27

37  
38  
39 28 **Key words:** antibiotic, antimicrobial stewardship, antimicrobial-resistance, big data,

40  
41  
42 29 inappropriate prescribing

43  
44  
45 30 **Running title:** Antibiotic prescriptions in Japan

46  
47  
48 31 **Word count for the main text:** 3,069 words

49  
50  
51 32

1  
2  
3  
4  
5  
6  
7 **33 Abstract**  
8  
9

10 **34 Objectives:** To investigate oral antibiotic prescribing patterns and identify factors  
11  
12  
13 **35** associated with antibiotic prescriptions, with the aim of guiding future interventions to  
14  
15  
16 **36** reduce inappropriate prescribing.  
17

18  
19  
20 **37 Design:** Retrospective cohort study.  
21

22  
23 **38 Setting:** Database of public health insurance claims in Kumamoto prefecture (Japan).  
24

25  
26 **39 Participants:** Beneficiaries of the national or late elders' health insurance system  
27  
28  
29  
30 between April 2012 and March 2013.  
31

32  
33 **41 Main outcome measures:** Of 7,770,481 outpatient visits, 682,822 had a code for  
34  
35  
36 **42** antibiotics (860 antibiotic prescriptions per 1000 population). Third-generation  
37  
38  
39  
40 **43** cephalosporins (35%), macrolides (32%), and quinolones (21%) were most frequently  
41  
42  
43 **44** prescribed. Acute respiratory tract infections (ARTIs), including viral upper respiratory  
44  
45  
46 **45** infections (URI) (22%), pharyngitis (18%), bronchitis (11%), and sinusitis (10%) were  
47  
48  
49  
50 **46** most frequently diagnosed for antibiotic prescribing, followed by gastrointestinal (9%),  
51  
52  
53 **47** urinary tract (8%), and skin, cutaneous, and mucosal infections (5%). Antibiotic  
54  
55  
56 **48** prescribing rates for viral URI, pharyngitis, bronchitis, sinusitis, and gastrointestinal  
57  
58

1  
2  
3  
4  
5  
6  
7 49 infections were 35%, 54%, 53%, 57%, and 30%, respectively. In multivariable analysis  
8  
9  
10 50 for ARTIs and gastrointestinal infections, patient age (10–19 years especially), patient  
11  
12  
13 51 sex (male), and facility scale (free-standing clinics or small-scale hospital-based clinics)  
14  
15  
16 52 were associated with increased antibiotic prescribing.  
17  
18  
19

20 53 **Conclusions:** Broad-spectrum antibiotics constituted 88% of oral outpatient antibiotic  
21  
22  
23 54 prescriptions. Approximately 70% of antibiotics were prescribed for ARTIs and  
24  
25  
26 55 gastroenteritis with modest benefit from antibiotic treatment. The quality of antibiotic  
27  
28  
29 56 prescribing needs to be improved. Antimicrobial stewardship interventions should target  
30  
31  
32  
33 57 ARTIs and gastroenteritis, as well as young patients and small-scale institutions.  
34  
35  
36  
37  
38  
39  
40  
41  
42  
43  
44  
45  
46  
47  
48  
49  
50  
51  
52  
53  
54  
55  
56  
57  
58  
59  
60

1  
2  
3  
4  
5  
6  
7 **58 Strength and limitations of this study**  
8  
9

- 10 • This is the first Japanese study to describe outpatient antibiotic prescription patterns  
11  
12  
13 60 linked to individual diagnosis data, comprehensively, by use of the public health  
14  
15  
16 61 insurance claims database.  
17  
18  
19  
20 62 • This study included patients older than 65 years of age, who have not typically been  
21  
22  
23 63 included in previous Japanese studies.  
24  
25  
26 64 • The accuracy of the diagnosis has not been validated due to the nature of the  
27  
28  
29  
30 65 administrative claims database.  
31  
32  
33 66 • There are some unmeasured potential confounding factors such as out-of-hours  
34  
35  
36 67 visits and physician specialty.  
37  
38  
39  
40  
41  
42  
43  
44  
45  
46  
47  
48  
49  
50  
51  
52  
53  
54  
55  
56  
57  
58  
59  
60

## 69 Introduction

70 There is a growing concern about antimicrobial-resistant bacterial infections.  
71 Antimicrobial resistance results in increased health care costs, prolonged hospitalization,  
72 and death.<sup>1-3</sup> The World Health Organization launched the global action plan to combat  
73 the antimicrobial-resistant bacteria in 2015<sup>4</sup> and requested Member States to endorse  
74 national action plans within two years. The government of Japan launched a national  
75 action plan in 2016 in response to the request.<sup>5</sup>

76 Since antimicrobial use is one of the important factors in the emergence of antimicrobial  
77 resistance,<sup>6</sup> it is essential to reduce the inappropriate use of antibiotics. In Japan, a  
78 previous sales data-based study revealed that oral antibiotics account for more than 90%  
79 of total antibiotic consumption and that broad-spectrum antibiotics (third-generation  
80 cephalosporins, macrolides, and fluoroquinolones) account for 77% of oral antibiotic  
81 consumption (daily doses defined per 1000 inhabitants per day).<sup>7</sup> The Japanese national  
82 action plan aims to reduce the total antimicrobial use to two-thirds of current use, and the  
83 use of oral cephalosporins, quinolones, and macrolides to one-half, by 2020. To reduce  
84 inappropriate antimicrobial use, it is important to determine the antimicrobial prescribing



1  
2  
3  
4  
5  
6  
7 85 patterns and factors associated with antibiotic prescription. However, such information  
8  
9  
10 86 has been limited in Japan to date. Although a few recent studies<sup>8,9</sup> described the  
11  
12  
13 87 prescription patterns for upper respiratory tract infections and bronchitis, the prescription  
14  
15  
16 88 patterns of infections other than acute respiratory tract infections (ARTIs) have not been  
17  
18  
19  
20 89 clarified. In addition, patients older than 65 years of age have not been commonly  
21  
22  
23 90 included in these studies, because these studies relied on data from an employee-based  
24  
25  
26 91 insurance claims database. With the high rate in aging population in Japan, it is important  
27  
28  
29  
30 92 to describe the prescription patterns in elderly patients.

31  
32  
33 93 In this study, we described outpatient oral antibiotic prescribing patterns for all  
34  
35  
36 94 infections and in all ages, using the Japanese administrative claims database. Furthermore,  
37  
38  
39  
40 95 we aimed to identify factors associated with antibiotic prescriptions for ARTIs and  
41  
42  
43 96 gastrointestinal infections, the targets of the antimicrobial stewardship guideline  
44  
45  
46 97 formulated by the government of Japan in 2017.<sup>10</sup>

1  
2  
3  
4  
5  
6  
7 **99 Methods**  
8  
9

10 *Data sources*  
11  
12

13 101 The current population of Japan is approximately 127 million. All citizens are enrolled  
14  
15  
16 102 in a universal health coverage insurance program provided by the social insurance system  
17  
18  
19 103 (for employees younger than 75 years of age), national health insurance system (for self-  
20  
21  
22  
23 104 employed or unemployed people younger than 75 years of age), and the late elders' health  
24  
25  
26 105 insurance system (for those aged 75 years and older). In Japan, patients can visit any  
27  
28  
29 106 clinic of their choice. All physicians working at any free-standing or hospital-based  
30  
31  
32  
33 107 clinics can provide primary care and prescribe antibiotics.  
34  
35

36 108 We conducted a retrospective analysis using the administrative health insurance claims  
37  
38  
39 109 database of Kumamoto prefecture, situated in the southwestern region of Japan, with a  
40  
41  
42  
43 110 population of about 1.7 million. This database covers approximately 780,000 residents of  
44  
45  
46 111 Kumamoto prefecture (44% of the population) who were beneficiaries of the national  
47  
48  
49 112 health insurance system,<sup>11</sup> or the late elders' health insurance system.<sup>12</sup> The participants  
50  
51  
52  
53 113 in this study may be older than the general population of Japan.  
54  
55

56 114 The database is composed of medical and pharmacy claims. It provides monthly  
57  
58  
59  
60

1  
2  
3  
4  
5  
6  
7 115 information about patient demographics (year and month of birth and sex), diagnoses,  
8  
9  
10 116 date of diagnoses, medical procedures, medications, scale (number of beds) of the  
11  
12  
13 117 medical facility, as well as the identification numbers assigned to each individual, medical  
14  
15  
16 118 facility, and dispensing pharmacy. At the end of each month, claims are registered from  
17  
18  
19 119 each medical facility. The diagnoses were recorded by physicians of each medical facility  
20  
21  
22  
23 120 and coded according to the International Classification of Diseases and Related Health  
24  
25  
26 121 Problems, 10th Revision (ICD-10).  
27  
28  
29  
30 122

31  
32  
33 123 *Data preparation*  
34  
35

36 124 We linked the medical and pharmacy claims on the database using an identification  
37  
38  
39  
40 125 number unique to each patient, medical facility, and dispensing pharmacy. We identified  
41  
42  
43 126 all newly diagnosed outpatients, with any infectious diseases, between April 2012 and  
44  
45  
46 127 March 2013. Infectious diseases diagnoses were categorized according to the indication  
47  
48  
49  
50 128 for antibiotic use (Table S1, available as supplementary data). This categorization was  
51  
52  
53 129 based on the study by Fleming-Dutra KE *et al.*<sup>13</sup> Bronchitis and bronchiolitis were divided  
54  
55  
56 130 into two categories based on whether the patients had chronic obstructive pulmonary  
57  
58  
59  
60

1  
2  
3  
4  
5  
6  
7 131 disease (COPD) as comorbidity or not, because of differing need of treatment with  
8  
9  
10 132 antibiotics. If a patient had multiple infectious diagnoses in one month, a single infectious  
11  
12  
13 133 diagnosis, selected in order from Group 1 (antibiotics are usually indicated) to Group 3  
14  
15  
16 134 (antibiotics are rarely indicated), and the first-listed diagnosis in alphabetical order of  
17  
18  
19  
20 135 ICD-10 codes in the selected group was included in the analyses (Table S1).  
21  
22

23 136 We also identified all outpatients with any antibiotic prescriptions. Topical,  
24  
25  
26 137 intramuscular, and intravenous antibiotics were excluded. Antibiotics were categorized  
27  
28  
29  
30 138 according to the Anatomical Therapeutic Chemical (ATC) classification system  
31  
32  
33 139 (<http://www.whooc.no/atcddd/>) as follows: tetracyclines (J01A), penicillins (J01C), first-  
34  
35  
36 140 and second-generation cephalosporins (J01DB and J01DC), third-generation  
37  
38  
39  
40 141 cephalosporins (J01DD), sulfonamides and trimethoprim (J01E), macrolides (J01FA),  
41  
42  
43 142 quinolones (J01M), and others (J01B, J01DH, J01DI, J01FF, J01G, and J01X). We  
44  
45  
46 143 assumed that third-generation cephalosporins accounted for most of cephalosporins used  
47  
48  
49  
50 144 in Japan; hence, we divided cephalosporins into two groups: first/second- and third-  
51  
52  
53 145 generation cephalosporins. Antibiotics were linked to the infectious diagnoses in each  
54  
55  
56 146 patient's claims when both the code of antibiotics and the code of diagnoses were  
57  
58  
59  
60

1  
2  
3  
4  
5  
6  
7 147 recorded in the same month.  
8  
9

10 148  
11  
12

13 149 *Data Analysis*  
14  
15

16 150 We calculated the frequency of antibiotic prescription for all visits with infections  
17  
18  
19  
20 151 (according to diagnosis and antibiotic class). For ARTIs (including pharyngitis, sinusitis,  
21  
22  
23 152 bronchitis/bronchiolitis, and viral upper respiratory infections [URI]) and gastrointestinal  
24  
25  
26 153 infections, we performed separate multivariable logistic regression analyses to identify  
27  
28  
29  
30 154 the factors associated with antibiotic prescriptions. The variables were as follows: age  
31  
32  
33 155 and sex of patients and scale (number of beds) of the medical facilities. Generalized  
34  
35  
36 156 estimating equations with exchangeable correlation structure were used to account for the  
37  
38  
39  
40 157 clustering of the medical facilities.  $P$ -values  $< 0.05$  were considered statistically  
41  
42  
43 158 significant. All statistical analyses were performed with the statistical package R, v.3.5.0  
44  
45  
46 159 (<http://cran.r-project.org>).  
47  
48  
49

50 160  
51  
52

53 161 *Patient involvement*  
54  
55

56 162 No patients were involved in the development of the research question or the outcome  
57  
58  
59  
60

1  
2  
3  
4  
5  
6  
7 163 measures, nor were they involved in developing plans for design or implementation of  
8  
9  
10 164 the study. No patients were asked for advice regarding the interpretation or writing of  
11  
12  
13 165 results. There are no plans to disseminate the study results to the relevant patient  
14  
15  
16  
17 166 community.

For peer review only

1  
2  
3  
4  
5  
6  
7 **168 Results**  
8  
9

10 169 In total, there were 7,770,481 outpatient visits between April 2012 and March 2013.  
11  
12  
13 170 Antibiotics were prescribed in 682,822 visits (860 antibiotic prescriptions per 1000  
14  
15  
16 171 population). Among these, third-generation cephalosporins were most frequently  
17  
18  
19 172 prescribed (237,372 visits, 35%), followed by macrolides (215,656 visits, 32%) and  
20  
21  
22  
23 173 quinolones (145,135 visits, 21%). This trend was observed regardless of age group (Table  
24  
25  
26 174 1) and scale of the medical facility (Table 2), except for those less than 9 years of age in  
27  
28  
29 175 whom the systemic use of quinolones is not recommended. Information about facility  
30  
31  
32  
33 176 scale was available from 669,086 out of 682,822 visits. Of these, antibiotics were  
34  
35  
36 177 prescribed most frequently at free-standing clinics (530,916 visits, 79%), followed by  
37  
38  
39  
40 178 small-scale (< 200 beds; 78,546 visits, 12%), medium-scale (200–499 beds; 45,271 visits,  
41  
42  
43 179 7%), and large-scale (500 beds or more; 14,353 visits, 2%) hospital-based clinics (Table  
44  
45  
46 180 2).

47  
48  
49 181 We were able to link the individual diagnoses to the antibiotic prescription in 447,232  
50  
51  
52  
53 182 visits (Table 3). Of these patients, approximately 60% of antibiotics were prescribed for  
54  
55  
56 183 ARTIs, including viral URI (96,989 visits, 22%), pharyngitis (78,469 visits, 18%),  
57  
58

1  
2  
3  
4  
5  
6  
7 184 bronchitis without COPD (47,248 visits, 11%), and sinusitis (45,456 visits, 10%). Other  
8  
9  
10 185 than ARTIs, there were frequent antibiotic prescriptions for gastrointestinal infections  
11  
12  
13 186 (41,309 visits, 9%), urinary tract infections (37,674 visits, 8%), and skin, cutaneous, and  
14  
15  
16 187 mucosal infections (23,572 visits, 5%). The antibiotic prescription rates for viral URI,  
17  
18  
19  
20 188 pharyngitis, bronchitis (without underlying COPD), sinusitis, and gastrointestinal  
21  
22  
23 189 infections were 35% (96,989 out of 274,441 visits), 54% (78,469 out of 146,508 visits),  
24  
25  
26 190 53% (47,248 out of 89,479 visits), 57% (45,456 out of 80,078 visits), and 30% (41,309  
27  
28  
29  
30 191 out of 137,661 visits), respectively (Table 3).

31  
32  
33 192 Table 4 shows the results of the logistic regression analysis of antibiotic prescription for  
34  
35  
36 193 ARTIs. Patient sex of male was associated with more antibiotic prescription (adjusted  
37  
38  
39  
40 194 odds ratio [OR], 1.10; 95% confidence interval [CI], 1.08 to 1.11). With patients aged 65  
41  
42  
43 195 years or older as reference, patients aged 10 to 19 years were more likely to be prescribed  
44  
45  
46 196 antibiotics (adjusted OR, 2.75; 95% CI, 2.69 to 2.82), followed by patients aged 20 to 64  
47  
48  
49  
50 197 years (adjusted OR, 1.92; 95% CI, 1.89 to 1.94), and patients younger than 10 years  
51  
52  
53 198 (adjusted OR, 1.48; 95% CI, 1.46 to 1.50). Regarding facility scale, with large-scale (500  
54  
55  
56 199 beds or more) hospital-based clinics as reference, free-standing clinics (adjusted OR,



1  
2  
3  
4  
5  
6  
7 200 4.24; 95% CI, 4.03 to 4.45), small-scale (< 200 beds) hospital-based clinics (adjusted OR,  
8  
9  
10 201 2.07; 95% CI, 1.97 to 2.18), and medium-scale (200–499 beds) hospital-based clinics  
11  
12  
13 202 (adjusted OR, 1.71; 95% CI, 1.62 to 1.80) were significantly associated with more  
14  
15  
16 203 frequent antibiotic prescription.  
17  
18  
19  
20 204 Similar results were shown with the logistic regression analysis for gastrointestinal  
21  
22  
23 205 infections (Table 5). Patient sex of male was associated with slightly more antibiotic  
24  
25  
26 206 prescription (adjusted OR, 1.04; 95% CI, 1.01 to 1.06) than was patient sex of female.  
27  
28  
29  
30 207 Patients aged 10 to 19 years (adjusted OR, 1.92; 95% CI, 1.83 to 2.00), 20 to 64 years  
31  
32  
33 208 (adjusted OR, 1.55; 95% CI, 1.51 to 1.60), and younger than 10 years (adjusted OR, 1.76;  
34  
35  
36 209 95% CI, 1.71 to 1.82) received more antibiotic prescriptions compared with patients aged  
37  
38  
39  
40 210 65 years or older. With reference to large-scale ( $\geq$  500 beds) hospital-based clinics, free-  
41  
42  
43 211 standing clinics (adjusted OR, 1.88; 95% CI, 1.68 to 2.10) and small-scale (< 200 beds)  
44  
45  
46 212 hospital-based clinics (adjusted OR, 1.17; 95% CI, 1.04 to 1.32) were associated with  
47  
48  
49  
50 213 frequent antibiotic prescription for gastrointestinal infections.  
51  
52  
53  
54  
55  
56  
57  
58  
59  
60

1  
2  
3  
4  
5  
6  
7 **215 Discussion**  
8  
9

10 216 We described oral antibiotic prescription patterns in the outpatient care setting in Japan.  
11

12  
13 217 To the best of our knowledge, this is the first Japanese study to comprehensively describe  
14

15  
16 218 antibiotic prescription patterns linked to individual diagnoses data, using the claims  
17

18  
19 219 database. Broad-spectrum antibiotics consisting of third-generation cephalosporins,  
20

21  
22 220 macrolides, and quinolones accounted for nearly 90% of antibiotic prescriptions in the  
23

24  
25 221 primary care settings. Prescription of penicillin was only 5%. This prescription pattern is  
26

27  
28 222 consistent with the results of an analysis of antibiotic sales data in Japan, in which 77%  
29

30  
31 223 of oral antibiotics shipped were broad-spectrum.<sup>7</sup> In contrast, the use of cephalosporins,  
32

33  
34 224 macrolides, and quinolones in the United States of America (USA) and Europe were  
35

36  
37 225 much lower than in Japan. Hicks *et al.*<sup>14</sup> analyzed the sales data of oral antibiotics in the  
38

39  
40 226 USA and showed that cephalosporins, macrolides, and quinolones accounted for 48% of  
41

42  
43 227 the total oral antibiotics. In their study, penicillin had the largest share of the antibiotics  
44

45  
46 228 (23%). Data from the European Surveillance of Antimicrobial Consumption project<sup>15</sup> also  
47

48  
49 229 showed that cephalosporins, macrolides, and quinolones accounted for about one third of  
50

51  
52 230 the total oral antibiotic consumptions, in Europe. This study demonstrated a rather high  
53  
54  
55  
56  
57  
58

1  
2  
3  
4  
5  
6  
7 231 ratio of broad-spectrum to narrow-spectrum oral antibiotics, in Japan; therefore, the  
8  
9  
10 232 quality of antibiotic prescribing needs to be improved.  
11  
12

13 233 Although quinolones are not recommended for children, quinolones were prescribed as  
14  
15  
16 234 much as penicillins in children aged 0–9 years in our study. This may be because oral  
17  
18  
19  
20 235 fluoroquinolones such as tosufloxacin are approved for children to treat otitis media and  
21  
22  
23 236 pneumonia in Japan. Since the approval of quinolones in 2010, despite the  
24  
25  
26  
27 237 recommendation to prescribe quinolones carefully for children, many physicians  
28  
29  
30 238 prescribed tosufloxacin to children in expectation of clinical effectiveness.  
31  
32

33 239 Among antibiotics linked with individual diagnosis data, over 60% of antibiotics were  
34  
35  
36 240 prescribed for ARTIs, followed by gastrointestinal infections (9%), urinary tract  
37  
38  
39  
40 241 infections (8%), and skin, cutaneous, and mucosal infections (5%). Surprisingly, viral  
41  
42  
43 242 URI (common cold) was the most frequent infection associated with antibiotic  
44  
45  
46  
47 243 prescription. In the ambulatory care setting in the USA, antibiotics were prescribed most  
48  
49  
50 244 frequently for acute respiratory conditions (41–44%), followed by skin and mucosal  
51  
52  
53 245 conditions (15–19%), urinary tract infections (7–8%), and gastrointestinal conditions (5–  
54  
55  
56 246 6%).<sup>13,16</sup> Another study using primary care data in the United Kingdom (UK)<sup>17</sup>  
57  
58  
59  
60

1  
2  
3  
4  
5  
6  
7 247 demonstrated that 46% of antibiotics were prescribed for respiratory tract conditions,  
8  
9  
10 248 followed by urogenital tract (23%), and skin conditions (10%). Only 1% was prescribed  
11  
12  
13 249 for gastrointestinal conditions. Our study demonstrated a higher proportion of antibiotic  
14  
15  
16 250 prescription for ARTIs (approximately 15% higher than those in USA or UK) and  
17  
18  
19  
20 251 gastrointestinal infections (approximately 5% higher) in Japan.

23 252 Antibiotics were prescribed for 35% of viral URI cases and approximately 50–60% of  
24  
25  
26 253 pharyngitis, bronchitis, and sinusitis cases in our study. These prescription rates were  
27  
28  
29  
30 254 approximately similar to those of a USA study,<sup>13</sup> which showed a rate of 30% for viral  
31  
32  
33 255 URI, 62% for pharyngitis, 65% for bronchitis, and 72% for sinusitis. Medically,  
34  
35  
36 256 antibiotics are rarely indicated for ARTIs.<sup>18</sup> Antibiotics have no role in the treatment of  
37  
38  
39  
40 257 either viral URI (common cold) or the majority of acute bronchitis cases, which are  
41  
42  
43 258 generally caused by viral infection. Only a minority of patients with bronchitis (< 10%),  
44  
45  
46 259 for example patients who have underlying COPD or whooping cough, may derive any  
47  
48  
49  
50 260 benefit from antibiotic treatment. With pharyngitis, antibiotics are mainly indicated only  
51  
52  
53 261 for streptococcal pharyngitis, which accounts for 5–15% of pharyngitis in adults and 20–  
54  
55  
56 262 30% in children.<sup>19,20</sup>

1  
2  
3  
4  
5  
6  
7 263 The antibiotic prescription rate for gastrointestinal infections was three times higher than  
8  
9  
10 264 the rate reported in the USA (30% vs. 10%).<sup>13</sup> As most acute gastroenteritis is self-  
11  
12  
13 265 limiting, the Japanese national guideline recommends the non-usage of antibiotics for  
14  
15  
16 266 gastroenteritis unless symptoms are severe.<sup>10</sup> Based on our study, approximately 70% of  
17  
18  
19  
20 267 oral antibiotics are prescribed for ARTIs or acute gastroenteritis; however, most (> 80%),  
21  
22  
23 268 did not require antibiotics. Therefore, there is a need for suitable targets to reduce  
24  
25  
26 269 unnecessary antibiotic use in accordance with antimicrobial stewardship program.  
27  
28  
29  
30 270 Previous studies from the UK<sup>21, 22</sup> analyzed reasons for antibiotic prescribing for sore  
31  
32  
33 271 throats and assessed that patient demand for antibiotics and physician pressure to meet  
34  
35  
36 272 patient demand are associated with antibiotic prescription. In addition, we suppose that  
37  
38  
39  
40 273 physicians frequently prescribe antibiotics for URI as prophylaxis for complicating  
41  
42  
43 274 secondary bacterial infections.

44  
45  
46 275 As for antibiotic prescription for ARTIs and gastrointestinal infections, most  
47  
48  
49  
50 276 antibiotics prescribed were broad-spectrum. For example, quinolones accounted for 15–  
51  
52  
53 277 35% of the antibiotics prescribed for ARTIs in this study, although the proportion of  
54  
55  
56 278 quinolones to whole antibiotics prescribed for ARTIs should be <5% according to the

1  
2  
3  
4  
5  
6  
7 279 ESAC disease-specific quality indicators<sup>23</sup>. Accordingly, the quality of antibiotic  
8  
9  
10 280 prescribing should be improved.

11  
12  
13 281 The logistic regression analyses revealed several factors associated with antibiotic  
14  
15  
16 282 prescriptions for ARTIs and gastrointestinal infections. The smaller the facility scale, the  
17  
18  
19 283 higher the odds of antibiotic prescribing. Recent studies from Japan<sup>8</sup> and Taiwan<sup>24</sup> have  
20  
21  
22  
23 284 found similar results. As family practitioners, pediatricians, and internists usually  
24  
25  
26 285 prescribe a high number of antibiotic courses,<sup>14</sup> greater adherence to treatment guidelines  
27  
28  
29 286 among physicians in these specialties is particularly important. It has also been reported  
30  
31  
32  
33 287 that mid- or late-career stage physicians (because the effect of training received during  
34  
35  
36 288 medical education might have reduced, after this long time) were more likely to prescribe  
37  
38  
39 289 antibiotics for nonbacterial acute URI.<sup>25</sup>

40  
41  
42  
43 290 Patient age was another factor associated with antibiotic prescription. In this study,  
44  
45  
46 291 antibiotic prescription rates for ARTIs and gastrointestinal infections were highest in  
47  
48  
49 292 patients aged 10–19 years, followed by patients aged 20–64 years (ARTIs) or 0–9 years  
50  
51  
52  
53 293 (gastrointestinal infections). A previous study concerning Dutch primary care showed  
54  
55  
56 294 similar results of antibiotic over-prescribing for ARTIs in patients aged 31–65 years (i.e.,  
57  
58

1  
2  
3  
4  
5  
6  
7 295 not in children or the elderly).<sup>26</sup> As adolescents and young adults generally pose a much  
8  
9  
10 296 lower risk of disease complications than young children or elderly individuals,  
11  
12  
13 297 antimicrobial stewardship should focus on these age groups of patients. In this study,  
14  
15  
16 298 patient sex of male was also associated with increased antibiotic prescribing. Although a  
17  
18  
19  
20 299 patient sex difference was observed in another study, the results differed; female patients  
21  
22  
23 300 were more likely to have high prescribing in the USA.<sup>14</sup> The reason for patient age and  
24  
25  
26 301 sex difference in antibiotic prescribing remains to be clarified. Patient sex and age-  
27  
28  
29  
30 302 standardized antibiotic prescription rates need to be assessed in Japan for effective  
31  
32  
33 303 intervention.

34  
35  
36 304 Our study has several limitations. First, our results do not represent the entire antibiotic  
37  
38  
39  
40 305 prescription pattern in Japan because the claims database used in this study was composed  
41  
42  
43 306 of claims in only one prefecture. Geographical diversity in antibiotic prescribing may be  
44  
45  
46 307 present, as observed in the previous study from the USA.<sup>14</sup> Second, since we used an  
47  
48  
49  
50 308 administrative claims database; the accuracy of the diagnosis was not validated. In  
51  
52  
53 309 addition, we could not link diagnosis and antibiotic prescriptions on a one-to-one level  
54  
55  
56 310 when patients had multiple infectious diagnoses. Third, there may be other potential

1  
2  
3  
4  
5  
6  
7 311 confounding factors that were not included in this study. For example, information on  
8  
9  
10 312 out-of-hours visits,<sup>8</sup> non-specialty physicians,<sup>8, 24, 27</sup> and patient's low-per capita income  
11  
12  
13 313 or low-education,<sup>14</sup> which have been reported as potential factors associated with  
14  
15  
16 314 inappropriate antibiotics prescribing, could not be extracted from the claims database in  
17  
18  
19  
20 315 this study. Fourth, only 65% of antibiotic prescriptions were linked to infectious disease  
21  
22  
23 316 visits. This may be partly because we could not capture the information concerning  
24  
25  
26 317 follow-up visits when patients had multiple visits for a single infection (antibiotics were  
27  
28  
29  
30 318 linked to the infectious diagnoses only when they were prescribed at the first visit of an  
31  
32  
33 319 illness episode). In addition, approximately 3–5% of medical claims that included  
34  
35  
36 320 diagnostic codes and 0.1% of pharmacy claims that included prescription (medication)  
37  
38  
39  
40 321 codes were registered in non-digital format. As non-digital insurance claims were not  
41  
42  
43 322 included in our database, 3–5% of antibiotic prescriptions were not linked to diagnoses.  
44  
45  
46 323 Therefore, inappropriate antibiotic prescription might be underestimated rather than  
47  
48  
49  
50 324 overestimated.

51  
52  
53 325 In conclusion, this Japanese study demonstrated that third-generation cephalosporins,  
54  
55  
56 326 macrolides, and quinolones accounted for 88% of oral antibiotic prescription.  
57  
58



1  
2  
3  
4  
5  
6  
7 327 Approximately 60% of antibiotic prescription was provided for ARTIs, with viral URI  
8  
9  
10 328 and pharyngitis being the two ARTI diagnoses with the largest antibiotic prescriptions.  
11  
12  
13 329 Gastrointestinal infections were the second most common diagnosis for antibiotic  
14  
15  
16 330 prescribing. The scale of the facilities (clinic or small-scale hospital) and patient age  
17  
18  
19 331 (adolescents and young adults) were factors associated with antibiotic over-prescription.  
20  
21  
22  
23 332 Antimicrobial stewardship interventions should focus on targeting antibiotic prescribing  
24  
25  
26 333 for these infectious diagnoses, patients, and institutions. Further nationwide studies are  
27  
28  
29 334 needed to support our data, and longitudinal studies using medical claims data are needed  
30  
31  
32  
33 335 to evaluate the effectiveness of antimicrobial stewardship.  
34  
35  
36  
37  
38  
39  
40  
41  
42  
43  
44  
45  
46  
47  
48  
49  
50  
51  
52  
53  
54  
55  
56  
57  
58  
59  
60

1  
2  
3  
4  
5  
6  
7 **336 Authors' contributions**  
8

9  
10 337 HH and SH conceived the study, interpreted the data and results, and drafted the  
11  
12  
13 338 manuscript. HH, HM, YS, and HY collected, organized, analyzed the data, and  
14  
15  
16 339 performed statistical analyses. KK and RN conceived the study and collected and  
17  
18  
19 340 interpreted the data. All authors critically revised the manuscript for intellectual content.  
20  
21  
22  
23 341 All authors read and approved the final manuscript.  
24  
25

26 342

27  
28  
29  
30 **343 Funding**  
31

32  
33 344 This work was funded by ImPACT Program of Council for Science, Technology, and  
34  
35  
36 345 Innovation (Cabinet Office, Government of Japan) and by MEXT KAKENHI, Grant  
37  
38  
39  
40 346 Number 16K09254.  
41

42  
43 347  
44  
45

46 **348 Competing interests**  
47

48  
49 349 None declared.  
50

51  
52  
53 350  
54

55  
56 **351 Data sharing**  
57  
58

1  
2  
3  
4  
5  
6  
7 352 No additional data available.  
8  
9

10 353  
11  
12

13 354 **Transparency declarations**  
14  
15

16 355 The lead author (the manuscript's guarantor) affirms that the manuscript is an honest,  
17  
18  
19  
20 356 accurate, and transparent account of the study reported; that no important aspects of the  
21  
22  
23 357 study have been omitted; and that any discrepancies from the study as planned have been  
24  
25  
26 358 explained.  
27  
28

29  
30 359  
31  
32

33 360 **Ethical approval**  
34  
35

36 361 This study was approved by the Ethics Committee of the Jichi Medical University  
37  
38  
39  
40 362 (Number 17-002).  
41  
42  
43  
44  
45  
46  
47  
48  
49  
50  
51  
52  
53  
54  
55  
56  
57  
58  
59  
60

363 **Table 1.** Frequency of oral antibiotic prescriptions by age and antibiotic groups

364

| Antibiotic groups<br>coded by ATC* classification** | Number (%) of visits with antibiotic prescription |               |               |                |                |
|-----------------------------------------------------|---------------------------------------------------|---------------|---------------|----------------|----------------|
|                                                     | Age Group, y                                      |               |               |                |                |
|                                                     | 0–9                                               | 10–19         | 20–64         | ≥ 65           | All ages       |
| Penicillins                                         | 7,495 (7.2)                                       | 1,724 (4.2)   | 8,574 (4.5)   | 14,924 (4.3)   | 32,717 (4.8)   |
| First/second-generation cephalosporins              | 964 (0.9)                                         | 411 (1.0)     | 2,987 (1.6)   | 5,719 (1.6)    | 10,081 (1.5)   |
| Third-generation cephalosporins                     | 52,082 (49.9)                                     | 16,367 (40.1) | 60,621 (31.8) | 108,302 (31.2) | 237,372 (34.8) |
| Macrolides                                          | 28,597 (27.4)                                     | 14,691 (36.0) | 56,719 (29.7) | 115,649 (33.3) | 215,656 (31.6) |
| Quinolones                                          | 7,286 (7.0)                                       | 4,158 (10.2)  | 48,843 (25.6) | 84,848 (24.4)  | 145,135 (21.3) |
| Sulfonamides and trimethoprim                       | 32 (0.0)                                          | 53 (0.1)      | 1,389 (0.7)   | 4,520 (1.3)    | 5,994 (0.9)    |
| Tetracyclines                                       | 915 (0.9)                                         | 1,366 (3.3)   | 4,366 (2.3)   | 5,147 (1.5)    | 11,794 (1.7)   |
| Other antibiotics                                   | 6,901 (6.6)                                       | 2,021 (5.0)   | 7,186 (3.8)   | 7,965 (2.3)    | 24,073 (3.5)   |
| All antibiotics                                     | 104,272                                           | 40,791        | 190,685       | 347,074        | 682,822        |

365 \*ATC: Anatomical Therapeutic Chemical

366 \*\*Penicillins, J01C; First-generation cephalosporins, J01DB; Second-generation cephalosporins, J01DC; Third-generation cephalosporins, J01DD;

367 Macrolides, J01FA; Quinolones, J01M; Sulfonamides and trimethoprim, J01E; Tetracyclines, J01A; Other antibiotics, J01B, J01DH, J01DI, J01FF,

368 J01G, and J01X

369 **Table 2.** Frequency of oral antibiotic prescriptions by facility scale and antibiotic group\*

370

| Antibiotic groups<br>coded by ATC** classification*** | Number (%) of visits with antibiotic prescription |                                                         |                                                            |                                                            | All facilities |
|-------------------------------------------------------|---------------------------------------------------|---------------------------------------------------------|------------------------------------------------------------|------------------------------------------------------------|----------------|
|                                                       | Free-standing clinic                              | Small-scale hospital<br>( $< 200$ beds)-based<br>clinic | Medium-scale<br>hospital (200–499<br>beds)-based<br>clinic | Large-scale hospital<br>( $\geq 500$ beds)-based<br>clinic |                |
| Penicillins                                           | 25,225 (4.8)                                      | 3,453 (4.4)                                             | 2,968 (6.6)                                                | 565 (3.9)                                                  | 32,211 (4.8)   |
| First/second-generation cephalosporins                | 6,755 (1.3)                                       | 1,789 (2.3)                                             | 1,245 (2.8)                                                | 158 (1.1)                                                  | 9947 (1.5)     |
| Third-generation cephalosporins                       | 187,928 (35.4)                                    | 25,463 (32.4)                                           | 15,252 (33.7)                                              | 4,139 (28.8)                                               | 232,782 (34.8) |
| Macrolides                                            | 169,980 (32.0)                                    | 26,307 (33.5)                                           | 11,319 (25.0)                                              | 3,833 (26.7)                                               | 211,439 (31.6) |
| Quinolones                                            | 110,770 (20.9)                                    | 17,877 (22.8)                                           | 9,992 (22.1)                                               | 3,402 (23.7)                                               | 142,041 (21.2) |
| Sulfonamides and trimethoprim                         | 712 (0.1)                                         | 1,069 (1.4)                                             | 2,234 (4.9)                                                | 1,618 (11.3)                                               | 5,633 (0.8)    |
| Tetracyclines                                         | 9,477 (1.8)                                       | 846 (1.1)                                               | 803 (1.8)                                                  | 320 (2.2)                                                  | 11,446 (1.7)   |
| Other antibiotics                                     | 20,069 (3.8)                                      | 1,742 (2.2)                                             | 1,458 (3.2)                                                | 318 (2.2)                                                  | 23,587 (3.5)   |
| All antibiotics                                       | 530,916                                           | 78,546                                                  | 45,271                                                     | 14,353                                                     | 669,086        |

371 \*13,736 patients with antibiotic prescription were excluded due to missing data about facility scale.

372 \*\*ATC: Anatomical Therapeutic Chemical

373 \*\*\*Penicillins, J01C; First-generation cephalosporins, J01DB; Second-generation cephalosporins, J01DC; Third-generation cephalosporins, J01DD;

374 Macrolides, J01FA; Quinolones, J01M; Sulfonamides and trimethoprim, J01E; Tetracyclines, J01A; Other antibiotics, J01B, J01DH, J01DI, J01FF,

375 J01G, and J01X

376 **Table 3.** Frequency of oral antibiotic prescriptions by antibiotic groups and diagnoses

377

| Diagnoses                          | All visits | Visits with any antibiotic prescription and prescription rate (%) | Number (%) of visits with antibiotic prescriptions by antibiotic groups* |                                         |                        |              |               |           |                |                   |
|------------------------------------|------------|-------------------------------------------------------------------|--------------------------------------------------------------------------|-----------------------------------------|------------------------|--------------|---------------|-----------|----------------|-------------------|
|                                    |            |                                                                   | Penicillins                                                              | 1 <sup>st</sup> /2 <sup>nd</sup> cephem | 3 <sup>rd</sup> cephem | Macrolide s  | Quinolone s   | ST        | Tetracyclin es | Other antibiotics |
| Miscellaneous bacterial infections | 45,061     | 20,429 (45.3)                                                     | 2,969 (11.5)                                                             | 468 (1.8)                               | 7,404 (28.7)           | 7,868 (30.5) | 5,731 (22.2)  | 181 (0.7) | 444 (1.7)      | 728 (2.8)         |
| STD                                | 14,051     | 3,931 (28.0)                                                      | 86 (1.9)                                                                 | 76 (1.7)                                | 836 (18.9)             | 1515 (34.2)  | 496 (11.2)    | 14 (0.3)  | 147 (3.3)      | 1,260 (28.4)      |
| Bacterial Pneumonia                | 47,035     | 21,473 (45.7)                                                     | 916 (3.4)                                                                | 121 (0.5)                               | 5,044 (18.9)           | 8,568 (32.2) | 11,236 (42.2) | 191 (0.7) | 238 (0.9)      | 316 (1.2)         |
| Abdominal infection                | 9,208      | 2,077 (22.6)                                                      | 69 (3.2)                                                                 | 29 (1.3)                                | 680 (31.1)             | 142 (6.5)    | 1,086 (49.7)  | ≤ 10      | ≤ 10           | 177 (8.1)         |
| Orthopedic infection               | 1,749      | 380 (21.7)                                                        | 36 (8.2)                                                                 | 22 (5.0)                                | 225 (51.4)             | 21 (4.8)     | 93 (21.2)     | ≤ 10      | 19 (4.3)       | 22 (5.0)          |
| Urinary tract infections           | 97,948     | 37,674 (38.5)                                                     | 1,195 (2.9)                                                              | 567 (1.4)                               | 14,735 (36.0)          | 1,998 (4.9)  | 20,229 (49.5) | 429 (1.0) | 521 (1.3)      | 1,232 (3.0)       |
| PID                                | 11,621     | 1,763 (15.2)                                                      | 84 (4.6)                                                                 | 26 (1.4)                                | 1127 (61.4)            | 164 (8.9)    | 167 (9.1)     | ≤ 10      | ≤ 10           | 273 (14.8)        |

28

|                             |         |               |              |             |               |               |               |           |              |              |  |
|-----------------------------|---------|---------------|--------------|-------------|---------------|---------------|---------------|-----------|--------------|--------------|--|
|                             |         |               |              |             |               | 2)            |               |           |              |              |  |
| GI infections               | 137,661 | 41,309 (30.0) | 2,121 (4.6)  | 264 (0.6)   | 12,060 (26.0) | 8603 (18.6)   | 13206 (28.5)  | 196 (0.4) | 232 (0.5)    | 9,680 (20.9) |  |
| Skin infections             | 62,202  | 23,572 (37.9) | 1,167 (4.6)  | 1,337 (5.3) | 15,311 (60.6) | 1,975 (7.8)   | 2,848 (11.3)  | 25 (0.1)  | 997 (3.9)    | 1,615 (6.4)  |  |
| Suppurative otitis media    | 16,059  | 9,958 (62.0)  | 1,566 (11.8) | 18 (0.1)    | 5,213 (39.1)  | 1,972 (14.8)  | 3,654 (27.4)  | ≤ 10      | 92 (0.7)     | 812 (6.1)    |  |
| Pharyngitis                 | 146,508 | 78,469 (53.6) | 4,372 (5.1)  | 450 (0.5)   | 35,958 (41.8) | 27,454 (31.9) | 16,387 (19.1) | 121 (0.1) | 301 (0.3)    | 976 (1.1)    |  |
| Sinusitis                   | 80,078  | 45,456 (56.8) | 3,654 (6.9)  | 481 (0.9)   | 15,282 (28.8) | 20,677 (39.0) | 11,441 (21.6) | ≤ 10      | 779 (1.5)    | 766 (1.4)    |  |
| Bronchitis with COPD        | 6,832   | 4,313 (63.1)  | 208 (4.1)    | 14 (0.3)    | 912 (17.8)    | 2,178 (42.5)  | 1,762 (34.3)  | 28 (0.5)  | 11 (0.2)     | 17 (0.3)     |  |
| Acne                        | 6,939   | 2,030 (29.3)  | ≤ 10         | 32 (1.5)    | 174 (8.3)     | 739 (35.2)    | 41 (2.0)      | ≤ 10      | 1,050 (50.0) | 62 (3.0)     |  |
| Nonbacterial GI infections  | 1,215   | 116 (9.5)     | ≤ 10         | ≤ 10        | 42 (33.1)     | 38 (29.9)     | 33 (26.0)     | ≤ 10      | ≤ 10         | 14 (11.0)    |  |
| Nonsuppurative otitis media | 2,807   | 888 (31.6)    | 63 (5.8)     | ≤ 10        | 384 (35.5)    | 481 (44.5)    | 128 (11.8)    | ≤ 10      | ≤ 10         | 26 (2.4)     |  |
| Viral URI                   | 274,441 | 96,989 (35.3) | 4,839 (4.6)  | 825 (0.8)   | 44,475 (44.4) | 37,001 (37.0) | 16,941 (16.4) | 160 (0.2) | 790 (0.7)    | 601 (0.6)    |  |

|                         |        |               |             |           |               |               |               |          |           |           |
|-------------------------|--------|---------------|-------------|-----------|---------------|---------------|---------------|----------|-----------|-----------|
|                         |        |               |             |           | 2.1)          | 5.0)          | 6.0)          |          |           |           |
| Influenza               | 22,868 | 8,665 (37.9)  | 296 (3.1)   | 74 (0.8)  | 3,030 (31.9)  | 3,934 (41.5)  | 2,040 (21.5)  | ≤ 10     | 47 (0.5)  | 69 (0.7)  |
| Viral pneumonia         | 15     | ≤ 10          | ≤ 10        | ≤ 10      | ≤ 10          | ≤ 10          | ≤ 10          | ≤ 10     | ≤ 10      | ≤ 10      |
| Bronchitis without COPD | 89,479 | 47,248 (52.8) | 1,509 (3.0) | 332 (0.7) | 14,521 (28.5) | 22,779 (44.8) | 11,078 (21.8) | 58 (0.1) | 250 (0.5) | 346 (0.7) |
| Noninfectious diarrhea  | 1,597  | 50 (3.1)      | ≤ 10        | ≤ 10      | ≤ 10          | 19 (55.9)     | 15 (44.1)     | ≤ 10     | ≤ 10      | ≤ 10      |
| Fever                   | 2,908  | 438 (15.1)    | 20 (4.3)    | ≤ 10      | 190 (40.5)    | 103 (22.0)    | 156 (33.3)    | ≤ 10     | ≤ 10      | ≤ 10      |

378 1<sup>st</sup>/2<sup>nd</sup> cephem, first/second-generation cephalosporins; 3<sup>rd</sup> cephem, third-generation cephalosporins; ST, Sulfonamides and trimethoprim; STD,  
 379 sexual transmitted diseases; PID, pelvic inflammatory diseases; GI infections, gastrointestinal infections; Skin infections, Skin, cutaneous and  
 380 mucosal infections; COPD, chronic obstructive pulmonary disease; URI, upper respiratory infections

381 \*Antibiotics were coded according to Anatomical Therapeutic Chemical (ATC) codes: Penicillins, J01C; First-generation cephalosporins, J01DB;  
 382 Second-generation cephalosporins, J01DC; Third-generation cephalosporins, J01DD; Macrolides, J01FA; Quinolones, J01M; Sulfonamides and  
 383 trimethoprim, J01E; Tetracyclines, J01A; Other antibiotics, J01B, J01DH, J01DI, J01FF, J01G, and J01X



384

385 **Table 4.** Factors associated with antibiotic prescription for acute upper respiratory infections\*

386

| Characteristics                      | Antibiotic prescription, n (%) | Unadjusted odds ratio (95% CI) | Adjusted odds ratio (95% CI) |
|--------------------------------------|--------------------------------|--------------------------------|------------------------------|
| <b>Patient age</b>                   |                                |                                |                              |
| 0–9                                  | 44,413 (50.4)                  | 1.66 (1.64 to 1.69)            | 1.48 (1.46 to 1.50)          |
| 10–19                                | 20,822 (65.1)                  | 3.08 (3.00 to 3.15)            | 2.75 (2.69 to 2.82)          |
| 20–64                                | 85,952 (54.6)                  | 1.98 (1.95 to 2.00)            | 1.92 (1.89 to 1.94)          |
| ≥ 65                                 | 121,289 (37.9)                 | 1                              | 1                            |
| <b>Patient sex</b>                   |                                |                                |                              |
| Male                                 | 112,643 (47.4)                 | 1.13 (1.12 to 1.14)            | 1.10 (1.08 to 1.11)          |
| Female                               | 155,038 (44.4)                 | 1                              | 1                            |
| <b>Facility scale</b>                |                                |                                |                              |
| Free-standing clinic                 | 233,078 (49.8)                 | 4.48 (4.27 to 4.70)            | 4.24 (4.03 to 4.45)          |
| Hospital (< 200 beds)-based clinic   | 23,012 (30.8)                  | 2.01 (1.91 to 2.11)            | 2.07 (1.97 to 2.18)          |
| Hospital (200–499 beds)-based clinic | 9,327 (28.2)                   | 1.77 (1.68 to 1.89)            | 1.71 (1.62 to 1.80)          |
| Hospital (≥ 500 beds)-based clinic   | 2,064 (18.2)                   | 1                              | 1                            |

387 CI, confidence interval

388 \*Acute upper respiratory infections include viral upper respiratory infections, pharyngitis, bronchitis, and sinusitis.

389 **Table 5.** Factors associated with antibiotic prescription for gastrointestinal infections

390

| Characteristics                      | Antibiotic prescription, n (%) | Unadjusted odds ratio (95% CI) | Adjusted odds ratio (95% CI) |
|--------------------------------------|--------------------------------|--------------------------------|------------------------------|
| <b>Patient age</b>                   |                                |                                |                              |
| 0–9                                  | 10,809 (37.0)                  | 1.92 (1.86 to 1.98)            | 1.76 (1.71 to 1.82)          |
| 10–19                                | 4,395 (38.7)                   | 2.07 (1.98 to 2.16)            | 1.92 (1.83 to 2.00)          |
| 20–64                                | 12,310 (32.4)                  | 1.57 (1.53 to 1.61)            | 1.55 (1.51 to 1.60)          |
| ≥ 65                                 | 13,795 (23.4)                  | 1                              | 1                            |
| <b>Patient sex</b>                   |                                |                                |                              |
| Male                                 | 18,547 (30.9)                  | 1.09 (1.06 to 1.12)            | 1.04 (1.01 to 1.06)          |
| Female                               | 21,831 (29.1)                  | 1                              | 1                            |
| <b>Facility type</b>                 |                                |                                |                              |
| Free-standing clinic                 | 33,712 (32.9)                  | 2.03 (1.82 to 2.27)            | 1.88 (1.68 to 2.10)          |
| Hospital (< 200 beds)-based clinic   | 4,056 (21.7)                   | 1.15 (1.02 to 1.29)            | 1.17 (1.04 to 1.32)          |
| Hospital (200–499 beds)-based clinic | 2,214 (18.9)                   | 0.97 (0.86 to 1.09)            | 0.93 (0.82 to 1.05)          |
| Hospital (≥ 500 beds)-based clinic   | 396 (19.4)                     | 1                              | 1                            |

391 CI, confidence interval

1  
2  
3  
4  
5  
6  
7 **392 References**  
8  
9

- 10 393 1. de Kraker ME, Wolkewitz M, Davey PG et al. Clinical impact of antimicrobial  
11  
12  
13 394 resistance in European hospitals: excess mortality and length of hospital stay related to  
14  
15  
16 395 methicillin-resistant *Staphylococcus aureus* bloodstream infections. *Antimicrob Agents*  
17  
18  
19  
20 396 *Chemother* 2011; 55: 1598-605.  
21  
22  
23 397 2. Stewardson AJ, Allignol A, Beyersmann J et al. The health and economic burden of  
24  
25  
26 398 bloodstream infections caused by antimicrobial-susceptible and non-susceptible  
27  
28  
29  
30 399 Enterobacteriaceae and *Staphylococcus aureus* in European hospitals, 2010 and 2011: a  
31  
32  
33 400 multicentre retrospective cohort study. *Euro Surveill* 2016; 21: pii=30319.  
34  
35  
36 401 3. Ammerlaan HS, Harbarth S, Buiting AG et al. Secular trends in nosocomial  
37  
38  
39  
40 402 bloodstream infections: antibiotic-resistant bacteria increase the total burden of infection.  
41  
42  
43 403 *Clin Infect Dis* 2013; 56: 798-805.  
44  
45  
46 404 4. World Health Organization. Global action plan on antimicrobial resistance. Available  
47  
48  
49  
50 405 at: [http://apps.who.int/iris/bitstream/10665/193736/1/9789241509763\\_eng.pdf?ua=1](http://apps.who.int/iris/bitstream/10665/193736/1/9789241509763_eng.pdf?ua=1)  
51  
52  
53 406 (Accessed: August 3, 2018).  
54  
55  
56 407 5. The Government of Japan. National Action Plan on Antimicrobial Resistance (AMR)  
57  
58  
59  
60

- 1  
2  
3  
4  
5  
6  
7 408 2016-2020. Available at: <https://www.mhlw.go.jp/file/06-Seisakujouhou-10900000->  
8  
9  
10 409 Kenkoukyoku/0000138942.pdf. (Accessed: August 3, 2018).  
11  
12  
13 410 6. Tacconelli E. Antimicrobial use: risk driver of multidrug resistant microorganisms in  
14  
15  
16 411 healthcare settings. *Curr Opin Infect Dis* 2009; 22: 352-8.  
17  
18  
19  
20 412 7. Muraki Y, Yagi T, Tsuji Y et al. Japanese antimicrobial consumption surveillance:  
21  
22  
23 413 First report on oral and parenteral antimicrobial consumption in Japan (2009-2013). *J*  
24  
25  
26 414 *Glob Antimicrob Resist* 2016; 7: 19-23.  
27  
28  
29  
30 415 8. Yoshida S, Takeuchi M, Kawakami K. Prescription of antibiotics to pre-school  
31  
32  
33 416 children from 2005 to 2014 in Japan: a retrospective claims database study. *J Public*  
34  
35  
36 417 *Health (Oxf)* 2018; 40: 397-403.  
37  
38  
39  
40 418 9. Higashi T, Fukuhara S. Antibiotic prescriptions for upper respiratory tract infection in  
41  
42  
43 419 Japan. *Intern Med* 2009; 48: 1369-75.  
44  
45  
46 420 10. The Government of Japan, Ministry of Health, Labour and Welfare. Manual  
47  
48  
49 421 of Antimicrobial Stewardship (1st Edition). Available at: <http://www.mhlw.go.jp/fil>  
50  
51  
52 422 [e/06-Seisakujouhou-10900000-Kenkoukyoku/0000193504.pdf](http://www.mhlw.go.jp/file/06-Seisakujouhou-10900000-Kenkoukyoku/0000193504.pdf). (Accessed: August 3,  
53  
54  
55 423 2018).  
56  
57  
58  
59  
60

- 1  
2  
3  
4  
5  
6  
7 424 11. Kumamoto prefectural government. 2012 Kumamoto National Health Insuranc  
8  
9  
10 425 e business situation report. Available at: <http://www.pref.kumamoto.jp.e.qp.hp.trans>  
11  
12  
13 426 er.com/kiji\_2735.html (Accessed: August 3, 2018).
- 14  
15  
16 427 12. Kumamoto prefectural government. The situation such as Kumamoto elderly  
17  
18  
19 428 aged 75 or over medical expenses. Available at: <http://www.pref.kumamoto.jp.e.qp.h>  
20  
21  
22 429 p.transer.com/kiji\_13777.html (Accessed: August 3, 2018).
- 23  
24  
25  
26 430 13. Fleming-Dutra KE, Hersh AL, Shapiro DJ et al. Prevalence of Inappropriate  
27  
28  
29 431 Antibiotic Prescriptions Among US Ambulatory Care Visits, 2010-2011. JAMA 2016;  
30  
31  
32 432 315: 1864-73.
- 33  
34  
35  
36 433 14. Hicks LA, Bartoces MG, Roberts RM et al. US outpatient antibiotic prescribing  
37  
38  
39 434 variation according to geography, patient population, and provider specialty in 2011. Clin  
40  
41  
42 435 Infect Dis 2015; 60: 1308-16.
- 43  
44  
45  
46 436 15. ESAC-Net surveillance data. Surveillance of antimicrobial consumption in Europe.  
47  
48  
49 437 Available at: <http://ecdc.europa.eu/en/publications/Publications/antimicrobial->  
50  
51  
52 438 consumption-europe-esac-net-2012.pdf (Accessed: August 3, 2018).
- 53  
54  
55  
56 439 16. Shapiro DJ, Hicks LA, Pavia AT et al. Antibiotic prescribing for adults in ambulatory  
57  
58  
59  
60

- 1  
2  
3  
4  
5  
6  
7 440 care in the USA, 2007-09. *J Antimicrob Chemother* 2014; 69: 234-40.  
8  
9  
10 441 17. Dolk FCK, Pouwels KB, Smith DRM et al. Antibiotics in primary care in England:  
11  
12  
13 442 which antibiotics are prescribed and for which conditions? *J Antimicrob Chemother*  
14  
15  
16 443 2018; 73: ii2-ii10.  
17  
18  
19 444 18. Harris AM, Hicks LA, Qaseem A. Appropriate Antibiotic Use for Acute Respiratory  
20  
21  
22  
23 445 Tract Infection in Adults: Advice for High-Value Care From the American College of  
24  
25  
26 446 Physicians and the Centers for Disease Control and Prevention. *Ann Intern Med* 2016;  
27  
28  
29 447 164: 425-434.  
30  
31  
32  
33 448 19. Bisno AL. Acute pharyngitis: etiology and diagnosis. *Pediatrics* 1996; 97: 949-54.  
34  
35  
36 449 20. Ebell MH, Smith MA, Barry HC et al. The rational clinical examination. Does this  
37  
38  
39 450 patient have strep throat? *JAMA* 2000; 284: 2912-8.  
40  
41  
42  
43 451 21. Butler CC, Rollnick S, Pill R et al. Understanding the culture of prescribing:  
44  
45  
46 452 qualitative study of general practitioners' and patients' perceptions of antibiotics for sore  
47  
48  
49 453 throats. *BMJ* 1998; 317: 637-42.  
50  
51  
52  
53 454 22. Kumar S, Little P, Britten N. Why do general practitioners prescribe antibiotics for  
54  
55  
56 455 sore throat? Grounded theory interview study. *BMJ* 2003; 326: 138.  
57  
58  
59  
60

- 1  
2  
3  
4  
5  
6  
7 456 23. Adriaenssens N, Coenen S, Tonkin-Crine S, et al. European Surveillance of  
8  
9  
10 457 Antimicrobial Consumption (ESAC): disease-specific quality indicators for outpatient  
11  
12  
13 458 antibiotic prescribing. *BMJ Qual Saf* 2011; 20: 764-72.
- 16 459 24. Lee ML, Cho CY, Hsu CL, et al. Recent trends in antibiotic prescriptions for acute  
17  
18  
19  
20 460 respiratory tract infections in pediatric ambulatory care in Taiwan, 2000-2009: A  
21  
22  
23 461 nationwide population-based study. *J Microbiol Immunol Infect* 2016; 49: 554-560.
- 26 462 25. Silverman M, Povitz M, Sontrop JM, et al. Antibiotic Prescribing for Nonbacterial  
27  
28  
29  
30 463 Acute Upper Respiratory Infections in Elderly Persons. *Ann Intern Med* 2017; 166: 765-  
31  
32  
33 464 774.
- 36 465 26. Akkerman AE, van der Wouden JC, Kuyvenhoven MM et al. Antibiotic prescribing  
37  
38  
39  
40 466 for respiratory tract infections in Dutch primary care in relation to patient age and clinical  
41  
42  
43 467 entities. *J Antimicrob Chemother* 2004; 54: 1116-1121.
- 46 468 27. Schmidt ML, Spencer MD, Davidson LE. Patient, Provider, and Practice  
47  
48  
49  
50 469 Characteristics Associated with Inappropriate Antimicrobial Prescribing in Ambulatory  
51  
52  
53 470 Practices. *Infect Control Hosp Epidemiol*. 2018; 39:307-315.

1 **Table S1.** Classification of infections by groups with corresponding ICD-10 codes  
 2

|                                                                        | Diagnosis                          | ICD-10 codes                                                                                                                                                                                                                                                                                                                                                                                                                                                                                                                                                                                                                                                            |
|------------------------------------------------------------------------|------------------------------------|-------------------------------------------------------------------------------------------------------------------------------------------------------------------------------------------------------------------------------------------------------------------------------------------------------------------------------------------------------------------------------------------------------------------------------------------------------------------------------------------------------------------------------------------------------------------------------------------------------------------------------------------------------------------------|
| <b>Group 1: Infections for which antibiotics are usually indicated</b> |                                    |                                                                                                                                                                                                                                                                                                                                                                                                                                                                                                                                                                                                                                                                         |
| 1                                                                      | Miscellaneous bacterial infections | Tuberculosis (A15–A19); Certain zoonotic bacterial diseases (A20–A28); Other bacterial diseases including listeriosis, diphtheria, bartonellosis, erysipelas, and rickettsioses (A30–A37, A39–A49, A75–A79); Bacterial meningitis, encephalitis, and intracranial abscess (G00, G042, G049, G06); Mastoiditis (H70); Infective endocarditis (I33, T826); Acute epiglottitis (J051); Deep neck space infections (J36, J390, J391); Abscess of lung and mediastinum; Pyothorax (J85, J86); Infections of the jaws and mouth (K102, K122); Infections due to cardiac and vascular devices (T827); Infection due to internal prosthetic devices, implants and grafts (T857) |
| 2                                                                      | Sexually transmitted infections    | Infections with a predominantly sexual mode of transmission (A50–A64); Other spirochetal diseases (A65–A69); Other diseases caused by chlamydia (A70–A74)                                                                                                                                                                                                                                                                                                                                                                                                                                                                                                               |
| 3                                                                      | Pneumonia                          | Bacterial pneumonia (J13–J18)                                                                                                                                                                                                                                                                                                                                                                                                                                                                                                                                                                                                                                           |
| 4                                                                      | Abdominal infections               | Acute appendicitis (K35); Abscess of anal and rectal regions, intestine, and liver (K61, K630, K750); Peritonitis (K65); Cholecystitis and cholangitis (K800, K801, K803, K804, K810, K819, K830)                                                                                                                                                                                                                                                                                                                                                                                                                                                                       |
| 5                                                                      | Orthopedic infections              | Pyogenic arthritis and prosthetic joint infection (M00, T845); necrotizing fasciitis (M726); Infective myositis, synovitis and bursitis (M600, M650–M651, M710–M711); Osteomyelitis (M462–M465, M86)                                                                                                                                                                                                                                                                                                                                                                                                                                                                    |
| 6                                                                      | Urinary tract infections           | Acute pyelonephritis/pyonephrosis ((N10, N12, N136); Renal abscess (N151); Kidney infection, unspecified (N159); Acute cystitis (N300); Cystitis, unspecified (N308, N309); Urethritis and urethral abscess (N34); Urinary tract infections, unspecified (N390); Prostatitis and abscess of prostate (N41); Orchitis and epididymitis (N45); Catheter associated urinary tract infections (T835)                                                                                                                                                                                                                                                                        |



|   |                              |                                                                                                               |
|---|------------------------------|---------------------------------------------------------------------------------------------------------------|
| 7 | Pelvic inflammatory diseases | Pelvic inflammatory diseases (N70–N73, N751, N760–N764); Infections of genitourinary tract in pregnancy (O23) |
|---|------------------------------|---------------------------------------------------------------------------------------------------------------|

### Group 2 : Infections for which antibiotics are potentially indicated

|   |                                        |                                                                                                                                                                                                                                                                                           |
|---|----------------------------------------|-------------------------------------------------------------------------------------------------------------------------------------------------------------------------------------------------------------------------------------------------------------------------------------------|
| 1 | Gastrointestinal infections            | Intestinal infectious diseases (A00–A07, A09); Diverticulitis of intestine (K57)                                                                                                                                                                                                          |
| 2 | Skin, cutaneous and mucosal infections | Infections of other skin and subcutaneous tissue including cellulitis, cutaneous abscess, furuncle, carbuncle, impetigo, acute lymphadenitis, folliculitis, mastitis (H050, J340, L00–L08, N61, T814); Infections of the eye and adnexa (H00, H440); Infective otitis externa (H600–H603) |
| 3 | Suppurative otitis media               | Suppurative and unspecified otitis media (H66)                                                                                                                                                                                                                                            |
| 4 | Pharyngitis                            | Streptococcal pharyngitis/tonsillitis (J020, J030); Acute pharyngitis/tonsillitis, unspecified (J029, J039); Scarlet fever (A38)                                                                                                                                                          |
| 5 | Sinusitis                              | Acute sinusitis (J01); Chronic sinusitis (J32)                                                                                                                                                                                                                                            |
| 6 | Bronchitis and bronchiolitis with COPD | Acute bronchitis (J20) *; Acute bronchiolitis (J21) *; Unspecified acute lower respiratory infection (J22) *                                                                                                                                                                              |
| 7 | Acne                                   | Acne (L70)                                                                                                                                                                                                                                                                                |

### Group 3: Infections for which antibiotics are rarely indicated

|   |                                           |                                                                                                                                                                                                                                                                                                     |
|---|-------------------------------------------|-----------------------------------------------------------------------------------------------------------------------------------------------------------------------------------------------------------------------------------------------------------------------------------------------------|
| 1 | Nonbacterial gastrointestinal infections  | Viral and other specified intestinal infections (A08)                                                                                                                                                                                                                                               |
| 2 | Nonsuppurative otitis media               | Nonsuppurative otitis media (H65)                                                                                                                                                                                                                                                                   |
| 3 | Viral upper respiratory infection         | Acute nasopharyngitis [common cold] (J00); Acute pharyngitis/tonsillitis due to other specified organisms (J028, J038); Acute laryngitis and tracheitis (J04); Acute obstructive laryngitis [croup] (J050); Acute upper respiratory infections of multiple and unspecified sites (J06); Cough (R05) |
| 4 | Influenza                                 | Influenza (J10, J11)                                                                                                                                                                                                                                                                                |
| 5 | Viral pneumonia                           | Viral pneumonia (J12)                                                                                                                                                                                                                                                                               |
| 6 | Bronchitis and bronchiolitis without COPD | Acute bronchitis (J20) **; Acute bronchiolitis (J21) **; Unspecified acute lower respiratory infection (J22) **                                                                                                                                                                                     |
| 7 | Noninfectious diarrhea                    | Noninfective gastroenteritis and colitis, unspecified (K529)                                                                                                                                                                                                                                        |

1  
2  
3  
4  
5 8 Fever Fever of unknown origin (R50)  
6

7 3 \*includes visits in which ICD-10 code for COPD (J41–J44) are present

8 4 \*\*includes visits in which ICD-10 code for COPD (J41–J44) are not present  
9  
10  
11  
12  
13  
14  
15  
16  
17  
18  
19  
20  
21  
22  
23  
24  
25  
26  
27  
28  
29  
30  
31  
32  
33  
34  
35  
36  
37  
38  
39  
40  
41  
42  
43  
44  
45  
46  
47  
48  
49  
50  
51  
52  
53  
54  
55  
56  
57  
58  
59  
60

For peer review only

## STROBE Statement—checklist of items that should be included in reports of observational studies

|                              | Item No | Recommendation                                                                                                                                                                                                                                                                                                                                                                                                                                                         | Page No |
|------------------------------|---------|------------------------------------------------------------------------------------------------------------------------------------------------------------------------------------------------------------------------------------------------------------------------------------------------------------------------------------------------------------------------------------------------------------------------------------------------------------------------|---------|
| <b>Title and abstract</b>    | 1       | (a) Indicate the study's design with a commonly used term in the title or the abstract                                                                                                                                                                                                                                                                                                                                                                                 | 1       |
|                              |         | (b) Provide in the abstract an informative and balanced summary of what was done and what was found                                                                                                                                                                                                                                                                                                                                                                    | 3       |
| <b>Introduction</b>          |         |                                                                                                                                                                                                                                                                                                                                                                                                                                                                        |         |
| Background/rationale         | 2       | Explain the scientific background and rationale for the investigation being reported                                                                                                                                                                                                                                                                                                                                                                                   | 5       |
| Objectives                   | 3       | State specific objectives, including any prespecified hypotheses                                                                                                                                                                                                                                                                                                                                                                                                       | 6       |
| <b>Methods</b>               |         |                                                                                                                                                                                                                                                                                                                                                                                                                                                                        |         |
| Study design                 | 4       | Present key elements of study design early in the paper                                                                                                                                                                                                                                                                                                                                                                                                                | 7       |
| Setting                      | 5       | Describe the setting, locations, and relevant dates, including periods of recruitment, exposure, follow-up, and data collection                                                                                                                                                                                                                                                                                                                                        | 7–8     |
| Participants                 | 6       | (a) <i>Cohort study</i> —Give the eligibility criteria, and the sources and methods of selection of participants. Describe methods of follow-up<br><i>Case-control study</i> —Give the eligibility criteria, and the sources and methods of case ascertainment and control selection. Give the rationale for the choice of cases and controls<br><i>Cross-sectional study</i> —Give the eligibility criteria, and the sources and methods of selection of participants | 9       |
|                              |         | (b) <i>Cohort study</i> —For matched studies, give matching criteria and number of exposed and unexposed<br><i>Case-control study</i> —For matched studies, give matching criteria and the number of controls per case                                                                                                                                                                                                                                                 |         |
| Variables                    | 7       | Clearly define all outcomes, exposures, predictors, potential confounders, and effect modifiers. Give diagnostic criteria, if applicable                                                                                                                                                                                                                                                                                                                               | 9       |
| Data sources/<br>measurement | 8*      | For each variable of interest, give sources of data and details of methods of assessment (measurement). Describe comparability of assessment methods if there is more than one group                                                                                                                                                                                                                                                                                   | 8–9     |
| Bias                         | 9       | Describe any efforts to address potential sources of bias                                                                                                                                                                                                                                                                                                                                                                                                              |         |
| Study size                   | 10      | Explain how the study size was arrived at                                                                                                                                                                                                                                                                                                                                                                                                                              |         |
| Quantitative variables       | 11      | Explain how quantitative variables were handled in the analyses. If applicable, describe which groupings were chosen and why                                                                                                                                                                                                                                                                                                                                           |         |
| Statistical methods          | 12      | (a) Describe all statistical methods, including those used to control for confounding                                                                                                                                                                                                                                                                                                                                                                                  | 9–10    |
|                              |         | (b) Describe any methods used to examine subgroups and interactions                                                                                                                                                                                                                                                                                                                                                                                                    | 9–10    |
|                              |         | (c) Explain how missing data were addressed                                                                                                                                                                                                                                                                                                                                                                                                                            |         |
|                              |         | (d) <i>Cohort study</i> —If applicable, explain how loss to follow-up was addressed<br><i>Case-control study</i> —If applicable, explain how matching of cases and controls was addressed<br><i>Cross-sectional study</i> —If applicable, describe analytical methods taking account of sampling strategy                                                                                                                                                              |         |
|                              |         | (e) Describe any sensitivity analyses                                                                                                                                                                                                                                                                                                                                                                                                                                  |         |

Continued on next page

| <b>Results</b>           |     |                                                                                                                                                                                                              |           |
|--------------------------|-----|--------------------------------------------------------------------------------------------------------------------------------------------------------------------------------------------------------------|-----------|
| Participants             | 13* | (a) Report numbers of individuals at each stage of study—eg numbers potentially eligible, examined for eligibility, confirmed eligible, included in the study, completing follow-up, and analysed            | 11        |
|                          |     | (b) Give reasons for non-participation at each stage                                                                                                                                                         |           |
|                          |     | (c) Consider use of a flow diagram                                                                                                                                                                           |           |
| Descriptive data         | 14* | (a) Give characteristics of study participants (eg demographic, clinical, social) and information on exposures and potential confounders                                                                     | 11        |
|                          |     | (b) Indicate number of participants with missing data for each variable of interest                                                                                                                          |           |
|                          |     | (c) <i>Cohort study</i> —Summarise follow-up time (eg, average and total amount)                                                                                                                             |           |
| Outcome data             | 15* | <i>Cohort study</i> —Report numbers of outcome events or summary measures over time                                                                                                                          | 11        |
|                          |     | <i>Case-control study</i> —Report numbers in each exposure category, or summary measures of exposure                                                                                                         |           |
|                          |     | <i>Cross-sectional study</i> —Report numbers of outcome events or summary measures                                                                                                                           |           |
| Main results             | 16  | (a) Give unadjusted estimates and, if applicable, confounder-adjusted estimates and their precision (eg, 95% confidence interval). Make clear which confounders were adjusted for and why they were included | 12–<br>13 |
|                          |     | (b) Report category boundaries when continuous variables were categorized                                                                                                                                    |           |
|                          |     | (c) If relevant, consider translating estimates of relative risk into absolute risk for a meaningful time period                                                                                             |           |
| Other analyses           | 17  | Report other analyses done—eg analyses of subgroups and interactions, and sensitivity analyses                                                                                                               |           |
| <b>Discussion</b>        |     |                                                                                                                                                                                                              |           |
| Key results              | 18  | Summarise key results with reference to study objectives                                                                                                                                                     | 14–<br>18 |
| Limitations              | 19  | Discuss limitations of the study, taking into account sources of potential bias or imprecision. Discuss both direction and magnitude of any potential bias                                                   | 18–<br>19 |
| Interpretation           | 20  | Give a cautious overall interpretation of results considering objectives, limitations, multiplicity of analyses, results from similar studies, and other relevant evidence                                   | 19–<br>20 |
| Generalisability         | 21  | Discuss the generalisability (external validity) of the study results                                                                                                                                        | 18        |
| <b>Other information</b> |     |                                                                                                                                                                                                              |           |
| Funding                  | 22  | Give the source of funding and the role of the funders for the present study and, if applicable, for the original study on which the present article is based                                                | 21        |

\*Give information separately for cases and controls in case-control studies and, if applicable, for exposed and unexposed groups in cohort and cross-sectional studies.

**Note:** An Explanation and Elaboration article discusses each checklist item and gives methodological background and published examples of transparent reporting. The STROBE checklist is best used in conjunction with this article (freely available on the Web sites of PLoS Medicine at <http://www.plosmedicine.org/>, Annals of Internal Medicine at <http://www.annals.org/>, and Epidemiology at <http://www.epidem.com/>). Information on the STROBE Initiative is available at [www.strobe-statement.org](http://www.strobe-statement.org).

# BMJ Open

## Antibiotic prescription among outpatients in a prefecture of Japan, 2012–2013: A retrospective claims database study

|                                 |                                                                                                                                                                                                                                                                                                                                                                                                                                                                                                                                                                                                                                                                                                                                                                                                     |
|---------------------------------|-----------------------------------------------------------------------------------------------------------------------------------------------------------------------------------------------------------------------------------------------------------------------------------------------------------------------------------------------------------------------------------------------------------------------------------------------------------------------------------------------------------------------------------------------------------------------------------------------------------------------------------------------------------------------------------------------------------------------------------------------------------------------------------------------------|
| Journal:                        | <i>BMJ Open</i>                                                                                                                                                                                                                                                                                                                                                                                                                                                                                                                                                                                                                                                                                                                                                                                     |
| Manuscript ID                   | bmjopen-2018-026251.R2                                                                                                                                                                                                                                                                                                                                                                                                                                                                                                                                                                                                                                                                                                                                                                              |
| Article Type:                   | Research                                                                                                                                                                                                                                                                                                                                                                                                                                                                                                                                                                                                                                                                                                                                                                                            |
| Date Submitted by the Author:   | 21-Feb-2019                                                                                                                                                                                                                                                                                                                                                                                                                                                                                                                                                                                                                                                                                                                                                                                         |
| Complete List of Authors:       | Hashimoto, Hideki; Jichi Medical University Hospital, Division of General Internal Medicine<br>Matsui, Hiroki; Jichi Medical University, Data Science Center; School of Public Health, University of Tokyo, Department of Clinical Epidemiology and Health Economics<br>Sasabuchi, Yusuke; Jichi Medical University, Data Science Center<br>Yasunaga, Hideo; Jichi Medical University, Data Science Center; School of Public Health, The University of Tokyo, Department of Clinical Epidemiology and Health Economics<br>Kotani, Kazuhiko; Jichi Medical University, Division of Community and Family Medicine<br>Nagai, Ryozi; Jichi Medical University, President<br>Hatakeyama, Shuji; Jichi Medical University Hospital, Division of General Internal Medicine/Division of Infectious Diseases |
| <b>Primary Subject Heading</b>: | Infectious diseases                                                                                                                                                                                                                                                                                                                                                                                                                                                                                                                                                                                                                                                                                                                                                                                 |
| Secondary Subject Heading:      | Epidemiology, Public health                                                                                                                                                                                                                                                                                                                                                                                                                                                                                                                                                                                                                                                                                                                                                                         |
| Keywords:                       | Epidemiology < INFECTIOUS DISEASES, Public health < INFECTIOUS DISEASES, INFECTIOUS DISEASES                                                                                                                                                                                                                                                                                                                                                                                                                                                                                                                                                                                                                                                                                                        |
|                                 |                                                                                                                                                                                                                                                                                                                                                                                                                                                                                                                                                                                                                                                                                                                                                                                                     |

SCHOLARONE™  
Manuscripts

1  
2  
3  
4  
5  
6  
7 **1 Antibiotic prescription among outpatients in a prefecture of Japan, 2012–2013: A**  
8  
9  
10 **2 retrospective claims database study**

11  
12  
13 3

14  
15  
16 4 Hideki Hashimoto<sup>1</sup>, Hiroki Matsui<sup>2,3</sup>, Yusuke Sasabuchi<sup>2</sup>, Hideo Yasunaga<sup>2,3</sup>, Kazuhiko  
17  
18  
19 5 Kotani<sup>4</sup>, Ryozo Nagai<sup>5</sup>, Shuji Hatakeyama<sup>1,6\*</sup>

20  
21  
22  
23 6

24  
25  
26 7 <sup>1</sup>Division of General Internal Medicine, Jichi Medical University Hospital, 3311-1  
27  
28  
29 8 Yakushiji, Shimotsuke-shi, Tochigi 329-0498, Japan.

30  
31  
32  
33 9 <sup>2</sup>Data Science Center, Jichi Medical University, 3311-1 Yakushiji, Shimotsuke-shi,  
34  
35  
36 10 Tochigi 329-0498, Japan.

37  
38  
39  
40 11 <sup>3</sup>Department of Clinical Epidemiology and Health Economics, School of Public Health,  
41  
42  
43 12 University of Tokyo, 7-3-1 Hongo, Bunkyo-ku, Tokyo 113-0033, Japan.

44  
45  
46 13 <sup>4</sup>Division of Community and Family Medicine, Jichi Medical University, 3311-1  
47  
48  
49 14 Yakushiji, Shimotsuke-shi, Tochigi 329-0498, Japan.

50  
51  
52  
53 15 <sup>5</sup>President, Jichi Medical University, 3311-1 Yakushiji, Shimotsuke-shi, Tochigi 329-  
54  
55  
56 16 0498, Japan.

1  
2  
3  
4  
5  
6  
7 17 <sup>6</sup>Division of Infectious Diseases, Jichi Medical University Hospital, 3311-1 Yakushiji,  
8  
9  
10 18 Shimotsuke-shi, Tochigi 329-0498, Japan.

11  
12  
13 19

14  
15  
16 20 **\*Corresponding author:**

17  
18  
19 21 Shuji Hatakeyama, M.D., Ph.D.

20  
21  
22  
23 22 Division of General Internal Medicine/Division of Infectious Diseases, Jichi Medical  
24  
25  
26 23 University Hospital, 3311-1 Yakushiji, Shimotsuke-shi, Tochigi 329-0498, Japan.

27  
28  
29 24 Phone: +81-285-58-7498

30  
31  
32 25 Fax: +81-285-40-5160

33  
34  
35 26 E-mail: shatake-ky@umin.ac.jp

36  
37  
38  
39 27

40  
41  
42  
43 28 **Key words:** antibiotic, antimicrobial stewardship, antimicrobial-resistance, big data,  
44  
45  
46 29 inappropriate prescribing

47  
48  
49 30 **Running title:** Antibiotic prescriptions in Japan

50  
51  
52 31 **Word count for the main text:** 3,002 words

53  
54  
55  
56 32

1  
2  
3  
4  
5  
6  
7 **33 Abstract**  
8  
9

10 **34 Objectives:** To investigate oral antibiotic prescribing patterns and identify factors  
11  
12  
13 **35** associated with antibiotic prescriptions, with the aim of guiding future interventions to  
14  
15  
16 **36** reduce inappropriate prescribing.  
17

18  
19  
20 **37 Design:** Retrospective cohort study.  
21  
22

23 **38 Setting:** Database of public health insurance claims in Kumamoto prefecture (Japan).  
24  
25

26 **39 Participants:** Beneficiaries of the national or late elders' health insurance system  
27  
28  
29  
30 between April 2012 and March 2013.  
31  
32

33 **41 Main outcome measures:** Of 7,770,481 outpatient visits, 682,822 had a code for  
34  
35  
36 **42** antibiotics (860 antibiotic prescriptions per 1000 population). Third-generation  
37  
38  
39  
40 **43** cephalosporins (35%), macrolides (32%), and quinolones (21%) were most frequently  
41  
42  
43 **44** prescribed. Acute respiratory tract infections (ARTIs), including viral upper respiratory  
44  
45  
46 **45** infections (URI) (22%), pharyngitis (18%), bronchitis (11%), and sinusitis (10%) were  
47  
48  
49  
50 **46** most frequently diagnosed for antibiotic prescribing, followed by gastrointestinal (9%),  
51  
52  
53 **47** urinary tract (8%), and skin, cutaneous, and mucosal infections (5%). Antibiotic  
54  
55  
56 **48** prescribing rates for viral URI, pharyngitis, bronchitis, sinusitis, and gastrointestinal  
57  
58  
59  
60



1  
2  
3  
4  
5  
6  
7 49 infections were 35%, 54%, 53%, 57%, and 30%, respectively. In multivariable analysis  
8  
9  
10 50 for ARTIs and gastrointestinal infections, patient age (10–19 years especially), patient  
11  
12  
13 51 sex (male), and facility scale (free-standing clinics or small-scale hospital-based clinics)  
14  
15  
16 52 were associated with increased antibiotic prescribing.  
17  
18  
19

20 53 **Conclusions:** Broad-spectrum antibiotics constituted 88% of oral outpatient antibiotic  
21  
22  
23 54 prescriptions. Approximately 70% of antibiotics were prescribed for ARTIs and  
24  
25  
26 55 gastroenteritis with modest benefit from antibiotic treatment. The quality of antibiotic  
27  
28  
29 56 prescribing needs to be improved. Antimicrobial stewardship interventions should target  
30  
31  
32  
33 57 ARTIs and gastroenteritis, as well as young patients and small-scale institutions.  
34  
35  
36  
37  
38  
39  
40  
41  
42  
43  
44  
45  
46  
47  
48  
49  
50  
51  
52  
53  
54  
55  
56  
57  
58  
59  
60

1  
2  
3  
4  
5  
6  
7 **58 Strength and limitations of this study**  
8  
9

- 10 • This is the first Japanese study to describe outpatient antibiotic prescription patterns  
11  
12  
13 60 linked to individual diagnosis data, comprehensively, by use of the public health  
14  
15  
16 61 insurance claims database.  
17  
18  
19  
20 62 • This study included patients older than 65 years of age, who have not typically been  
21  
22  
23 63 included in previous Japanese studies.  
24  
25  
26 64 • The accuracy of the diagnosis has not been validated due to the nature of the  
27  
28  
29  
30 65 administrative claims database.  
31  
32  
33 66 • There are some unmeasured potential confounding factors such as out-of-hours  
34  
35  
36 67 visits and physician specialty.  
37  
38  
39  
40  
41  
42  
43  
44  
45  
46  
47  
48  
49  
50  
51  
52  
53  
54  
55  
56  
57  
58  
59  
60

## 69 Introduction

70 There is a growing concern about antimicrobial-resistant bacterial infections.  
71 Antimicrobial resistance results in increased health care costs, prolonged hospitalization,  
72 and death.<sup>1-3</sup> The World Health Organization launched the global action plan to combat  
73 the antimicrobial-resistant bacteria in 2015<sup>4</sup> and requested Member States to endorse  
74 national action plans within two years. The government of Japan launched a national  
75 action plan in 2016 in response to the request.<sup>5</sup>

76 Since antimicrobial use is one of the important factors in the emergence of antimicrobial  
77 resistance,<sup>6</sup> it is essential to reduce the inappropriate use of antibiotics. In Japan, a  
78 previous sales data-based study revealed that oral antibiotics account for more than 90%  
79 of total antibiotic consumption and that broad-spectrum antibiotics (third-generation  
80 cephalosporins, macrolides, and fluoroquinolones) account for 77% of oral antibiotic  
81 consumption (daily doses defined per 1000 inhabitants per day).<sup>7</sup> The Japanese national  
82 action plan aims to reduce the total antimicrobial use to two-thirds of current use, and the  
83 use of oral cephalosporins, quinolones, and macrolides to one-half, by 2020. To reduce  
84 inappropriate antimicrobial use, it is important to determine the antimicrobial prescribing

1  
2  
3  
4  
5  
6  
7 85 patterns and factors associated with antibiotic prescription. However, such information  
8  
9  
10 86 has been limited in Japan to date. Although a few recent studies<sup>8,9</sup> described the  
11  
12  
13 87 prescription patterns for upper respiratory tract infections and bronchitis, the prescription  
14  
15  
16 88 patterns of infections other than acute respiratory tract infections (ARTIs) have not been  
17  
18  
19  
20 89 clarified. In addition, patients older than 65 years of age have not been commonly  
21  
22  
23 90 included in these studies, because these studies relied on data from an employee-based  
24  
25  
26 91 insurance claims database. With the high rate in aging population in Japan, it is important  
27  
28  
29  
30 92 to describe the prescription patterns in elderly patients.

31  
32  
33 93 In this study, we described outpatient oral antibiotic prescribing patterns for all  
34  
35  
36 94 infections and in all ages, using the Japanese administrative claims database. Furthermore,  
37  
38  
39  
40 95 we aimed to identify factors associated with antibiotic prescriptions for ARTIs and  
41  
42  
43 96 gastrointestinal infections, the targets of the antimicrobial stewardship guideline  
44  
45  
46 97 formulated by the government of Japan in 2017.<sup>10</sup>

1  
2  
3  
4  
5  
6  
7 **99 Methods**  
8  
9

10 *Data sources*  
11  
12

13 101 The current population of Japan is approximately 127 million. All citizens are enrolled  
14  
15  
16 102 in a universal health coverage insurance program provided by the social insurance system  
17  
18  
19 103 (for employees younger than 75 years of age), national health insurance system (for self-  
20  
21  
22  
23 104 employed or unemployed people younger than 75 years of age), and the late elders' health  
24  
25  
26 105 insurance system (for those aged 75 years and older). In Japan, patients can visit any  
27  
28  
29 106 clinic of their choice. All physicians working at any free-standing or hospital-based  
30  
31  
32  
33 107 clinics can provide primary care and prescribe antibiotics.  
34  
35

36 108 We conducted a retrospective analysis using the administrative health insurance claims  
37  
38  
39 109 database of Kumamoto prefecture, situated in the southwestern region of Japan, with a  
40  
41  
42  
43 110 population of about 1.7 million. This database covers approximately 780,000 residents of  
44  
45  
46 111 Kumamoto prefecture (44% of the population) who were beneficiaries of the national  
47  
48  
49 112 health insurance system,<sup>11</sup> or the late elders' health insurance system.<sup>12</sup> The participants  
50  
51  
52  
53 113 in this study may be older than the general population of Japan.  
54  
55

56 114 The database is composed of medical and pharmacy claims. It provides monthly  
57  
58  
59  
60

1  
2  
3  
4  
5  
6  
7 115 information about patient demographics (year and month of birth and sex), diagnoses,  
8  
9  
10 116 date of diagnoses, medical procedures, medications, scale (number of beds) of the  
11  
12  
13 117 medical facility, as well as the identification numbers assigned to each individual, medical  
14  
15  
16 118 facility, and dispensing pharmacy. At the end of each month, claims are registered from  
17  
18  
19  
20 119 each medical facility. The diagnoses were recorded by physicians of each medical facility  
21  
22  
23 120 and coded according to the International Classification of Diseases and Related Health  
24  
25  
26 121 Problems, 10th Revision (ICD-10).  
27  
28  
29

30 122

31  
32  
33 123 *Data preparation*  
34  
35

36 124 We linked the medical and pharmacy claims on the database using an identification  
37  
38  
39  
40 125 number unique to each patient, medical facility, and dispensing pharmacy. We identified  
41  
42  
43 126 all newly diagnosed outpatients, with any infectious diseases, between April 2012 and  
44  
45  
46 127 March 2013. Infectious diseases diagnoses were categorized according to the indication  
47  
48  
49  
50 128 for antibiotic use (Table S1, available as supplementary data). This categorization was  
51  
52  
53 129 based on the study by Fleming-Dutra KE *et al.*<sup>13</sup> Bronchitis and bronchiolitis were divided  
54  
55  
56 130 into two categories based on whether the patients had chronic obstructive pulmonary  
57  
58  
59  
60

1  
2  
3  
4  
5  
6  
7 131 disease (COPD) as comorbidity or not, because of differing need of treatment with  
8  
9  
10 132 antibiotics. If a patient had multiple infectious diagnoses in one month, a single infectious  
11  
12  
13 133 diagnosis, selected in order from Group 1 (antibiotics are usually indicated) to Group 3  
14  
15  
16 134 (antibiotics are rarely indicated), and the first-listed diagnosis in alphabetical order of  
17  
18  
19  
20 135 ICD-10 codes in the selected group was included in the analyses (Table S1).

21  
22  
23 136 We also identified all outpatients with any antibiotic prescriptions. Topical,  
24  
25  
26 137 intramuscular, and intravenous antibiotics were excluded. Antibiotics were categorized  
27  
28  
29  
30 138 according to the Anatomical Therapeutic Chemical (ATC) classification system  
31  
32  
33 139 (<http://www.whooc.no/atcddd/>) as follows: tetracyclines (J01A), penicillins (J01C), first-  
34  
35  
36 140 and second-generation cephalosporins (J01DB and J01DC), third-generation  
37  
38  
39  
40 141 cephalosporins (J01DD), sulfonamides and trimethoprim (J01E), macrolides (J01FA),  
41  
42  
43 142 quinolones (J01M), and others (J01B, J01DH, J01DI, J01FF, J01G, and J01X). We  
44  
45  
46 143 assumed that third-generation cephalosporins accounted for most of cephalosporins used  
47  
48  
49  
50 144 in Japan; hence, we divided cephalosporins into two groups: first/second- and third-  
51  
52  
53 145 generation cephalosporins. Antibiotics were linked to the infectious diagnoses in each  
54  
55  
56 146 patient's claims when both the code of antibiotics and the code of diagnoses were

1  
2  
3  
4  
5  
6  
7 147 recorded in the same month.  
8  
9

10 148  
11  
12

13 149 *Data Analysis*  
14  
15

16 150 We calculated the frequency of antibiotic prescription for all visits with infections  
17  
18  
19  
20 151 (according to diagnosis and antibiotic class). For ARTIs (including pharyngitis, sinusitis,  
21  
22  
23 152 bronchitis/bronchiolitis, and viral upper respiratory infections [URI]) and gastrointestinal  
24  
25  
26 153 infections, we performed separate multivariable logistic regression analyses to identify  
27  
28  
29  
30 154 the factors associated with antibiotic prescriptions. The variables were as follows: age  
31  
32  
33 155 and sex of patients and scale (number of beds) of the medical facilities. Generalized  
34  
35  
36 156 estimating equations with exchangeable correlation structure were used to account for the  
37  
38  
39  
40 157 clustering of the medical facilities.  $P$ -values  $< 0.05$  were considered statistically  
41  
42  
43 158 significant. All statistical analyses were performed with the statistical package R, v.3.5.0  
44  
45  
46 159 (<http://cran.r-project.org>).  
47  
48  
49

50 160  
51  
52

53 161 *Patient involvement*  
54  
55

56 162 No patients were involved in the development of the research question or the outcome  
57  
58  
59  
60



1  
2  
3  
4  
5  
6  
7 163 measures, nor were they involved in developing plans for design or implementation of  
8  
9  
10 164 the study. No patients were asked for advice regarding the interpretation or writing of  
11  
12  
13 165 results. There are no plans to disseminate the study results to the relevant patient  
14  
15  
16  
17 166 community.

For peer review only

## 168 **Results**

169 In total, there were 7,770,481 outpatient visits between April 2012 and March 2013.  
170 Antibiotics were prescribed in 682,822 visits (860 antibiotic prescriptions per 1000  
171 population). Among these, third-generation cephalosporins were most frequently  
172 prescribed (237,372 visits, 35%), followed by macrolides (215,656 visits, 32%) and  
173 quinolones (145,135 visits, 21%). This trend was observed regardless of age group (Table  
174 1) and scale of the medical facility (Table 2), except for those less than 9 years of age in  
175 whom the systemic use of quinolones is not recommended. Information about facility  
176 scale was available from 669,086 out of 682,822 visits. Of these, antibiotics were  
177 prescribed most frequently at free-standing clinics (530,916 visits, 79%), followed by  
178 small-scale (< 200 beds; 78,546 visits, 12%), medium-scale (200–499 beds; 45,271 visits,  
179 7%), and large-scale (500 beds or more; 14,353 visits, 2%) hospital-based clinics (Table  
180 2).

181 We were able to link the individual diagnoses to the antibiotic prescription in 447,232  
182 visits (Table 3). Of these patients, approximately 60% of antibiotics were prescribed for  
183 ARTIs, including viral URI (96,989 visits, 22%), pharyngitis (78,469 visits, 18%),

1  
2  
3  
4  
5  
6  
7 184 bronchitis without COPD (47,248 visits, 11%), and sinusitis (45,456 visits, 10%). Other  
8  
9  
10 185 than ARTIs, there were frequent antibiotic prescriptions for gastrointestinal infections  
11  
12  
13 186 (41,309 visits, 9%), urinary tract infections (37,674 visits, 8%), and skin, cutaneous, and  
14  
15  
16 187 mucosal infections (23,572 visits, 5%). The antibiotic prescription rates for viral URI,  
17  
18  
19  
20 188 pharyngitis, bronchitis (without underlying COPD), sinusitis, and gastrointestinal  
21  
22  
23 189 infections were 35% (96,989 out of 274,441 visits), 54% (78,469 out of 146,508 visits),  
24  
25  
26 190 53% (47,248 out of 89,479 visits), 57% (45,456 out of 80,078 visits), and 30% (41,309  
27  
28  
29  
30 191 out of 137,661 visits), respectively (Table 3).

31  
32  
33 192 Table 4 shows the results of the logistic regression analysis of antibiotic prescription for  
34  
35  
36 193 ARTIs. Male sex was associated with more antibiotic prescription (adjusted odds ratio  
37  
38  
39  
40 194 [OR], 1.10; 95% confidence interval [CI], 1.08 to 1.11). With patients aged 65 years or  
41  
42  
43 195 older as reference, patients aged 10 to 19 years were more likely to be prescribed  
44  
45  
46 196 antibiotics (adjusted OR, 2.75; 95% CI, 2.69 to 2.82), followed by patients aged 20 to 64  
47  
48  
49  
50 197 years (adjusted OR, 1.92; 95% CI, 1.89 to 1.94), and patients younger than 10 years  
51  
52  
53 198 (adjusted OR, 1.48; 95% CI, 1.46 to 1.50). Regarding facility scale, with large-scale (500  
54  
55  
56 199 beds or more) hospital-based clinics as reference, free-standing clinics (adjusted OR,

1  
2  
3  
4  
5  
6  
7 200 4.24; 95% CI, 4.03 to 4.45), small-scale (< 200 beds) hospital-based clinics (adjusted OR,  
8  
9  
10 201 2.07; 95% CI, 1.97 to 2.18), and medium-scale (200–499 beds) hospital-based clinics  
11  
12  
13 202 (adjusted OR, 1.71; 95% CI, 1.62 to 1.80) were significantly associated with more  
14  
15  
16 203 frequent antibiotic prescription.

17  
18  
19  
20 204 Similar results were shown with the logistic regression analysis for gastrointestinal  
21  
22  
23 205 infections (Table 5). Male sex was associated with slightly more antibiotic prescription  
24  
25  
26 206 (adjusted OR, 1.04; 95% CI, 1.01 to 1.06) than the female sex. Patients aged 10 to 19  
27  
28  
29  
30 207 years (adjusted OR, 1.92; 95% CI, 1.83 to 2.00), 20 to 64 years (adjusted OR, 1.55; 95%  
31  
32  
33 208 CI, 1.51 to 1.60), and younger than 10 years (adjusted OR, 1.76; 95% CI, 1.71 to 1.82)  
34  
35  
36 209 received more antibiotic prescriptions compared with patients aged 65 years or older.

37  
38  
39  
40 210 With reference to large-scale ( $\geq$  500 beds) hospital-based clinics, free-standing clinics  
41  
42  
43 211 (adjusted OR, 1.88; 95% CI, 1.68 to 2.10) and small-scale (< 200 beds) hospital-based  
44  
45  
46 212 clinics (adjusted OR, 1.17; 95% CI, 1.04 to 1.32) were associated with frequent antibiotic  
47  
48  
49  
50 213 prescription for gastrointestinal infections.  
51  
52  
53  
54  
55  
56  
57  
58  
59  
60

1  
2  
3  
4  
5  
6  
7 **215 Discussion**  
8  
9

10 216 We described oral antibiotic prescription patterns in the outpatient care setting in Japan.  
11  
12  
13 217 To the best of our knowledge, this is the first Japanese study to comprehensively describe  
14  
15  
16 218 antibiotic prescription patterns linked to individual diagnoses data, using the claims  
17  
18  
19 219 database. Broad-spectrum antibiotics consisting of third-generation cephalosporins,  
20  
21  
22  
23 220 macrolides, and quinolones accounted for nearly 90% of antibiotic prescriptions in the  
24  
25  
26 221 primary care settings. Prescription of penicillin was only 5%. This prescription pattern is  
27  
28  
29 222 consistent with the results of an analysis of antibiotic sales data in Japan, in which 77%  
30  
31  
32  
33 223 of oral antibiotics shipped were broad-spectrum.<sup>7</sup> In contrast, the use of cephalosporins,  
34  
35  
36 224 macrolides, and quinolones in the United States of America (USA) and Europe were  
37  
38  
39 225 much lower than in Japan. Hicks *et al.*<sup>14</sup> analyzed the sales data of oral antibiotics in the  
40  
41  
42  
43 226 USA and showed that cephalosporins, macrolides, and quinolones accounted for 48% of  
44  
45  
46 227 the total oral antibiotics. In their study, penicillin had the largest share of the antibiotics  
47  
48  
49 228 (23%). Data from the European Surveillance of Antimicrobial Consumption project<sup>15</sup> also  
50  
51  
52  
53 229 showed that cephalosporins, macrolides, and quinolones accounted for about one third of  
54  
55  
56 230 the total oral antibiotic consumptions, in Europe. This study demonstrated a rather high  
57  
58  
59  
60

1  
2  
3  
4  
5  
6 231 ratio of broad-spectrum to narrow-spectrum oral antibiotics, in Japan; therefore, the  
7  
8  
9  
10 232 quality of antibiotic prescribing needs to be improved.  
11  
12

13 233 Although quinolones are not recommended for children, quinolones were prescribed as  
14  
15  
16 234 much as penicillins in children aged 0–9 years in our study. This may be because oral  
17  
18  
19  
20 235 fluoroquinolones such as tosufloxacin are approved for children to treat otitis media and  
21  
22  
23 236 pneumonia in Japan. Since the approval of quinolones in 2010, despite the  
24  
25  
26  
27 237 recommendation to prescribe quinolones carefully for children, many physicians  
28  
29  
30 238 prescribed tosufloxacin to children in expectation of clinical effectiveness.  
31  
32

33 239 Among antibiotics linked with individual diagnosis data, over 60% of antibiotics were  
34  
35  
36 240 prescribed for ARTIs, followed by gastrointestinal infections (9%), urinary tract  
37  
38  
39  
40 241 infections (8%), and skin, cutaneous, and mucosal infections (5%). Surprisingly, viral  
41  
42  
43 242 URI (common cold) was the most frequent infection associated with antibiotic  
44  
45  
46  
47 243 prescription. In the ambulatory care setting in the USA, antibiotics were prescribed most  
48  
49  
50 244 frequently for acute respiratory conditions (41–44%), followed by skin and mucosal  
51  
52  
53 245 conditions (15–19%), urinary tract infections (7–8%), and gastrointestinal conditions (5–  
54  
55  
56 246 6%).<sup>13,16</sup> Another study using primary care data in the United Kingdom (UK)<sup>17</sup>  
57  
58  
59  
60

1  
2  
3  
4  
5  
6  
7 247 demonstrated that 46% of antibiotics were prescribed for respiratory tract conditions,  
8  
9  
10 248 followed by urogenital tract (23%), and skin conditions (10%). Only 1% was prescribed  
11  
12  
13 249 for gastrointestinal conditions. Our study demonstrated a higher proportion of antibiotic  
14  
15  
16 250 prescription for ARTIs (approximately 15% higher than those in USA or UK) and  
17  
18  
19  
20 251 gastrointestinal infections (approximately 5% higher) in Japan.

23 252 Antibiotics were prescribed for 35% of viral URI cases and approximately 50–60% of  
24  
25  
26 253 pharyngitis, bronchitis, and sinusitis cases in our study. These prescription rates were  
27  
28  
29  
30 254 approximately similar to those of a USA study,<sup>13</sup> which showed a rate of 30% for viral  
31  
32  
33 255 URI, 62% for pharyngitis, 65% for bronchitis, and 72% for sinusitis. Medically,  
34  
35  
36 256 antibiotics are rarely indicated for ARTIs.<sup>18</sup> Antibiotics have no role in the treatment of  
37  
38  
39  
40 257 either viral URI (common cold) or the majority of acute bronchitis cases, which are  
41  
42  
43 258 generally caused by viral infection. Only a minority of patients with bronchitis (< 10%),  
44  
45  
46 259 for example patients who have underlying COPD or whooping cough, may derive any  
47  
48  
49  
50 260 benefit from antibiotic treatment. With pharyngitis, antibiotics are mainly indicated only  
51  
52  
53 261 for streptococcal pharyngitis, which accounts for 5–15% of pharyngitis in adults and 20–  
54  
55  
56 262 30% in children.<sup>19, 20</sup>

1  
2  
3  
4  
5  
6  
7 263 The antibiotic prescription rate for gastrointestinal infections was three times higher than  
8  
9  
10 264 the rate reported in the USA (30% vs. 10%).<sup>13</sup> As most acute gastroenteritis is self-  
11  
12  
13 265 limiting, the Japanese national guideline recommends the non-usage of antibiotics for  
14  
15  
16 266 gastroenteritis unless symptoms are severe.<sup>10</sup> Based on our study, approximately 70% of  
17  
18  
19  
20 267 oral antibiotics are prescribed for ARTIs or acute gastroenteritis; however, most (> 80%),  
21  
22  
23 268 did not require antibiotics. Therefore, there is a need for suitable targets to reduce  
24  
25  
26 269 unnecessary antibiotic use in accordance with antimicrobial stewardship program.  
27  
28  
29  
30 270 Previous studies from the UK<sup>21, 22</sup> analyzed reasons for antibiotic prescribing for sore  
31  
32  
33 271 throats and assessed that patient demand for antibiotics and physician pressure to meet  
34  
35  
36 272 patient demand are associated with antibiotic prescription. In addition, we suppose that  
37  
38  
39  
40 273 physicians frequently prescribe antibiotics for URI as prophylaxis for complicating  
41  
42  
43 274 secondary bacterial infections. Previous qualitative studies identified that additional  
44  
45  
46 275 factors associated with antibiotic prescription included diagnostic uncertainty,  
47  
48  
49  
50 276 unawareness of guidelines, time pressure at work, and patient expectations regarding  
51  
52  
53 277 antibiotics.<sup>23-25</sup>  
54  
55

56 278 As for antibiotic prescription for ARTIs and gastrointestinal infections, most  
57  
58  
59  
60



1  
2  
3  
4  
5  
6  
7 279 antibiotics prescribed were broad-spectrum. For example, quinolones accounted for 15–  
8  
9  
10 280 35% of the antibiotics prescribed for ARTIs in this study, although the proportion of  
11  
12  
13 281 quinolones to whole antibiotics prescribed for ARTIs should be <5% according to the  
14  
15  
16 282 ESAC disease-specific quality indicators.<sup>26</sup> Accordingly, the quality of antibiotic  
17  
18  
19  
20 283 prescribing should be improved.

21  
22  
23 284 The logistic regression analyses revealed several factors associated with antibiotic  
24  
25  
26 285 prescriptions for ARTIs and gastrointestinal infections. The smaller the facility scale, the  
27  
28  
29  
30 286 higher the odds of antibiotic prescribing. Recent studies from Japan<sup>8</sup> and Taiwan<sup>27</sup> have  
31  
32  
33 287 found similar results. As family practitioners, pediatricians, and internists usually  
34  
35  
36 288 prescribe a high number of antibiotic courses,<sup>14</sup> greater adherence to treatment guidelines  
37  
38  
39  
40 289 among physicians in these specialties is particularly important. It has also been reported  
41  
42  
43 290 that mid- or late-career stage physicians (because the effect of training received during  
44  
45  
46 291 medical education might have reduced, after this long time) were more likely to prescribe  
47  
48  
49  
50 292 antibiotics for nonbacterial acute URI.<sup>28</sup>

51  
52  
53 293 Patient age was another factor associated with antibiotic prescription. In this study,  
54  
55  
56 294 antibiotic prescription rates for ARTIs and gastrointestinal infections were highest in

1  
2  
3  
4  
5  
6  
7 295 patients aged 10–19 years, followed by patients aged 20–64 years (ARTIs) or 0–9 years  
8  
9  
10 296 (gastrointestinal infections). A previous study concerning Dutch primary care showed  
11  
12  
13 297 similar results of antibiotic over-prescribing for ARTIs in patients aged 31–65 years (i.e.,  
14  
15  
16 298 not in children or the elderly).<sup>29</sup> As adolescents and young adults generally pose a much  
17  
18  
19  
20 299 lower risk of disease complications than young children or elderly individuals,  
21  
22  
23 300 antimicrobial stewardship should focus on these age groups of patients. In this study,  
24  
25  
26 301 male sex was also associated with increased antibiotic prescribing. Although a patient sex  
27  
28  
29  
30 302 difference was observed in another study, the results differed; female patients were more  
31  
32  
33 303 likely to have high prescribing in the USA.<sup>14</sup> The reason for patient age and sex difference  
34  
35  
36 304 in antibiotic prescribing remains to be clarified. Patient sex and age-standardized  
37  
38  
39  
40 305 antibiotic prescription rates need to be assessed in Japan for effective intervention.

41  
42  
43 306 Our study has several limitations. First, our results do not represent the entire antibiotic  
44  
45  
46 307 prescription pattern in Japan because the claims database used in this study was composed  
47  
48  
49  
50 308 of claims in only one prefecture. Geographical diversity in antibiotic prescribing may be  
51  
52  
53 309 present, as observed in the previous study from the USA.<sup>14</sup> Second, since we used an  
54  
55  
56 310 administrative claims database; the accuracy of the diagnosis was not validated. In

1  
2  
3  
4  
5  
6  
7 311 addition, we could not link diagnosis and antibiotic prescriptions on a one-to-one level  
8  
9  
10 312 when patients had multiple infectious diagnoses. Third, there may be other potential  
11  
12  
13 313 confounding factors that were not included in this study. For example, information on  
14  
15  
16 314 out-of-hours visits,<sup>8</sup> non-specialty physicians,<sup>8, 27, 30</sup> and patient's low-per capita income  
17  
18  
19  
20 315 or low-education,<sup>14</sup> which have been reported as potential factors associated with  
21  
22  
23 316 inappropriate antibiotics prescribing, could not be extracted from the claims database in  
24  
25  
26 317 this study. Fourth, only 65% of antibiotic prescriptions were linked to infectious disease  
27  
28  
29  
30 318 visits. This may be partly because we could not capture the information concerning  
31  
32  
33 319 follow-up visits when patients had multiple visits for a single infection (antibiotics were  
34  
35  
36 320 linked to the infectious diagnoses only when they were prescribed at the first visit of an  
37  
38  
39  
40 321 illness episode). In addition, approximately 3–5% of medical claims that included  
41  
42  
43 322 diagnostic codes and 0.1% of pharmacy claims that included prescription (medication)  
44  
45  
46 323 codes were registered in non-digital format. As non-digital insurance claims were not  
47  
48  
49  
50 324 included in our database, 3–5% of antibiotic prescriptions were not linked to diagnoses.  
51  
52  
53 325 Therefore, inappropriate antibiotic prescription might be underestimated rather than  
54  
55  
56 326 overestimated.

1  
2  
3  
4  
5  
6  
7 327 In conclusion, this Japanese study demonstrated that third-generation cephalosporins,  
8  
9  
10 328 macrolides, and quinolones accounted for 88% of oral antibiotic prescription.  
11  
12  
13 329 Approximately 60% of antibiotic prescription was provided for ARTIs, with viral URI  
14  
15  
16 330 and pharyngitis being the two ARTI diagnoses with the largest antibiotic prescriptions.  
17  
18  
19  
20 331 Gastrointestinal infections were the second most common diagnosis for antibiotic  
21  
22  
23 332 prescribing. The scale of the facilities (clinic or small-scale hospital) and patient age  
24  
25  
26 333 (adolescents and young adults) were factors associated with antibiotic over-prescription.  
27  
28  
29  
30 334 Antimicrobial stewardship interventions should focus on targeting antibiotic prescribing  
31  
32  
33 335 for these infectious diagnoses, patients, and institutions. Further nationwide studies are  
34  
35  
36 336 needed to support our data, and longitudinal studies using medical claims data are needed  
37  
38  
39  
40 337 to evaluate the effectiveness of antimicrobial stewardship.  
41  
42  
43  
44  
45  
46  
47  
48  
49  
50  
51  
52  
53  
54  
55  
56  
57  
58  
59  
60

1  
2  
3  
4  
5  
6  
7 **338 Authors' contributions**  
8

9  
10 339 HH and SH conceived the study, interpreted the data and results, and drafted the  
11  
12  
13 340 manuscript. HH, HM, YS, and HY collected, organized, analyzed the data, and  
14  
15  
16 341 performed statistical analyses. KK and RN conceived the study and collected and  
17  
18  
19 342 interpreted the data. All authors critically revised the manuscript for intellectual content.  
20  
21  
22  
23 343 All authors read and approved the final manuscript.  
24  
25  
26  
27  
28  
29

30 **345 Funding**  
31

32  
33 346 This work was funded by ImPACT Program of Council for Science, Technology, and  
34  
35  
36 347 Innovation (Cabinet Office, Government of Japan) and by MEXT KAKENHI, Grant  
37  
38  
39  
40 348 Number 16K09254.  
41  
42

43 349  
44  
45

46 **350 Competing interests**  
47

48  
49 351 None declared.  
50  
51

52  
53 352  
54  
55

56 **353 Data sharing**  
57  
58  
59  
60

1  
2  
3  
4  
5  
6  
7 354 No additional data available.  
8  
9

10 355  
11  
12

13 356 **Transparency declarations**  
14  
15

16 357 The lead author (the manuscript's guarantor) affirms that the manuscript is an honest,  
17  
18  
19  
20 358 accurate, and transparent account of the study reported; that no important aspects of the  
21  
22  
23 359 study have been omitted; and that any discrepancies from the study as planned have been  
24  
25  
26 360 explained.  
27  
28

29  
30 361  
31  
32

33 362 **Ethical approval**  
34  
35

36 363 This study was approved by the Ethics Committee of the Jichi Medical University  
37  
38  
39  
40 364 (Number 17-002).  
41  
42  
43  
44  
45  
46  
47  
48  
49  
50  
51  
52  
53  
54  
55  
56  
57  
58  
59  
60

365 **Table 1.** Frequency of oral antibiotic prescriptions by age and antibiotic groups

366

| Antibiotic groups<br>coded by ATC* classification** | Number (%) of visits with antibiotic prescription |               |               |                |                |
|-----------------------------------------------------|---------------------------------------------------|---------------|---------------|----------------|----------------|
|                                                     | Age Group, y                                      |               |               |                |                |
|                                                     | 0–9                                               | 10–19         | 20–64         | ≥ 65           | All ages       |
| Penicillins                                         | 7,495 (7.2)                                       | 1,724 (4.2)   | 8,574 (4.5)   | 14,924 (4.3)   | 32,717 (4.8)   |
| First/second-generation cephalosporins              | 964 (0.9)                                         | 411 (1.0)     | 2,987 (1.6)   | 5,719 (1.6)    | 10,081 (1.5)   |
| Third-generation cephalosporins                     | 52,082 (49.9)                                     | 16,367 (40.1) | 60,621 (31.8) | 108,302 (31.2) | 237,372 (34.8) |
| Macrolides                                          | 28,597 (27.4)                                     | 14,691 (36.0) | 56,719 (29.7) | 115,649 (33.3) | 215,656 (31.6) |
| Quinolones                                          | 7,286 (7.0)                                       | 4,158 (10.2)  | 48,843 (25.6) | 84,848 (24.4)  | 145,135 (21.3) |
| Sulfonamides and trimethoprim                       | 32 (0.0)                                          | 53 (0.1)      | 1,389 (0.7)   | 4,520 (1.3)    | 5,994 (0.9)    |
| Tetracyclines                                       | 915 (0.9)                                         | 1,366 (3.3)   | 4,366 (2.3)   | 5,147 (1.5)    | 11,794 (1.7)   |
| Other antibiotics                                   | 6,901 (6.6)                                       | 2,021 (5.0)   | 7,186 (3.8)   | 7,965 (2.3)    | 24,073 (3.5)   |
| All antibiotics                                     | 104,272                                           | 40,791        | 190,685       | 347,074        | 682,822        |

367 \*ATC: Anatomical Therapeutic Chemical

368 \*\*Penicillins, J01C; First-generation cephalosporins, J01DB; Second-generation cephalosporins, J01DC; Third-generation cephalosporins, J01DD;

369 Macrolides, J01FA; Quinolones, J01M; Sulfonamides and trimethoprim, J01E; Tetracyclines, J01A; Other antibiotics, J01B, J01DH, J01DI, J01FF,

370 J01G, and J01X

371 **Table 2.** Frequency of oral antibiotic prescriptions by facility scale and antibiotic group\*

372

| Antibiotic groups<br>coded by ATC** classification*** | Number (%) of visits with antibiotic prescription |                                                         |                                                            |                                                            | All facilities |
|-------------------------------------------------------|---------------------------------------------------|---------------------------------------------------------|------------------------------------------------------------|------------------------------------------------------------|----------------|
|                                                       | Free-standing clinic                              | Small-scale hospital<br>( $< 200$ beds)-based<br>clinic | Medium-scale<br>hospital (200–499<br>beds)-based<br>clinic | Large-scale hospital<br>( $\geq 500$ beds)-based<br>clinic |                |
| Penicillins                                           | 25,225 (4.8)                                      | 3,453 (4.4)                                             | 2,968 (6.6)                                                | 565 (3.9)                                                  | 32,211 (4.8)   |
| First/second-generation cephalosporins                | 6,755 (1.3)                                       | 1,789 (2.3)                                             | 1,245 (2.8)                                                | 158 (1.1)                                                  | 9947 (1.5)     |
| Third-generation cephalosporins                       | 187,928 (35.4)                                    | 25,463 (32.4)                                           | 15,252 (33.7)                                              | 4,139 (28.8)                                               | 232,782 (34.8) |
| Macrolides                                            | 169,980 (32.0)                                    | 26,307 (33.5)                                           | 11,319 (25.0)                                              | 3,833 (26.7)                                               | 211,439 (31.6) |
| Quinolones                                            | 110,770 (20.9)                                    | 17,877 (22.8)                                           | 9,992 (22.1)                                               | 3,402 (23.7)                                               | 142,041 (21.2) |
| Sulfonamides and trimethoprim                         | 712 (0.1)                                         | 1,069 (1.4)                                             | 2,234 (4.9)                                                | 1,618 (11.3)                                               | 5,633 (0.8)    |
| Tetracyclines                                         | 9,477 (1.8)                                       | 846 (1.1)                                               | 803 (1.8)                                                  | 320 (2.2)                                                  | 11,446 (1.7)   |
| Other antibiotics                                     | 20,069 (3.8)                                      | 1,742 (2.2)                                             | 1,458 (3.2)                                                | 318 (2.2)                                                  | 23,587 (3.5)   |
| All antibiotics                                       | 530,916                                           | 78,546                                                  | 45,271                                                     | 14,353                                                     | 669,086        |

373 \*13,736 patients with antibiotic prescription were excluded due to missing data about facility scale.

374 \*\*ATC: Anatomical Therapeutic Chemical

375 \*\*\*Penicillins, J01C; First-generation cephalosporins, J01DB; Second-generation cephalosporins, J01DC; Third-generation cephalosporins, J01DD;

376 Macrolides, J01FA; Quinolones, J01M; Sulfonamides and trimethoprim, J01E; Tetracyclines, J01A; Other antibiotics, J01B, J01DH, J01DI, J01FF,

377 J01G, and J01X



378 **Table 3.** Frequency of oral antibiotic prescriptions by antibiotic groups and diagnoses

379

| Diagnoses                          | All visits | Visits with any antibiotic prescription and prescription rate (%) | Number (%) of visits with antibiotic prescriptions by antibiotic groups* |                                         |                        |              |               |           |                |                   |
|------------------------------------|------------|-------------------------------------------------------------------|--------------------------------------------------------------------------|-----------------------------------------|------------------------|--------------|---------------|-----------|----------------|-------------------|
|                                    |            |                                                                   | Penicillins                                                              | 1 <sup>st</sup> /2 <sup>nd</sup> cephem | 3 <sup>rd</sup> cephem | Macrolide s  | Quinolone s   | ST        | Tetracyclin es | Other antibiotics |
| Miscellaneous bacterial infections | 45,061     | 20,429 (45.3)                                                     | 2,969 (11.5)                                                             | 468 (1.8)                               | 7,404 (28.7)           | 7,868 (30.5) | 5,731 (22.2)  | 181 (0.7) | 444 (1.7)      | 728 (2.8)         |
| STD                                | 14,051     | 3,931 (28.0)                                                      | 86 (1.9)                                                                 | 76 (1.7)                                | 836 (18.9)             | 1515 (34.2)  | 496 (11.2)    | 14 (0.3)  | 147 (3.3)      | 1,260 (28.4)      |
| Bacterial Pneumonia                | 47,035     | 21,473 (45.7)                                                     | 916 (3.4)                                                                | 121 (0.5)                               | 5,044 (18.9)           | 8,568 (32.2) | 11,236 (42.2) | 191 (0.7) | 238 (0.9)      | 316 (1.2)         |
| Abdominal infection                | 9,208      | 2,077 (22.6)                                                      | 69 (3.2)                                                                 | 29 (1.3)                                | 680 (31.1)             | 142 (6.5)    | 1,086 (49.7)  | ≤ 10      | ≤ 10           | 177 (8.1)         |
| Orthopedic infection               | 1,749      | 380 (21.7)                                                        | 36 (8.2)                                                                 | 22 (5.0)                                | 225 (51.4)             | 21 (4.8)     | 93 (21.2)     | ≤ 10      | 19 (4.3)       | 22 (5.0)          |
| Urinary tract infections           | 97,948     | 37,674 (38.5)                                                     | 1,195 (2.9)                                                              | 567 (1.4)                               | 14,735 (36.0)          | 1,998 (4.9)  | 20,229 (49.5) | 429 (1.0) | 521 (1.3)      | 1,232 (3.0)       |
| PID                                | 11,621     | 1,763 (15.2)                                                      | 84 (4.6)                                                                 | 26 (1.4)                                | 1127 (61.1)            | 164 (8.9)    | 167 (9.1)     | ≤ 10      | ≤ 10           | 273 (14.8)        |

28

|                             |         |               |              |             |               |               |               |           |              |              |  |
|-----------------------------|---------|---------------|--------------|-------------|---------------|---------------|---------------|-----------|--------------|--------------|--|
|                             |         |               |              |             |               | 2)            |               |           |              |              |  |
| GI infections               | 137,661 | 41,309 (30.0) | 2,121 (4.6)  | 264 (0.6)   | 12,060 (26.0) | 8603 (18.6)   | 13206 (28.5)  | 196 (0.4) | 232 (0.5)    | 9,680 (20.9) |  |
| Skin infections             | 62,202  | 23,572 (37.9) | 1,167 (4.6)  | 1,337 (5.3) | 15,311 (60.6) | 1,975 (7.8)   | 2,848 (11.3)  | 25 (0.1)  | 997 (3.9)    | 1,615 (6.4)  |  |
| Suppurative otitis media    | 16,059  | 9,958 (62.0)  | 1,566 (11.8) | 18 (0.1)    | 5,213 (39.1)  | 1,972 (14.8)  | 3,654 (27.4)  | ≤ 10      | 92 (0.7)     | 812 (6.1)    |  |
| Pharyngitis                 | 146,508 | 78,469 (53.6) | 4,372 (5.1)  | 450 (0.5)   | 35,958 (41.8) | 27,454 (31.9) | 16,387 (19.1) | 121 (0.1) | 301 (0.3)    | 976 (1.1)    |  |
| Sinusitis                   | 80,078  | 45,456 (56.8) | 3,654 (6.9)  | 481 (0.9)   | 15,282 (28.8) | 20,677 (39.0) | 11,441 (21.6) | ≤ 10      | 779 (1.5)    | 766 (1.4)    |  |
| Bronchitis with COPD        | 6,832   | 4,313 (63.1)  | 208 (4.1)    | 14 (0.3)    | 912 (17.8)    | 2,178 (42.5)  | 1,762 (34.3)  | 28 (0.5)  | 11 (0.2)     | 17 (0.3)     |  |
| Acne                        | 6,939   | 2,030 (29.3)  | ≤ 10         | 32 (1.5)    | 174 (8.3)     | 739 (35.2)    | 41 (2.0)      | ≤ 10      | 1,050 (50.0) | 62 (3.0)     |  |
| Nonbacterial GI infections  | 1,215   | 116 (9.5)     | ≤ 10         | ≤ 10        | 42 (33.1)     | 38 (29.9)     | 33 (26.0)     | ≤ 10      | ≤ 10         | 14 (11.0)    |  |
| Nonsuppurative otitis media | 2,807   | 888 (31.6)    | 63 (5.8)     | ≤ 10        | 384 (35.5)    | 481 (44.5)    | 128 (11.8)    | ≤ 10      | ≤ 10         | 26 (2.4)     |  |
| Viral URI                   | 274,441 | 96,989 (35.3) | 4,839 (4.6)  | 825 (0.8)   | 44,475 (44.4) | 37,001 (37.0) | 16,941 (16.9) | 160 (0.2) | 790 (0.7)    | 601 (0.6)    |  |

|                         |        |               |             |           |               |               |               |          |           |           |
|-------------------------|--------|---------------|-------------|-----------|---------------|---------------|---------------|----------|-----------|-----------|
|                         |        |               |             |           | 2.1)          | 5.0)          | 6.0)          |          |           |           |
| Influenza               | 22,868 | 8,665 (37.9)  | 296 (3.1)   | 74 (0.8)  | 3,030 (31.9)  | 3,934 (41.5)  | 2,040 (21.5)  | ≤ 10     | 47 (0.5)  | 69 (0.7)  |
| Viral pneumonia         | 15     | ≤ 10          | ≤ 10        | ≤ 10      | ≤ 10          | ≤ 10          | ≤ 10          | ≤ 10     | ≤ 10      | ≤ 10      |
| Bronchitis without COPD | 89,479 | 47,248 (52.8) | 1,509 (3.0) | 332 (0.7) | 14,521 (28.5) | 22,779 (44.8) | 11,078 (21.8) | 58 (0.1) | 250 (0.5) | 346 (0.7) |
| Noninfectious diarrhea  | 1,597  | 50 (3.1)      | ≤ 10        | ≤ 10      | ≤ 10          | 19 (55.9)     | 15 (44.1)     | ≤ 10     | ≤ 10      | ≤ 10      |
| Fever                   | 2,908  | 438 (15.1)    | 20 (4.3)    | ≤ 10      | 190 (40.5)    | 103 (22.0)    | 156 (33.3)    | ≤ 10     | ≤ 10      | ≤ 10      |

380 1<sup>st</sup>/2<sup>nd</sup> cephem, first/second-generation cephalosporins; 3<sup>rd</sup> cephem, third-generation cephalosporins; ST, Sulfonamides and trimethoprim; STD,  
 381 sexual transmitted diseases; PID, pelvic inflammatory diseases; GI infections, gastrointestinal infections; Skin infections, Skin, cutaneous and  
 382 mucosal infections; COPD, chronic obstructive pulmonary disease; URI, upper respiratory infections  
 383 \*Antibiotics were coded according to Anatomical Therapeutic Chemical (ATC) codes: Penicillins, J01C; First-generation cephalosporins, J01DB;  
 384 Second-generation cephalosporins, J01DC; Third-generation cephalosporins, J01DD; Macrolides, J01FA; Quinolones, J01M; Sulfonamides and  
 385 trimethoprim, J01E; Tetracyclines, J01A; Other antibiotics, J01B, J01DH, J01DI, J01FF, J01G, and J01X

386

387 **Table 4.** Factors associated with antibiotic prescription for acute upper respiratory infections\*

388

| Characteristics                      | Antibiotic prescription, n (%) | Unadjusted odds ratio (95% CI) | Adjusted odds ratio (95% CI) |
|--------------------------------------|--------------------------------|--------------------------------|------------------------------|
| <b>Patient age</b>                   |                                |                                |                              |
| 0–9                                  | 44,413 (50.4)                  | 1.66 (1.64 to 1.69)            | 1.48 (1.46 to 1.50)          |
| 10–19                                | 20,822 (65.1)                  | 3.08 (3.00 to 3.15)            | 2.75 (2.69 to 2.82)          |
| 20–64                                | 85,952 (54.6)                  | 1.98 (1.95 to 2.00)            | 1.92 (1.89 to 1.94)          |
| ≥ 65                                 | 121,289 (37.9)                 | 1                              | 1                            |
| <b>Patient sex</b>                   |                                |                                |                              |
| Male                                 | 112,643 (47.4)                 | 1.13 (1.12 to 1.14)            | 1.10 (1.08 to 1.11)          |
| Female                               | 155,038 (44.4)                 | 1                              | 1                            |
| <b>Facility scale</b>                |                                |                                |                              |
| Free-standing clinic                 | 233,078 (49.8)                 | 4.48 (4.27 to 4.70)            | 4.24 (4.03 to 4.45)          |
| Hospital (< 200 beds)-based clinic   | 23,012 (30.8)                  | 2.01 (1.91 to 2.11)            | 2.07 (1.97 to 2.18)          |
| Hospital (200–499 beds)-based clinic | 9,327 (28.2)                   | 1.77 (1.68 to 1.89)            | 1.71 (1.62 to 1.80)          |
| Hospital (≥ 500 beds)-based clinic   | 2,064 (18.2)                   | 1                              | 1                            |

389 CI, confidence interval

390 \*Acute upper respiratory infections include viral upper respiratory infections, pharyngitis, bronchitis, and sinusitis.

391 **Table 5.** Factors associated with antibiotic prescription for gastrointestinal infections

392

| Characteristics                      | Antibiotic prescription, n (%) | Unadjusted odds ratio (95% CI) | Adjusted odds ratio (95% CI) |
|--------------------------------------|--------------------------------|--------------------------------|------------------------------|
| <b>Patient age</b>                   |                                |                                |                              |
| 0–9                                  | 10,809 (37.0)                  | 1.92 (1.86 to 1.98)            | 1.76 (1.71 to 1.82)          |
| 10–19                                | 4,395 (38.7)                   | 2.07 (1.98 to 2.16)            | 1.92 (1.83 to 2.00)          |
| 20–64                                | 12,310 (32.4)                  | 1.57 (1.53 to 1.61)            | 1.55 (1.51 to 1.60)          |
| ≥ 65                                 | 13,795 (23.4)                  | 1                              | 1                            |
| <b>Patient sex</b>                   |                                |                                |                              |
| Male                                 | 18,547 (30.9)                  | 1.09 (1.06 to 1.12)            | 1.04 (1.01 to 1.06)          |
| Female                               | 21,831 (29.1)                  | 1                              | 1                            |
| <b>Facility type</b>                 |                                |                                |                              |
| Free-standing clinic                 | 33,712 (32.9)                  | 2.03 (1.82 to 2.27)            | 1.88 (1.68 to 2.10)          |
| Hospital (< 200 beds)-based clinic   | 4,056 (21.7)                   | 1.15 (1.02 to 1.29)            | 1.17 (1.04 to 1.32)          |
| Hospital (200–499 beds)-based clinic | 2,214 (18.9)                   | 0.97 (0.86 to 1.09)            | 0.93 (0.82 to 1.05)          |
| Hospital (≥ 500 beds)-based clinic   | 396 (19.4)                     | 1                              | 1                            |

393 CI, confidence interval

394 **References**

- 395 1. de Kraker ME, Wolkewitz M, Davey PG et al. Clinical impact of antimicrobial  
396 resistance in European hospitals: excess mortality and length of hospital stay related to  
397 methicillin-resistant *Staphylococcus aureus* bloodstream infections. *Antimicrob Agents*  
398 *Chemother* 2011; 55: 1598-605.
- 399 2. Stewardson AJ, Allignol A, Beyersmann J et al. The health and economic burden of  
400 bloodstream infections caused by antimicrobial-susceptible and non-susceptible  
401 Enterobacteriaceae and *Staphylococcus aureus* in European hospitals, 2010 and 2011: a  
402 multicentre retrospective cohort study. *Euro Surveill* 2016; 21: pii=30319.
- 403 3. Ammerlaan HS, Harbarth S, Buiting AG et al. Secular trends in nosocomial  
404 bloodstream infections: antibiotic-resistant bacteria increase the total burden of infection.  
405 *Clin Infect Dis* 2013; 56: 798-805.
- 406 4. World Health Organization. Global action plan on antimicrobial resistance. Available  
407 at: [http://apps.who.int/iris/bitstream/10665/193736/1/9789241509763\\_eng.pdf?ua=1](http://apps.who.int/iris/bitstream/10665/193736/1/9789241509763_eng.pdf?ua=1)  
408 (Accessed: August 3, 2018).
- 409 5. The Government of Japan. National Action Plan on Antimicrobial Resistance (AMR)

- 1  
2  
3  
4  
5  
6  
7 410 2016-2020. Available at: <https://www.mhlw.go.jp/file/06-Seisakujouhou-10900000->  
8  
9  
10 411 [Kenkoukyoku/0000138942.pdf](https://www.mhlw.go.jp/file/06-Seisakujouhou-10900000-Kenkoukyoku/0000138942.pdf). (Accessed: August 3, 2018).  
11  
12  
13 412 6. Tacconelli E. Antimicrobial use: risk driver of multidrug resistant microorganisms in  
14  
15  
16 413 healthcare settings. *Curr Opin Infect Dis* 2009; 22: 352-8.  
17  
18  
19  
20 414 7. Muraki Y, Yagi T, Tsuji Y et al. Japanese antimicrobial consumption surveillance:  
21  
22  
23 415 First report on oral and parenteral antimicrobial consumption in Japan (2009-2013). *J*  
24  
25  
26 416 *Glob Antimicrob Resist* 2016; 7: 19-23.  
27  
28  
29  
30 417 8. Yoshida S, Takeuchi M, Kawakami K. Prescription of antibiotics to pre-school  
31  
32  
33 418 children from 2005 to 2014 in Japan: a retrospective claims database study. *J Public*  
34  
35  
36 419 *Health (Oxf)* 2018; 40: 397-403.  
37  
38  
39  
40 420 9. Higashi T, Fukuhara S. Antibiotic prescriptions for upper respiratory tract infection in  
41  
42  
43 421 Japan. *Intern Med* 2009; 48: 1369-75.  
44  
45  
46 422 10. The Government of Japan, Ministry of Health, Labour and Welfare. Manual  
47  
48  
49 423 of Antimicrobial Stewardship (1st Edition). Available at: <http://www.mhlw.go.jp/fil>  
50  
51  
52 424 [e/06-Seisakujouhou-10900000-Kenkoukyoku/0000193504.pdf](http://www.mhlw.go.jp/file/06-Seisakujouhou-10900000-Kenkoukyoku/0000193504.pdf). (Accessed: August 3,  
53  
54  
55 425 2018).  
56  
57  
58  
59  
60

- 1  
2  
3  
4  
5  
6  
7 426 11. Kumamoto prefectural government. 2012 Kumamoto National Health Insuranc  
8  
9  
10 427 e business situation report. Available at: <http://www.pref.kumamoto.jp.e.qp.hp.trans>  
11  
12  
13 428 er.com/kiji\_2735.html (Accessed: August 3, 2018).  
14  
15  
16 429 12. Kumamoto prefectural government. The situation such as Kumamoto elderly  
17  
18  
19 430 aged 75 or over medical expenses. Available at: <http://www.pref.kumamoto.jp.e.qp.h>  
20  
21  
22  
23 431 p.transer.com/kiji\_13777.html (Accessed: August 3, 2018).  
24  
25  
26 432 13. Fleming-Dutra KE, Hersh AL, Shapiro DJ et al. Prevalence of Inappropriate  
27  
28  
29 433 Antibiotic Prescriptions Among US Ambulatory Care Visits, 2010-2011. JAMA 2016;  
30  
31  
32  
33 434 315: 1864-73.  
34  
35  
36 435 14. Hicks LA, Bartoces MG, Roberts RM et al. US outpatient antibiotic prescribing  
37  
38  
39 436 variation according to geography, patient population, and provider specialty in 2011. Clin  
40  
41  
42  
43 437 Infect Dis 2015; 60: 1308-16.  
44  
45  
46 438 15. ESAC-Net surveillance data. Surveillance of antimicrobial consumption in Europe.  
47  
48  
49 439 Available at: <http://ecdc.europa.eu/en/publications/Publications/antimicrobial->  
50  
51  
52  
53 440 consumption-europe-esac-net-2012.pdf (Accessed: August 3, 2018).  
54  
55  
56 441 16. Shapiro DJ, Hicks LA, Pavia AT et al. Antibiotic prescribing for adults in ambulatory  
57  
58  
59  
60



- 1  
2  
3  
4  
5  
6  
7 442 care in the USA, 2007-09. *J Antimicrob Chemother* 2014; 69: 234-40.  
8  
9  
10 443 17. Dolk FCK, Pouwels KB, Smith DRM et al. Antibiotics in primary care in England:  
11  
12  
13 444 which antibiotics are prescribed and for which conditions? *J Antimicrob Chemother*  
14  
15  
16 445 2018; 73: ii2-ii10.  
17  
18  
19 446 18. Harris AM, Hicks LA, Qaseem A. Appropriate Antibiotic Use for Acute Respiratory  
20  
21  
22  
23 447 Tract Infection in Adults: Advice for High-Value Care From the American College of  
24  
25  
26 448 Physicians and the Centers for Disease Control and Prevention. *Ann Intern Med* 2016;  
27  
28  
29 449 164: 425-34.  
30  
31  
32  
33 450 19. Bisno AL. Acute pharyngitis: etiology and diagnosis. *Pediatrics* 1996; 97: 949-54.  
34  
35  
36 451 20. Ebell MH, Smith MA, Barry HC et al. The rational clinical examination. Does this  
37  
38  
39 452 patient have strep throat? *JAMA* 2000; 284: 2912-8.  
40  
41  
42  
43 453 21. Butler CC, Rollnick S, Pill R et al. Understanding the culture of prescribing:  
44  
45  
46 454 qualitative study of general practitioners' and patients' perceptions of antibiotics for sore  
47  
48  
49 455 throats. *BMJ* 1998; 317: 637-42.  
50  
51  
52  
53 456 22. Kumar S, Little P, Britten N. Why do general practitioners prescribe antibiotics for  
54  
55  
56 457 sore throat? Grounded theory interview study. *BMJ* 2003; 326: 138.  
57  
58  
59  
60

- 1  
2  
3  
4  
5  
6  
7 458 23. Brookes-Howell L, Hood K, Cooper L et al. Understanding variation in primary  
8  
9  
10 459 medical care: a nine-country qualitative study of clinicians' accounts of the non-clinical  
11  
12  
13 460 factors that shape antibiotic prescribing decisions for lower respiratory tract infection.  
14  
15  
16 461 BMJ Open. 2012; 2: e000796.  
17  
18  
19  
20 462 24. Tonkin-Crine S, Yardley L, Little P. Antibiotic prescribing for acute respiratory tract  
21  
22  
23 463 infections in primary care: a systematic review and meta-ethnography. J Antimicrob  
24  
25  
26 464 Chemother. 2011; 66: 2215-23.  
27  
28  
29  
30 465 25. O'Connor R, O'Doherty J, O'Regan A et al. Antibiotic use for acute respiratory tract  
31  
32  
33 466 infections (ARTI) in primary care; what factors affect prescribing and why is it  
34  
35  
36 467 important? A narrative review. Ir J Med Sci. 2018; 187: 969-86.  
37  
38  
39  
40 468 26. Adriaenssens N, Coenen S, Tonkin-Crine S, et al. European Surveillance of  
41  
42  
43 469 Antimicrobial Consumption (ESAC): disease-specific quality indicators for outpatient  
44  
45  
46 470 antibiotic prescribing. BMJ Qual Saf 2011; 20: 764-72.  
47  
48  
49  
50 471 27. Lee ML, Cho CY, Hsu CL, et al. Recent trends in antibiotic prescriptions for acute  
51  
52  
53 472 respiratory tract infections in pediatric ambulatory care in Taiwan, 2000-2009: A  
54  
55  
56 473 nationwide population-based study. J Microbiol Immunol Infect 2016; 49: 554-60.  
57  
58  
59  
60

- 1  
2  
3  
4  
5  
6  
7 474 28. Silverman M, Povitz M, Sontrop JM, et al. Antibiotic Prescribing for Nonbacterial  
8  
9  
10 475 Acute Upper Respiratory Infections in Elderly Persons. *Ann Intern Med* 2017; 166: 765-  
11  
12  
13 476 74.  
14  
15  
16 477 29. Akkerman AE, van der Wouden JC, Kuyvenhoven MM et al. Antibiotic prescribing  
17  
18  
19 478 for respiratory tract infections in Dutch primary care in relation to patient age and clinical  
20  
21  
22  
23 479 entities. *J Antimicrob Chemother* 2004; 54: 1116-21.  
24  
25  
26 480 30. Schmidt ML, Spencer MD, Davidson LE. Patient, Provider, and Practice  
27  
28  
29 481 Characteristics Associated with Inappropriate Antimicrobial Prescribing in Ambulatory  
30  
31  
32  
33 482 Practices. *Infect Control Hosp Epidemiol*. 2018; 39: 307-15.  
34  
35  
36  
37  
38  
39  
40  
41  
42  
43  
44  
45  
46  
47  
48  
49  
50  
51  
52  
53  
54  
55  
56  
57  
58  
59  
60

1 **Table S1.** Classification of infections by groups with corresponding ICD-10 codes  
 2

|                                                                        | Diagnosis                          | ICD-10 codes                                                                                                                                                                                                                                                                                                                                                                                                                                                                                                                                                                                                                                                            |
|------------------------------------------------------------------------|------------------------------------|-------------------------------------------------------------------------------------------------------------------------------------------------------------------------------------------------------------------------------------------------------------------------------------------------------------------------------------------------------------------------------------------------------------------------------------------------------------------------------------------------------------------------------------------------------------------------------------------------------------------------------------------------------------------------|
| <b>Group 1: Infections for which antibiotics are usually indicated</b> |                                    |                                                                                                                                                                                                                                                                                                                                                                                                                                                                                                                                                                                                                                                                         |
| 1                                                                      | Miscellaneous bacterial infections | Tuberculosis (A15–A19); Certain zoonotic bacterial diseases (A20–A28); Other bacterial diseases including listeriosis, diphtheria, bartonellosis, erysipelas, and rickettsioses (A30–A37, A39–A49, A75–A79); Bacterial meningitis, encephalitis, and intracranial abscess (G00, G042, G049, G06); Mastoiditis (H70); Infective endocarditis (I33, T826); Acute epiglottitis (J051); Deep neck space infections (J36, J390, J391); Abscess of lung and mediastinum; Pyothorax (J85, J86); Infections of the jaws and mouth (K102, K122); Infections due to cardiac and vascular devices (T827); Infection due to internal prosthetic devices, implants and grafts (T857) |
| 2                                                                      | Sexually transmitted infections    | Infections with a predominantly sexual mode of transmission (A50–A64); Other spirochetal diseases (A65–A69); Other diseases caused by chlamydia (A70–A74)                                                                                                                                                                                                                                                                                                                                                                                                                                                                                                               |
| 3                                                                      | Pneumonia                          | Bacterial pneumonia (J13–J18)                                                                                                                                                                                                                                                                                                                                                                                                                                                                                                                                                                                                                                           |
| 4                                                                      | Abdominal infections               | Acute appendicitis (K35); Abscess of anal and rectal regions, intestine, and liver (K61, K630, K750); Peritonitis (K65); Cholecystitis and cholangitis (K800, K801, K803, K804, K810, K819, K830)                                                                                                                                                                                                                                                                                                                                                                                                                                                                       |
| 5                                                                      | Orthopedic infections              | Pyogenic arthritis and prosthetic joint infection (M00, T845); necrotizing fasciitis (M726); Infective myositis, synovitis and bursitis (M600, M650–M651, M710–M711); Osteomyelitis (M462–M465, M86)                                                                                                                                                                                                                                                                                                                                                                                                                                                                    |
| 6                                                                      | Urinary tract infections           | Acute pyelonephritis/pyonephrosis ((N10, N12, N136); Renal abscess (N151); Kidney infection, unspecified (N159); Acute cystitis (N300); Cystitis, unspecified (N308, N309); Urethritis and urethral abscess (N34); Urinary tract infections, unspecified (N390); Prostatitis and abscess of prostate (N41); Orchitis and epididymitis (N45); Catheter                                                                                                                                                                                                                                                                                                                   |

|                                                                             |                                          |                                                                                                                                                                                                                                                                                                     |
|-----------------------------------------------------------------------------|------------------------------------------|-----------------------------------------------------------------------------------------------------------------------------------------------------------------------------------------------------------------------------------------------------------------------------------------------------|
|                                                                             |                                          | associated urinary tract infections (T835)                                                                                                                                                                                                                                                          |
| 7                                                                           | Pelvic inflammatory diseases             | Pelvic inflammatory diseases (N70–N73, N751, N760–N764); Infections of genitourinary tract in pregnancy (O23)                                                                                                                                                                                       |
| <b>Group 2 : Infections for which antibiotics are potentially indicated</b> |                                          |                                                                                                                                                                                                                                                                                                     |
| 1                                                                           | Gastrointestinal infections              | Intestinal infectious diseases (A00–A07, A09); Diverticulitis of intestine (K57)                                                                                                                                                                                                                    |
| 2                                                                           | Skin, cutaneous and mucosal infections   | Infections of other skin and subcutaneous tissue including cellulitis, cutaneous abscess, furuncle, carbuncle, impetigo, acute lymphadenitis, folliculitis, mastitis (H050, J340, L00–L08, N61, T814); Infections of the eye and adnexa (H00, H440); Infective otitis externa (H600–H603)           |
| 3                                                                           | Suppurative otitis media                 | Suppurative and unspecified otitis media (H66)                                                                                                                                                                                                                                                      |
| 4                                                                           | Pharyngitis                              | Streptococcal pharyngitis/tonsillitis (J020, J030); Acute pharyngitis/tonsillitis, unspecified (J029, J039); Scarlet fever (A38)                                                                                                                                                                    |
| 5                                                                           | Sinusitis                                | Acute sinusitis (J01); Chronic sinusitis (J32)                                                                                                                                                                                                                                                      |
| 6                                                                           | Bronchitis and bronchiolitis with COPD   | Acute bronchitis (J20) *; Acute bronchiolitis (J21) *; Unspecified acute lower respiratory infection (J22) *                                                                                                                                                                                        |
| 7                                                                           | Acne                                     | Acne (L70)                                                                                                                                                                                                                                                                                          |
| <b>Group 3: Infections for which antibiotics are rarely indicated</b>       |                                          |                                                                                                                                                                                                                                                                                                     |
| 1                                                                           | Nonbacterial gastrointestinal infections | Viral and other specified intestinal infections (A08)                                                                                                                                                                                                                                               |
| 2                                                                           | Nonsuppurative otitis media              | Nonsuppurative otitis media (H65)                                                                                                                                                                                                                                                                   |
| 3                                                                           | Viral upper respiratory infection        | Acute nasopharyngitis [common cold] (J00); Acute pharyngitis/tonsillitis due to other specified organisms (J028, J038); Acute laryngitis and tracheitis (J04); Acute obstructive laryngitis [croup] (J050); Acute upper respiratory infections of multiple and unspecified sites (J06); Cough (R05) |
| 4                                                                           | Influenza                                | Influenza (J10, J11)                                                                                                                                                                                                                                                                                |
| 5                                                                           | Viral pneumonia                          | Viral pneumonia (J12)                                                                                                                                                                                                                                                                               |
| 6                                                                           | Bronchitis and bronchiolitis without     | Acute bronchitis (J20) **; Acute bronchiolitis (J21) **; Unspecified acute lower respiratory infection (J22) **                                                                                                                                                                                     |

1  
2  
3  
4  
5  
6  
7  
8  
9  
10  
11  
12  
13  
14  
15  
16  
17  
18  
19  
20  
21  
22  
23  
24  
25  
26  
27  
28  
29  
30  
31  
32  
33  
34  
35  
36  
37  
38  
39  
40  
41  
42  
43  
44  
45  
46  
47  
48  
49  
50  
51  
52  
53  
54  
55  
56  
57  
58  
59  
60

| COPD |                        |                                                              |
|------|------------------------|--------------------------------------------------------------|
| 7    | Noninfectious diarrhea | Noninfective gastroenteritis and colitis, unspecified (K529) |
| 8    | Fever                  | Fever of unknown origin (R50)                                |

- 3 \*includes visits in which ICD-10 code for COPD (J41–J44) are present
- 4 \*\*includes visits in which ICD-10 code for COPD (J41–J44) are not present

For peer review only

## STROBE Statement—checklist of items that should be included in reports of observational studies

|                              | Item No | Recommendation                                                                                                                                                                                                                                                                                                                                                                                                                                                         | Page No |
|------------------------------|---------|------------------------------------------------------------------------------------------------------------------------------------------------------------------------------------------------------------------------------------------------------------------------------------------------------------------------------------------------------------------------------------------------------------------------------------------------------------------------|---------|
| <b>Title and abstract</b>    | 1       | (a) Indicate the study's design with a commonly used term in the title or the abstract                                                                                                                                                                                                                                                                                                                                                                                 | 1       |
|                              |         | (b) Provide in the abstract an informative and balanced summary of what was done and what was found                                                                                                                                                                                                                                                                                                                                                                    | 3       |
| <b>Introduction</b>          |         |                                                                                                                                                                                                                                                                                                                                                                                                                                                                        |         |
| Background/rationale         | 2       | Explain the scientific background and rationale for the investigation being reported                                                                                                                                                                                                                                                                                                                                                                                   | 5       |
| Objectives                   | 3       | State specific objectives, including any prespecified hypotheses                                                                                                                                                                                                                                                                                                                                                                                                       | 6       |
| <b>Methods</b>               |         |                                                                                                                                                                                                                                                                                                                                                                                                                                                                        |         |
| Study design                 | 4       | Present key elements of study design early in the paper                                                                                                                                                                                                                                                                                                                                                                                                                | 7       |
| Setting                      | 5       | Describe the setting, locations, and relevant dates, including periods of recruitment, exposure, follow-up, and data collection                                                                                                                                                                                                                                                                                                                                        | 7–8     |
| Participants                 | 6       | (a) <i>Cohort study</i> —Give the eligibility criteria, and the sources and methods of selection of participants. Describe methods of follow-up<br><i>Case-control study</i> —Give the eligibility criteria, and the sources and methods of case ascertainment and control selection. Give the rationale for the choice of cases and controls<br><i>Cross-sectional study</i> —Give the eligibility criteria, and the sources and methods of selection of participants | 9       |
|                              |         | (b) <i>Cohort study</i> —For matched studies, give matching criteria and number of exposed and unexposed<br><i>Case-control study</i> —For matched studies, give matching criteria and the number of controls per case                                                                                                                                                                                                                                                 |         |
| Variables                    | 7       | Clearly define all outcomes, exposures, predictors, potential confounders, and effect modifiers. Give diagnostic criteria, if applicable                                                                                                                                                                                                                                                                                                                               | 9       |
| Data sources/<br>measurement | 8*      | For each variable of interest, give sources of data and details of methods of assessment (measurement). Describe comparability of assessment methods if there is more than one group                                                                                                                                                                                                                                                                                   | 8–9     |
| Bias                         | 9       | Describe any efforts to address potential sources of bias                                                                                                                                                                                                                                                                                                                                                                                                              |         |
| Study size                   | 10      | Explain how the study size was arrived at                                                                                                                                                                                                                                                                                                                                                                                                                              |         |
| Quantitative variables       | 11      | Explain how quantitative variables were handled in the analyses. If applicable, describe which groupings were chosen and why                                                                                                                                                                                                                                                                                                                                           |         |
| Statistical methods          | 12      | (a) Describe all statistical methods, including those used to control for confounding                                                                                                                                                                                                                                                                                                                                                                                  | 9–10    |
|                              |         | (b) Describe any methods used to examine subgroups and interactions                                                                                                                                                                                                                                                                                                                                                                                                    | 9–10    |
|                              |         | (c) Explain how missing data were addressed                                                                                                                                                                                                                                                                                                                                                                                                                            |         |
|                              |         | (d) <i>Cohort study</i> —If applicable, explain how loss to follow-up was addressed<br><i>Case-control study</i> —If applicable, explain how matching of cases and controls was addressed<br><i>Cross-sectional study</i> —If applicable, describe analytical methods taking account of sampling strategy                                                                                                                                                              |         |
|                              |         | (e) Describe any sensitivity analyses                                                                                                                                                                                                                                                                                                                                                                                                                                  |         |

Continued on next page

1  
2  
3  
4  
5  
6  
7  
8  
9  
10  
11  
12  
13  
14  
15  
16  
17  
18  
19  
20  
21  
22  
23  
24  
25  
26  
27  
28  
29  
30  
31  
32  
33  
34  
35  
36  
37  
38  
39  
40  
41  
42  
43  
44  
45  
46  
47  
48  
49  
50  
51  
52  
53  
54  
55  
56  
57  
58  
59  
60

| <b>Results</b>           |     |                                                                                                                                                                                                              |           |
|--------------------------|-----|--------------------------------------------------------------------------------------------------------------------------------------------------------------------------------------------------------------|-----------|
| Participants             | 13* | (a) Report numbers of individuals at each stage of study—eg numbers potentially eligible, examined for eligibility, confirmed eligible, included in the study, completing follow-up, and analysed            | 11        |
|                          |     | (b) Give reasons for non-participation at each stage                                                                                                                                                         |           |
|                          |     | (c) Consider use of a flow diagram                                                                                                                                                                           |           |
| Descriptive data         | 14* | (a) Give characteristics of study participants (eg demographic, clinical, social) and information on exposures and potential confounders                                                                     | 11        |
|                          |     | (b) Indicate number of participants with missing data for each variable of interest                                                                                                                          |           |
|                          |     | (c) <i>Cohort study</i> —Summarise follow-up time (eg, average and total amount)                                                                                                                             |           |
| Outcome data             | 15* | <i>Cohort study</i> —Report numbers of outcome events or summary measures over time                                                                                                                          | 11        |
|                          |     | <i>Case-control study</i> —Report numbers in each exposure category, or summary measures of exposure                                                                                                         |           |
|                          |     | <i>Cross-sectional study</i> —Report numbers of outcome events or summary measures                                                                                                                           |           |
| Main results             | 16  | (a) Give unadjusted estimates and, if applicable, confounder-adjusted estimates and their precision (eg, 95% confidence interval). Make clear which confounders were adjusted for and why they were included | 12–<br>13 |
|                          |     | (b) Report category boundaries when continuous variables were categorized                                                                                                                                    |           |
|                          |     | (c) If relevant, consider translating estimates of relative risk into absolute risk for a meaningful time period                                                                                             |           |
| Other analyses           | 17  | Report other analyses done—eg analyses of subgroups and interactions, and sensitivity analyses                                                                                                               |           |
| <b>Discussion</b>        |     |                                                                                                                                                                                                              |           |
| Key results              | 18  | Summarise key results with reference to study objectives                                                                                                                                                     | 14–<br>18 |
| Limitations              | 19  | Discuss limitations of the study, taking into account sources of potential bias or imprecision. Discuss both direction and magnitude of any potential bias                                                   | 18–<br>19 |
| Interpretation           | 20  | Give a cautious overall interpretation of results considering objectives, limitations, multiplicity of analyses, results from similar studies, and other relevant evidence                                   | 19–<br>20 |
| Generalisability         | 21  | Discuss the generalisability (external validity) of the study results                                                                                                                                        | 18        |
| <b>Other information</b> |     |                                                                                                                                                                                                              |           |
| Funding                  | 22  | Give the source of funding and the role of the funders for the present study and, if applicable, for the original study on which the present article is based                                                | 21        |

\*Give information separately for cases and controls in case-control studies and, if applicable, for exposed and unexposed groups in cohort and cross-sectional studies.

**Note:** An Explanation and Elaboration article discusses each checklist item and gives methodological background and published examples of transparent reporting. The STROBE checklist is best used in conjunction with this article (freely available on the Web sites of PLoS Medicine at <http://www.plosmedicine.org/>, Annals of Internal Medicine at <http://www.annals.org/>, and Epidemiology at <http://www.epidem.com/>). Information on the STROBE Initiative is available at [www.strobe-statement.org](http://www.strobe-statement.org).
