# Supplementary material for: Antibiotic prescription among outpatients in a prefecture of Japan, 2012–2013: a retrospective claims database study
Source: PubMed Central journal article supplement — BMJ Open. 2019 Apr 3;9(4):e026251. doi: 10.1136/bmjopen-2018-026251 (PMC6500307; doi:10.1136/bmjopen-2018-026251), 2019-04-03
Supplement: bmjopen-2018-026251supp001.pdf [file bmjopen-2018-026251supp001.pdf]

1 **Table S1.** Classification of infections by groups with corresponding ICD-10 codes

2

| Diagnosis                                                              |                                    |  | ICD-10 codes                                                                                                                                                                                                                                                                                                                                                                                                                                                                                                                                                                                                                                                            |
|------------------------------------------------------------------------|------------------------------------|--|-------------------------------------------------------------------------------------------------------------------------------------------------------------------------------------------------------------------------------------------------------------------------------------------------------------------------------------------------------------------------------------------------------------------------------------------------------------------------------------------------------------------------------------------------------------------------------------------------------------------------------------------------------------------------|
| <b>Group 1: Infections for which antibiotics are usually indicated</b> |                                    |  |                                                                                                                                                                                                                                                                                                                                                                                                                                                                                                                                                                                                                                                                         |
| 1                                                                      | Miscellaneous bacterial infections |  | Tuberculosis (A15–A19); Certain zoonotic bacterial diseases (A20–A28); Other bacterial diseases including listeriosis, diphtheria, bartonellosis, erysipelas, and rickettsioses (A30–A37, A39–A49, A75–A79); Bacterial meningitis, encephalitis, and intracranial abscess (G00, G042, G049, G06); Mastoiditis (H70); Infective endocarditis (I33, T826); Acute epiglottitis (J051); Deep neck space infections (J36, J390, J391); Abscess of lung and mediastinum; Pyothorax (J85, J86); Infections of the jaws and mouth (K102, K122); Infections due to cardiac and vascular devices (T827); Infection due to internal prosthetic devices, implants and grafts (T857) |
| 2                                                                      | Sexually transmitted infections    |  | Infections with a predominantly sexual mode of transmission (A50–A64); Other spirochetal diseases (A65–A69); Other diseases caused by chlamydia (A70–A74)                                                                                                                                                                                                                                                                                                                                                                                                                                                                                                               |
| 3                                                                      | Pneumonia                          |  | Bacterial pneumonia (J13–J18)                                                                                                                                                                                                                                                                                                                                                                                                                                                                                                                                                                                                                                           |
| 4                                                                      | Abdominal infections               |  | Acute appendicitis (K35); Abscess of anal and rectal regions, intestine, and liver (K61, K630, K750); Peritonitis (K65); Cholecystitis and cholangitis (K800, K801, K803, K804, K810, K819, K830)                                                                                                                                                                                                                                                                                                                                                                                                                                                                       |
| 5                                                                      | Orthopedic infections              |  | Pyogenic arthritis and prosthetic joint infection (M00, T845); necrotizing fasciitis (M726); Infective myositis, synovitis and bursitis (M600, M650–M651, M710–M711); Osteomyelitis (M462–M465, M86)                                                                                                                                                                                                                                                                                                                                                                                                                                                                    |
| 6                                                                      | Urinary tract infections           |  | Acute pyelonephritis/pyonephrosis ((N10, N12, N136); Renal abscess (N151); Kidney infection, unspecified (N159); Acute cystitis (N300); Cystitis, unspecified (N308, N309); Urethritis and urethral abscess (N34); Urinary tract infections, unspecified (N390); Prostatitis and abscess of prostate (N41); Orchitis and epididymitis (N45); Catheter                                                                                                                                                                                                                                                                                                                   |

|                                                                             |                                          |                                                                                                                                                                                                                                                                                                     |
|-----------------------------------------------------------------------------|------------------------------------------|-----------------------------------------------------------------------------------------------------------------------------------------------------------------------------------------------------------------------------------------------------------------------------------------------------|
|                                                                             |                                          | associated urinary tract infections (T835)                                                                                                                                                                                                                                                          |
| 7                                                                           | Pelvic inflammatory diseases             | Pelvic inflammatory diseases (N70–N73, N751, N760–N764); Infections of genitourinary tract in pregnancy (O23)                                                                                                                                                                                       |
| <b>Group 2 : Infections for which antibiotics are potentially indicated</b> |                                          |                                                                                                                                                                                                                                                                                                     |
| 1                                                                           | Gastrointestinal infections              | Intestinal infectious diseases (A00–A07, A09); Diverticulitis of intestine (K57)                                                                                                                                                                                                                    |
| 2                                                                           | Skin, cutaneous and mucosal infections   | Infections of other skin and subcutaneous tissue including cellulitis, cutaneous abscess, furuncle, carbuncle, impetigo, acute lymphadenitis, folliculitis, mastitis (H050, J340, L00–L08, N61, T814); Infections of the eye and adnexa (H00, H440); Infective otitis externa (H600–H603)           |
| 3                                                                           | Suppurative otitis media                 | Suppurative and unspecified otitis media (H66)                                                                                                                                                                                                                                                      |
| 4                                                                           | Pharyngitis                              | Streptococcal pharyngitis/tonsillitis (J020, J030); Acute pharyngitis/tonsillitis, unspecified (J029, J039); Scarlet fever (A38)                                                                                                                                                                    |
| 5                                                                           | Sinusitis                                | Acute sinusitis (J01); Chronic sinusitis (J32)                                                                                                                                                                                                                                                      |
| 6                                                                           | Bronchitis and bronchiolitis with COPD   | Acute bronchitis (J20) *; Acute bronchiolitis (J21) *; Unspecified acute lower respiratory infection (J22) *                                                                                                                                                                                        |
| 7                                                                           | Acne                                     | Acne (L70)                                                                                                                                                                                                                                                                                          |
| <b>Group 3: Infections for which antibiotics are rarely indicated</b>       |                                          |                                                                                                                                                                                                                                                                                                     |
| 1                                                                           | Nonbacterial gastrointestinal infections | Viral and other specified intestinal infections (A08)                                                                                                                                                                                                                                               |
| 2                                                                           | Nonsuppurative otitis media              | Nonsuppurative otitis media (H65)                                                                                                                                                                                                                                                                   |
| 3                                                                           | Viral upper respiratory infection        | Acute nasopharyngitis [common cold] (J00); Acute pharyngitis/tonsillitis due to other specified organisms (J028, J038); Acute laryngitis and tracheitis (J04); Acute obstructive laryngitis [croup] (J050); Acute upper respiratory infections of multiple and unspecified sites (J06); Cough (R05) |
| 4                                                                           | Influenza                                | Influenza (J10, J11)                                                                                                                                                                                                                                                                                |
| 5                                                                           | Viral pneumonia                          | Viral pneumonia (J12)                                                                                                                                                                                                                                                                               |
| 6                                                                           | Bronchitis and bronchiolitis without     | Acute bronchitis (J20) **; Acute bronchiolitis (J21) **; Unspecified acute lower respiratory infection (J22) **                                                                                                                                                                                     |

| COPD |                        |                                                              |
|------|------------------------|--------------------------------------------------------------|
| 7    | Noninfectious diarrhea | Noninfective gastroenteritis and colitis, unspecified (K529) |
| 8    | Fever                  | Fever of unknown origin (R50)                                |

3 \*includes visits in which ICD-10 code for COPD (J41–J44) are present

4 \*\*includes visits in which ICD-10 code for COPD (J41–J44) are not present
